# Supplementary material for: Characterization of Prevalence and Health Consequences of Uniparental Disomy in Four Million Individuals from the General Population
Source: PubMed Central journal article supplement — Am J Hum Genet. 2019 Oct 10;105(5):921–32. doi: 10.1016/j.ajhg.2019.09.016 (PMC6848996; doi:10.1016/j.ajhg.2019.09.016), 2019-10-10

### Putative UPD16

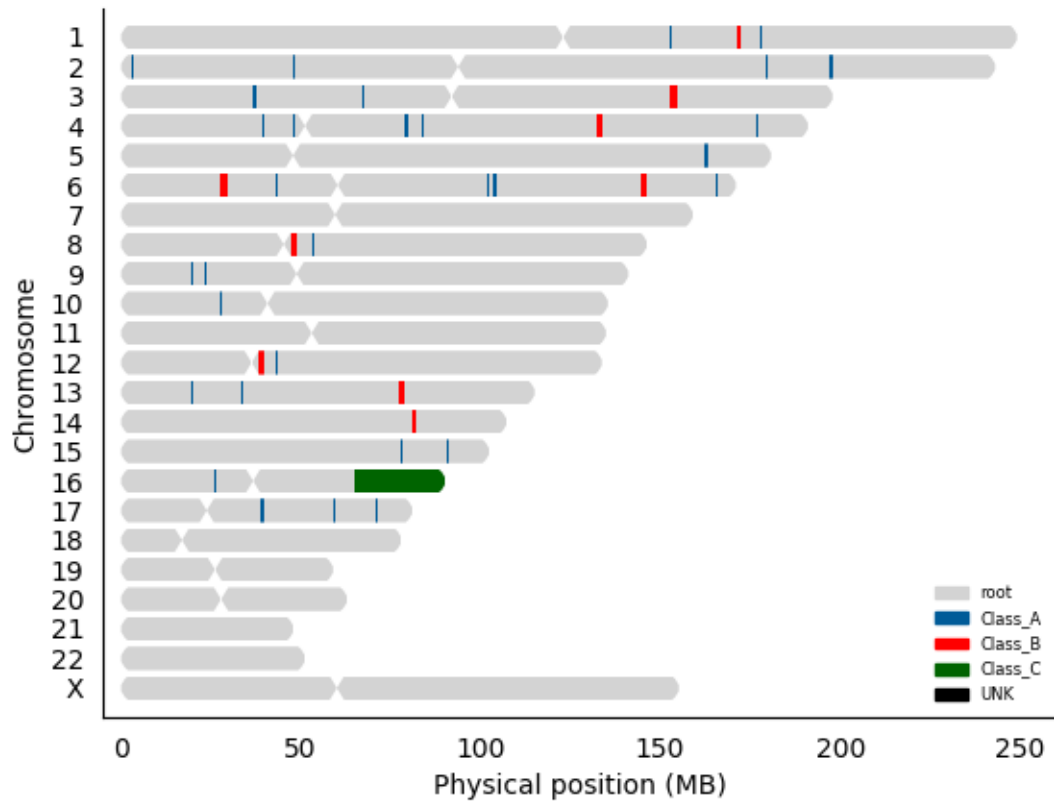

### Putative UPD9

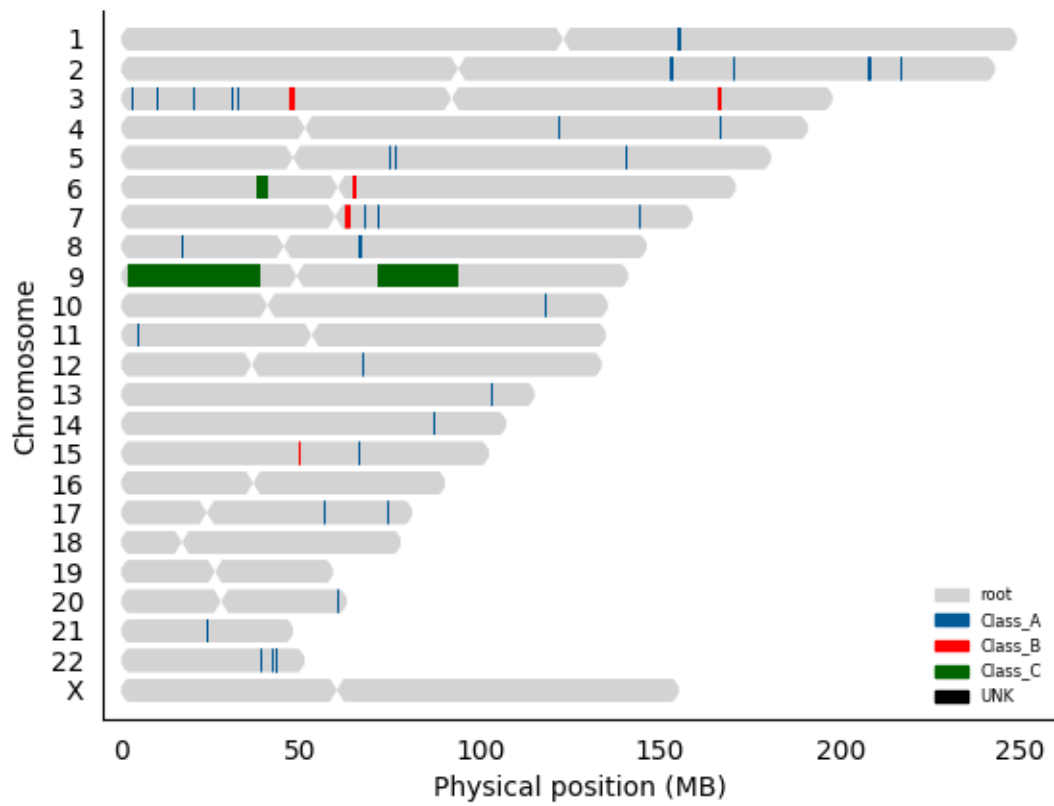

### Putative UPD16

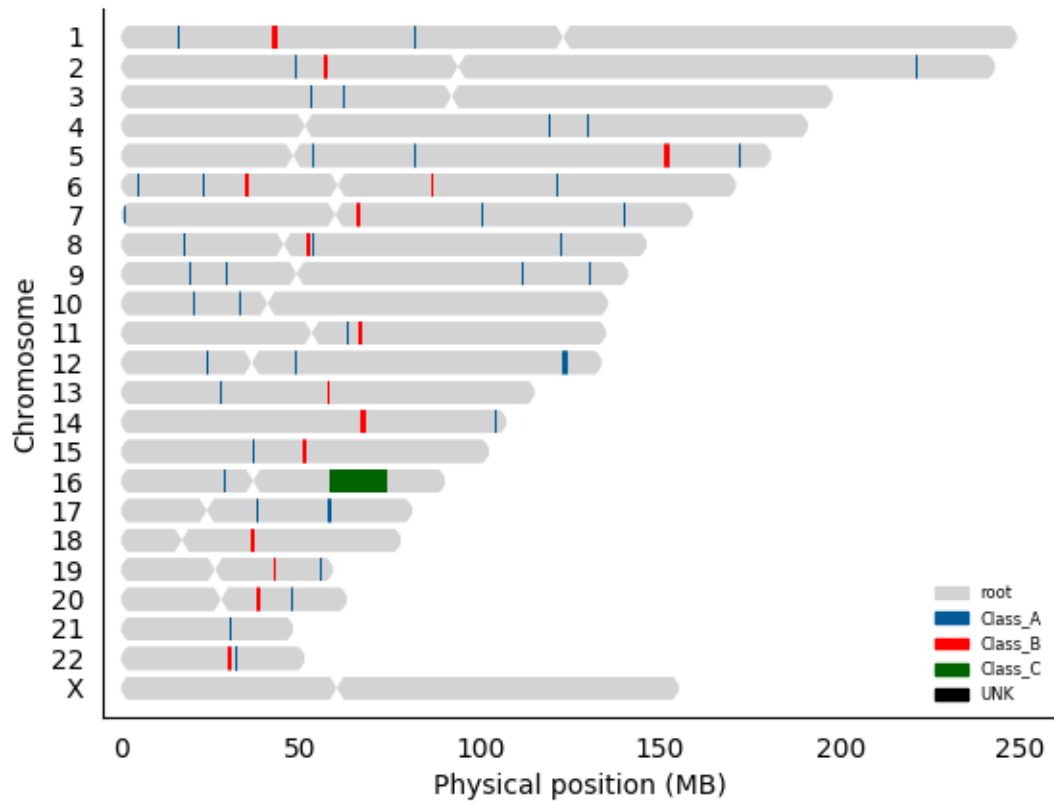

### Putative UPDX

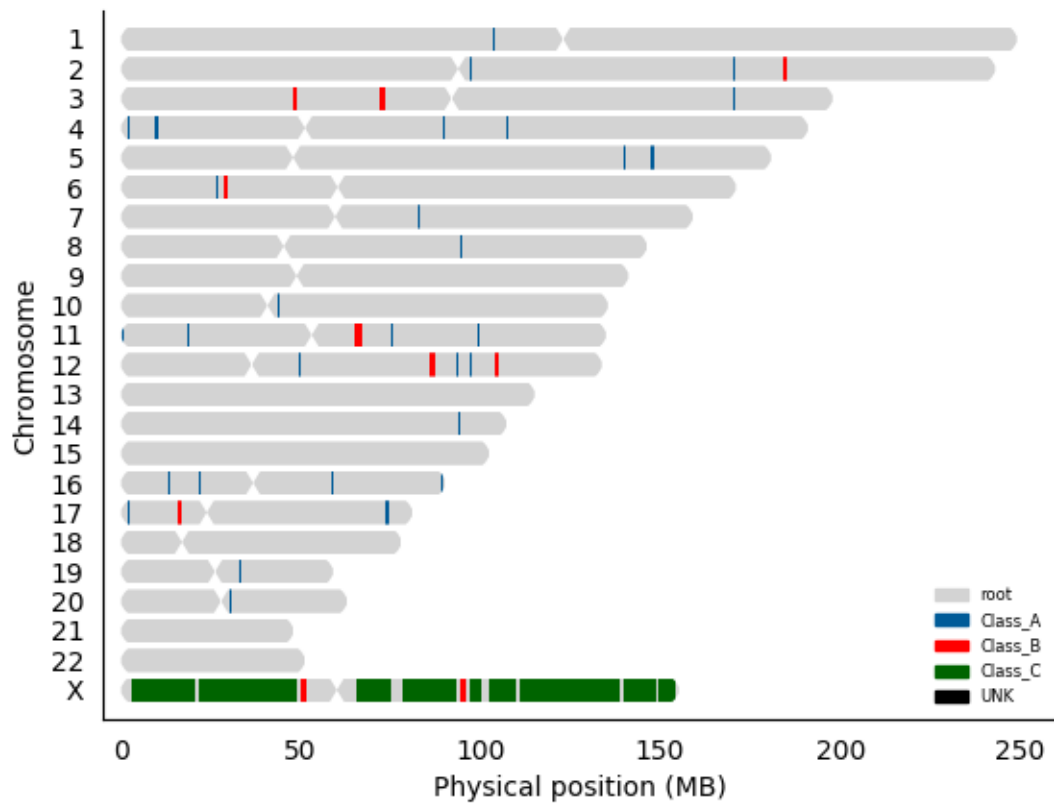

### Putative UPD9

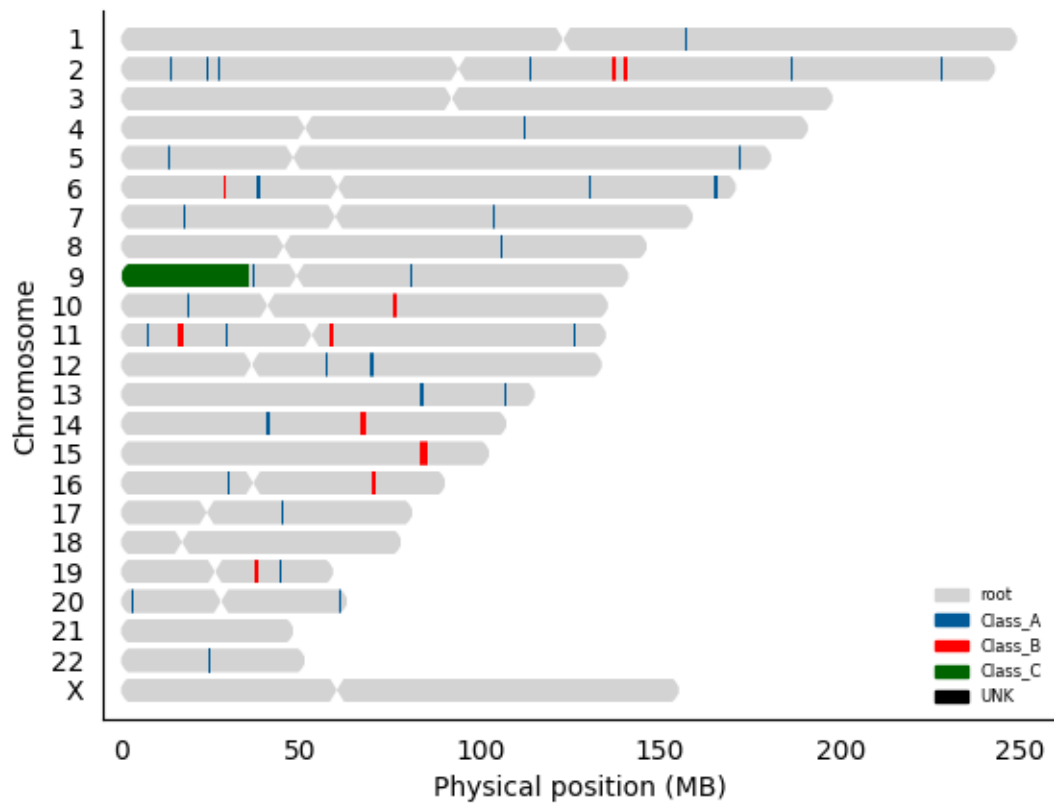

### Putative UPDX

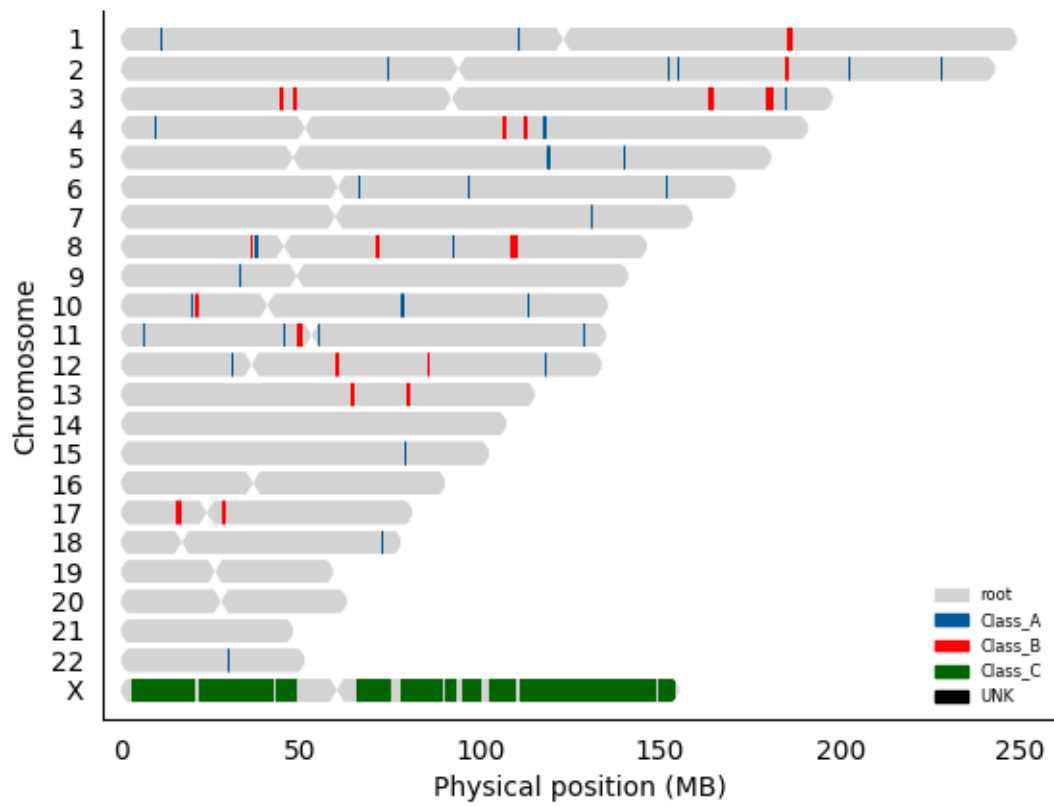

### Putative UPD16

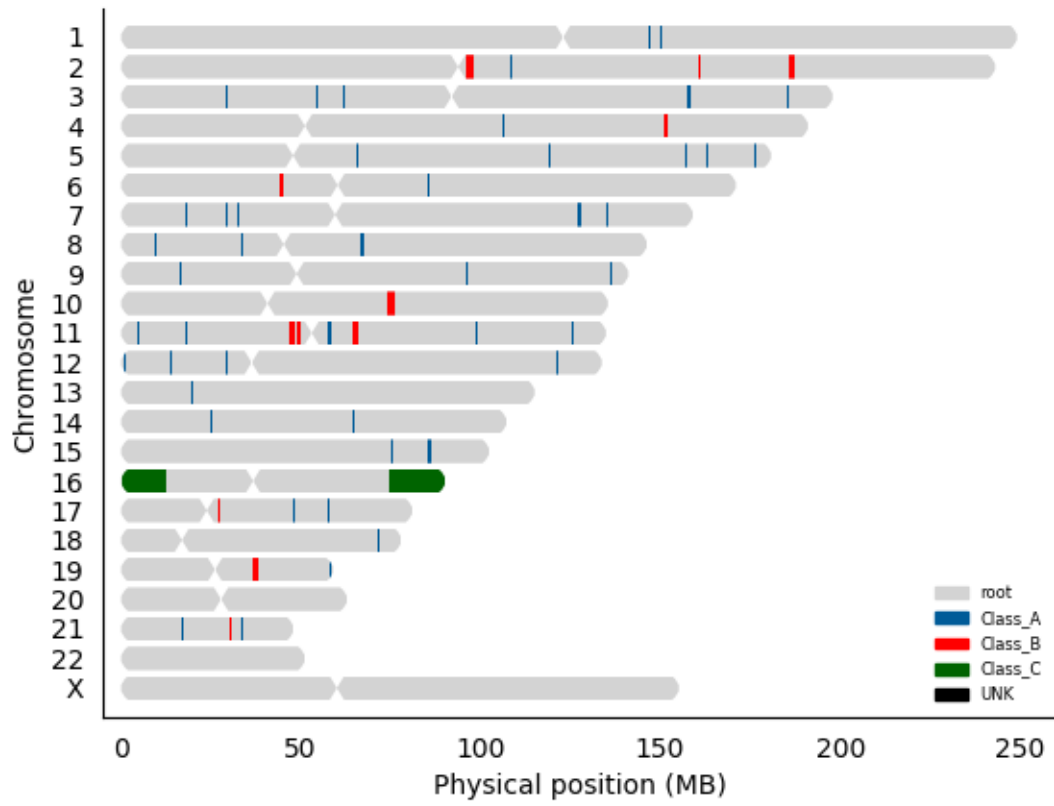

### Putative UPD9

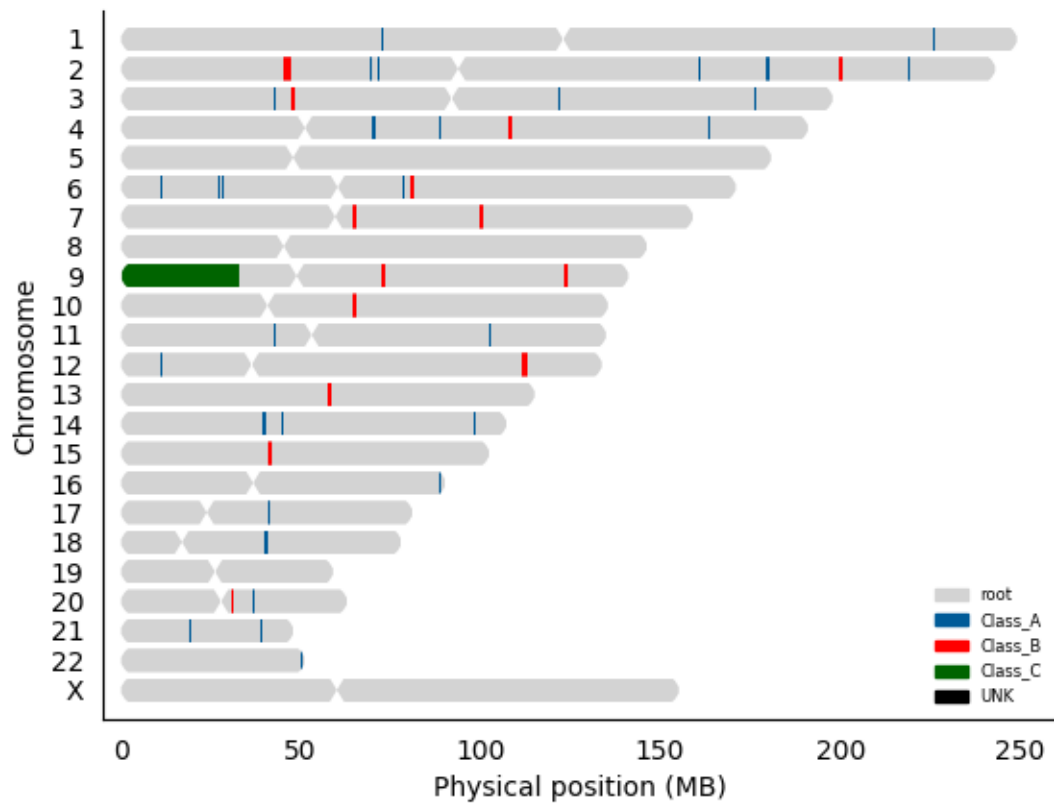



### Putative UPDX

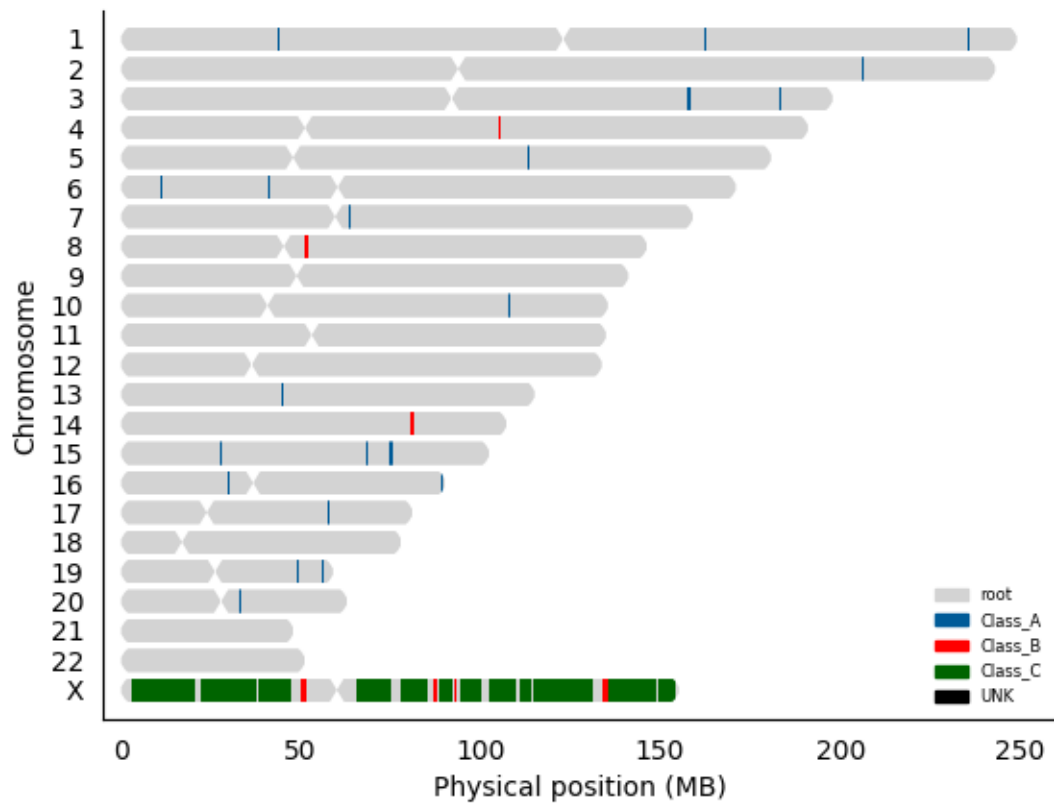

### Putative UPD16

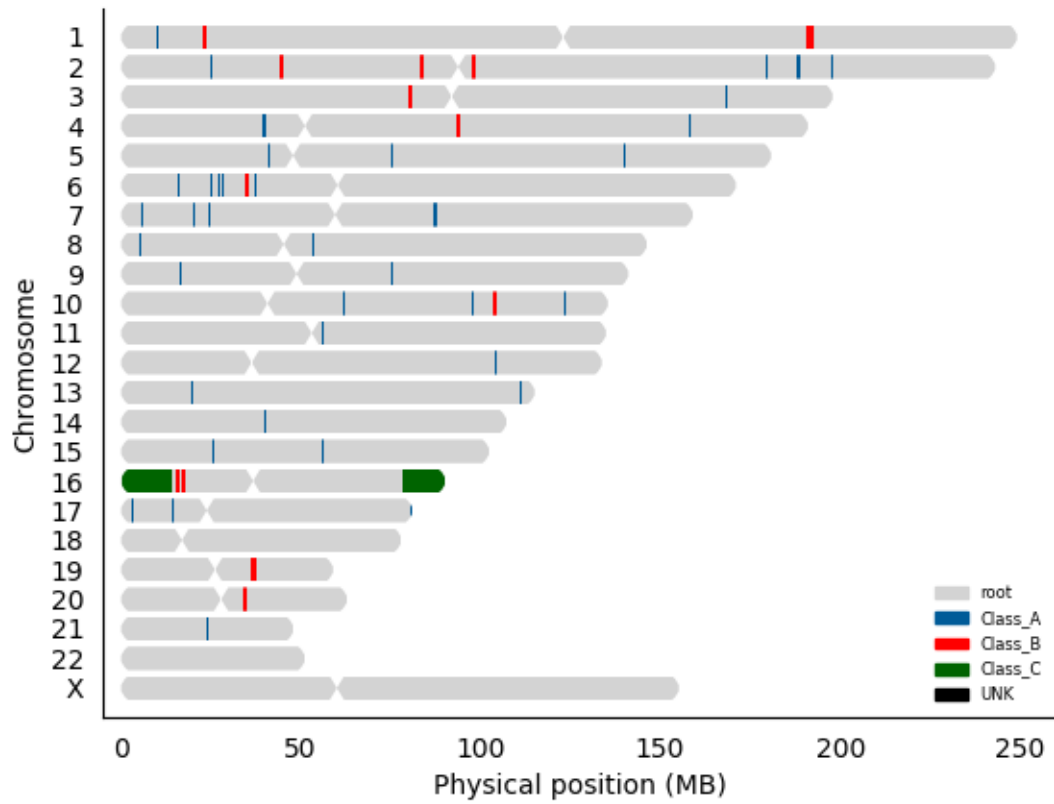

### Putative UPD9

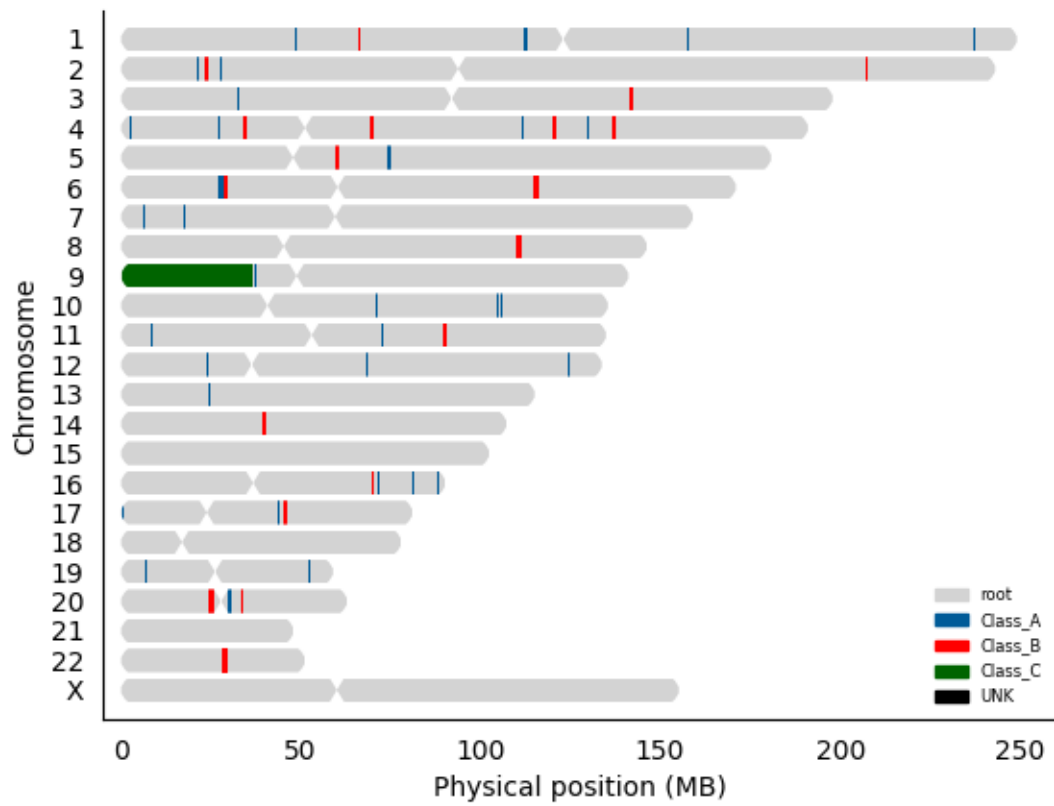

### Putative UPD16

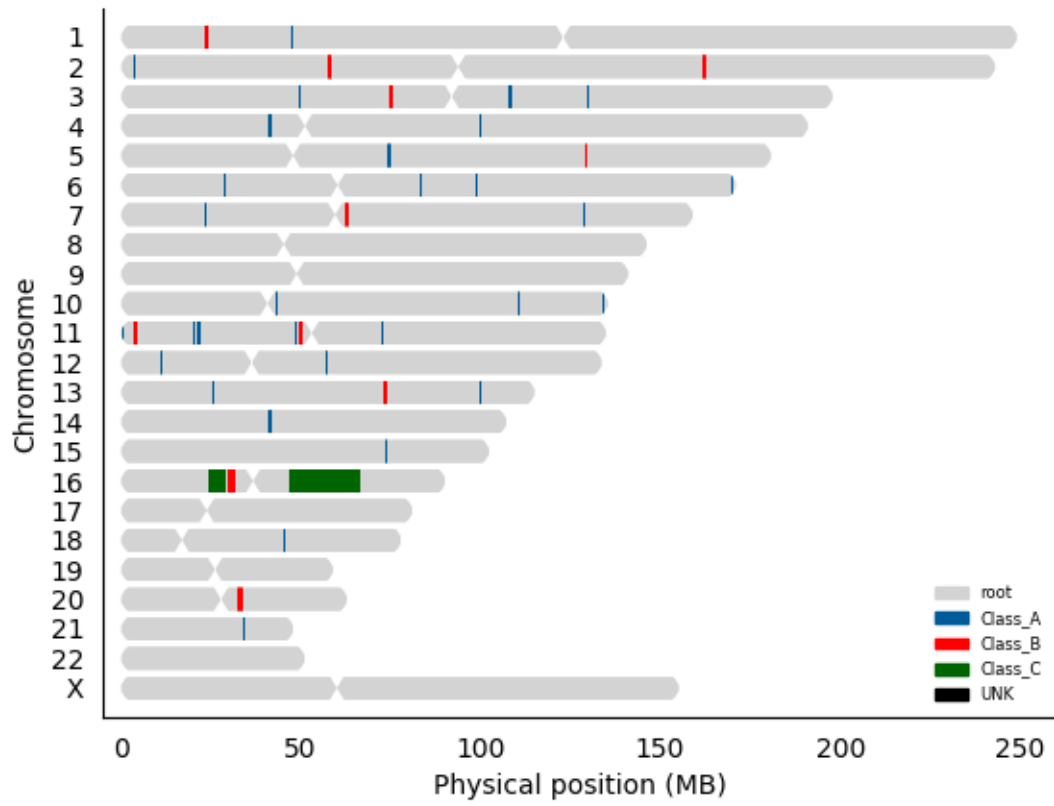

### Putative UPDX

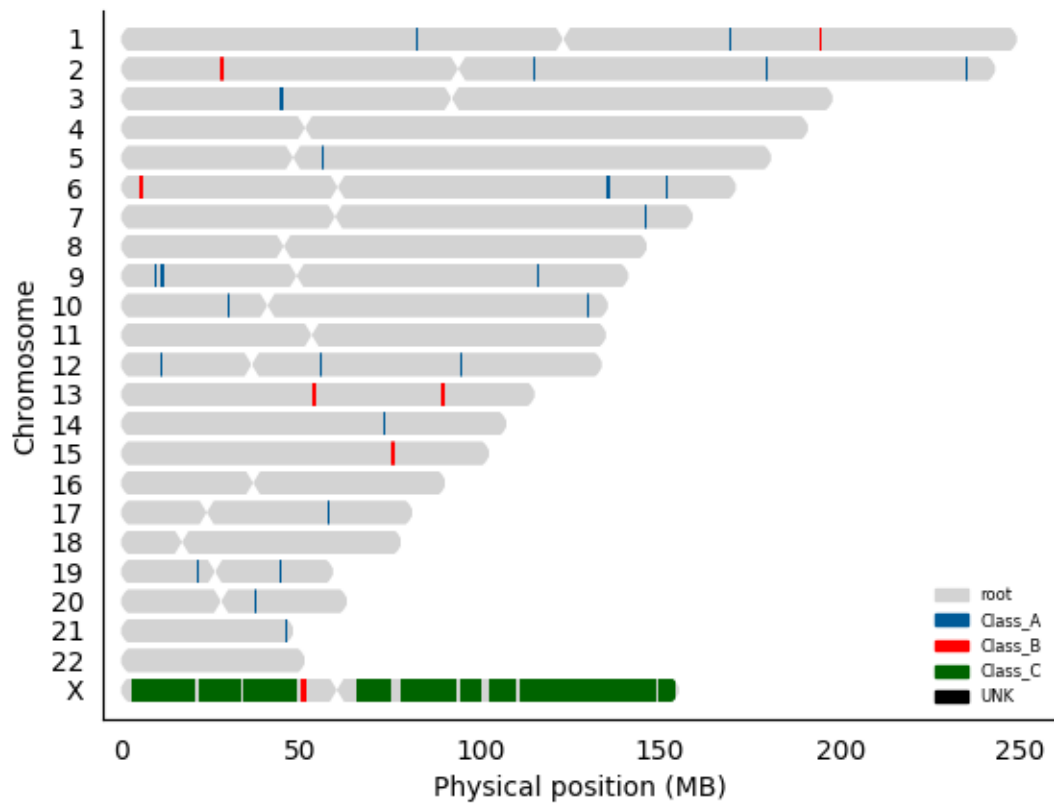

### Putative UPD9

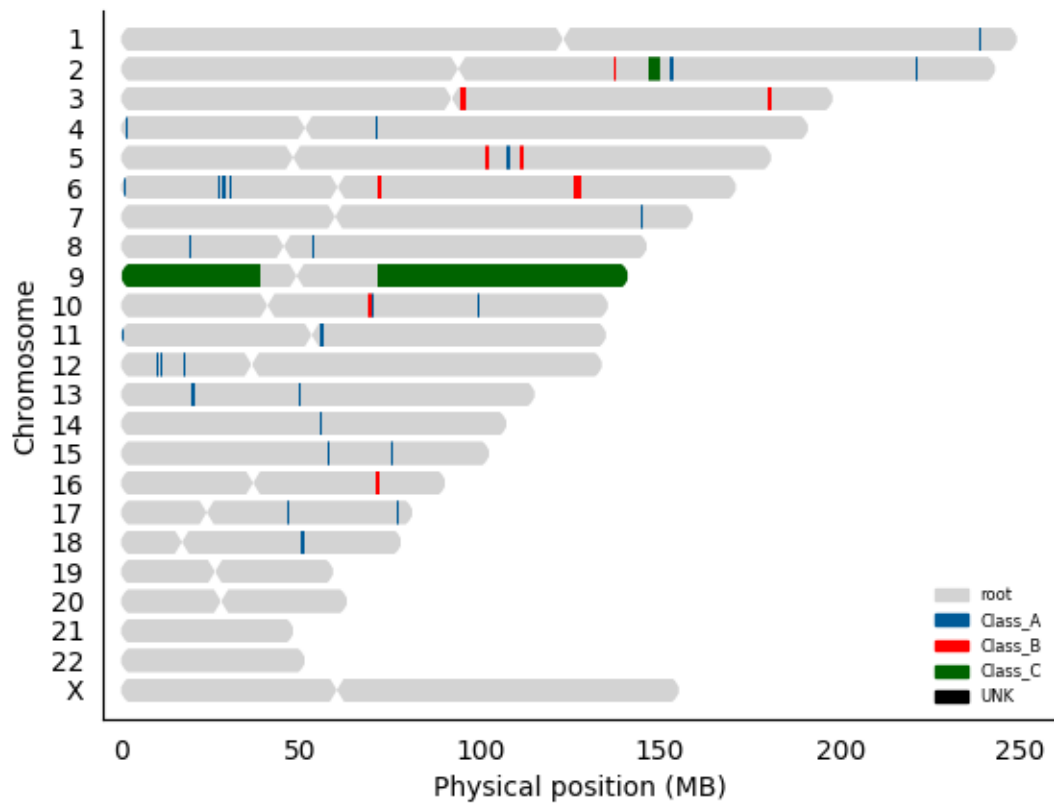

### Putative UPDX

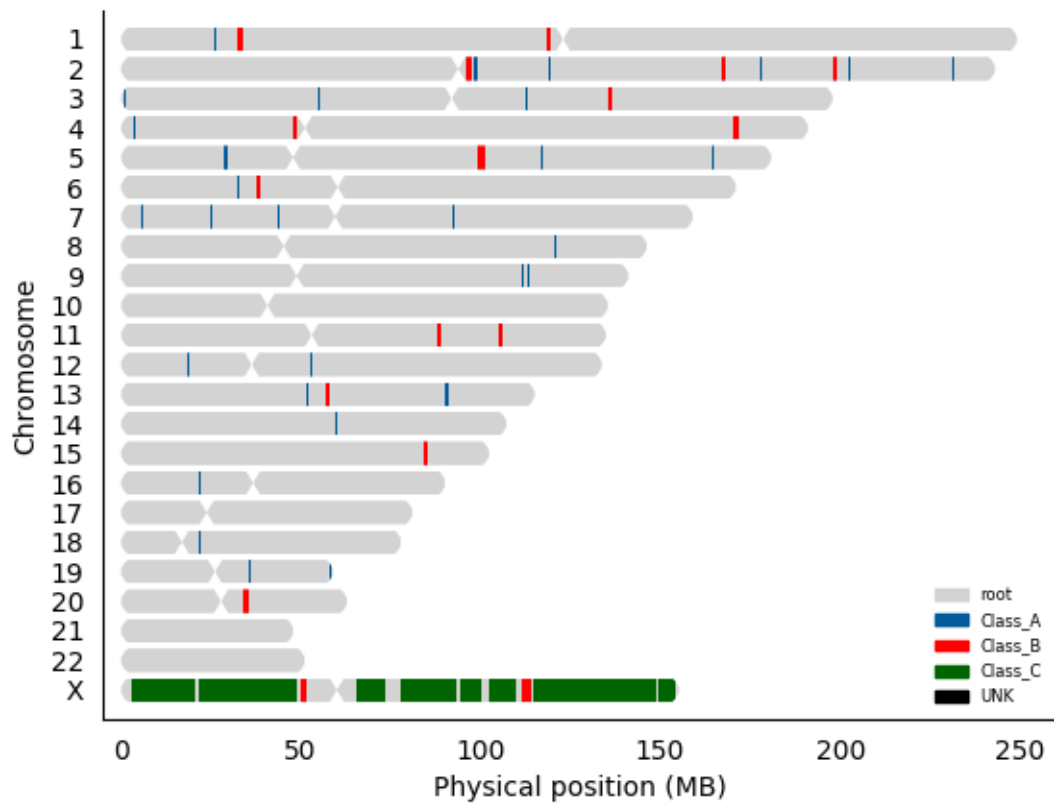

### Putative UPD9

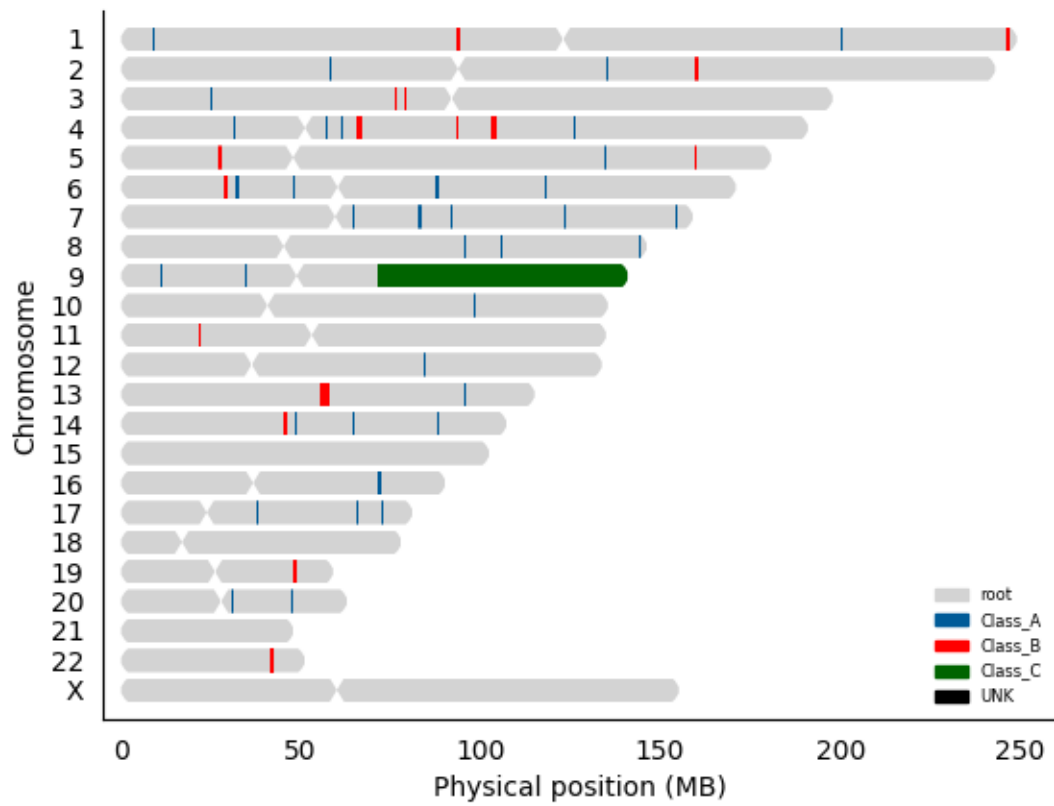



### Putative UPD16

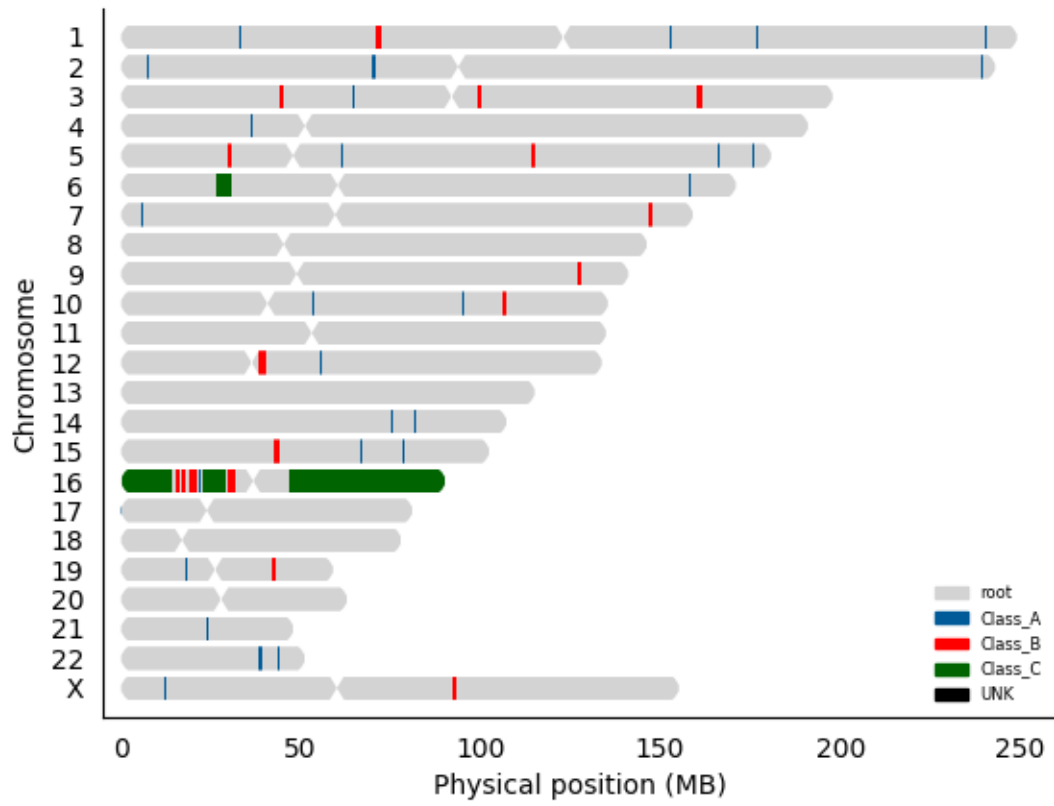

### Putative UPDX

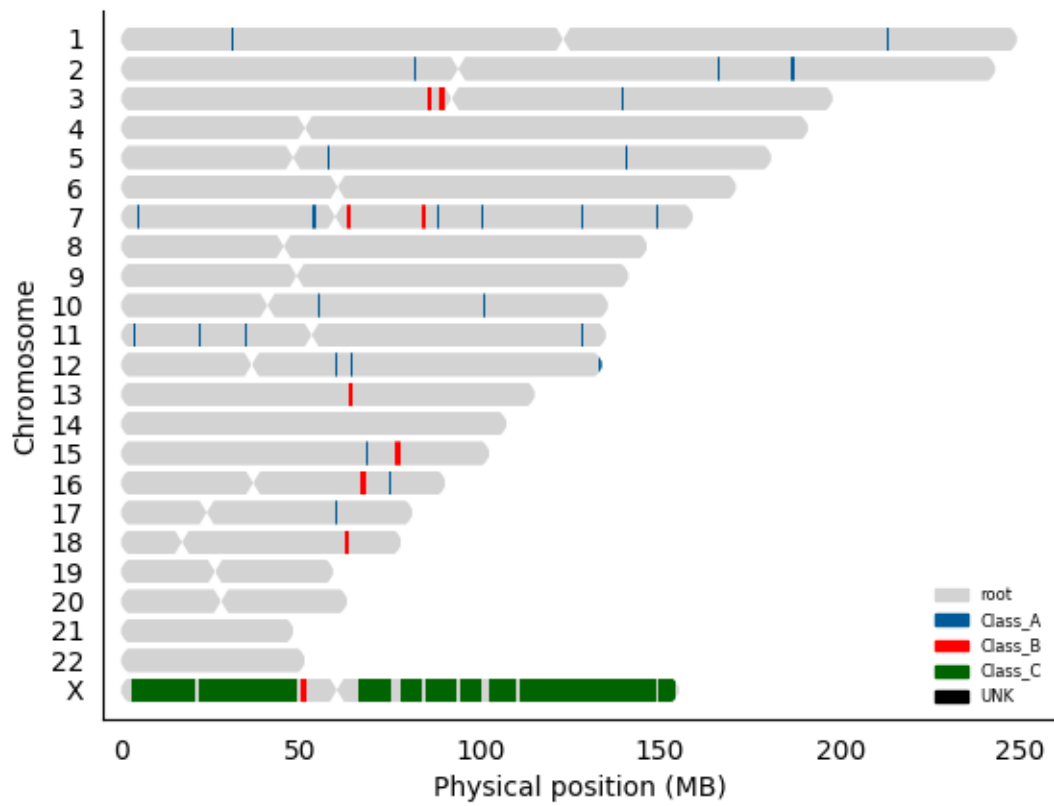

### Putative UPD16

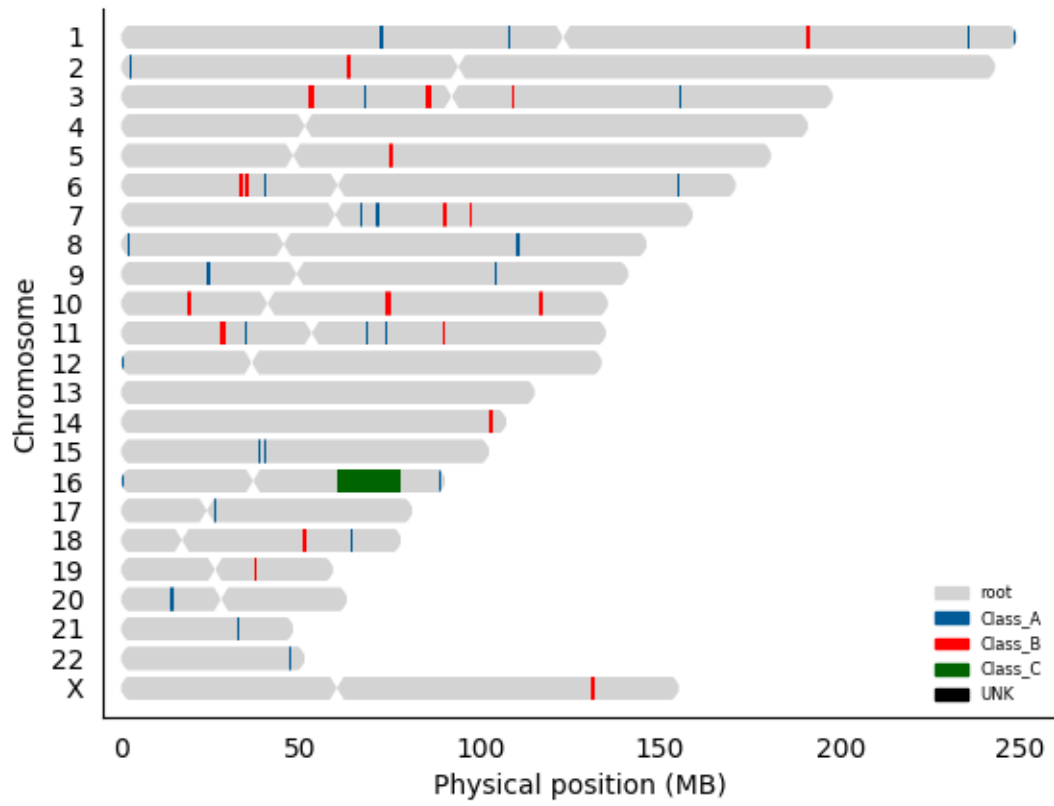

### Putative UPD9

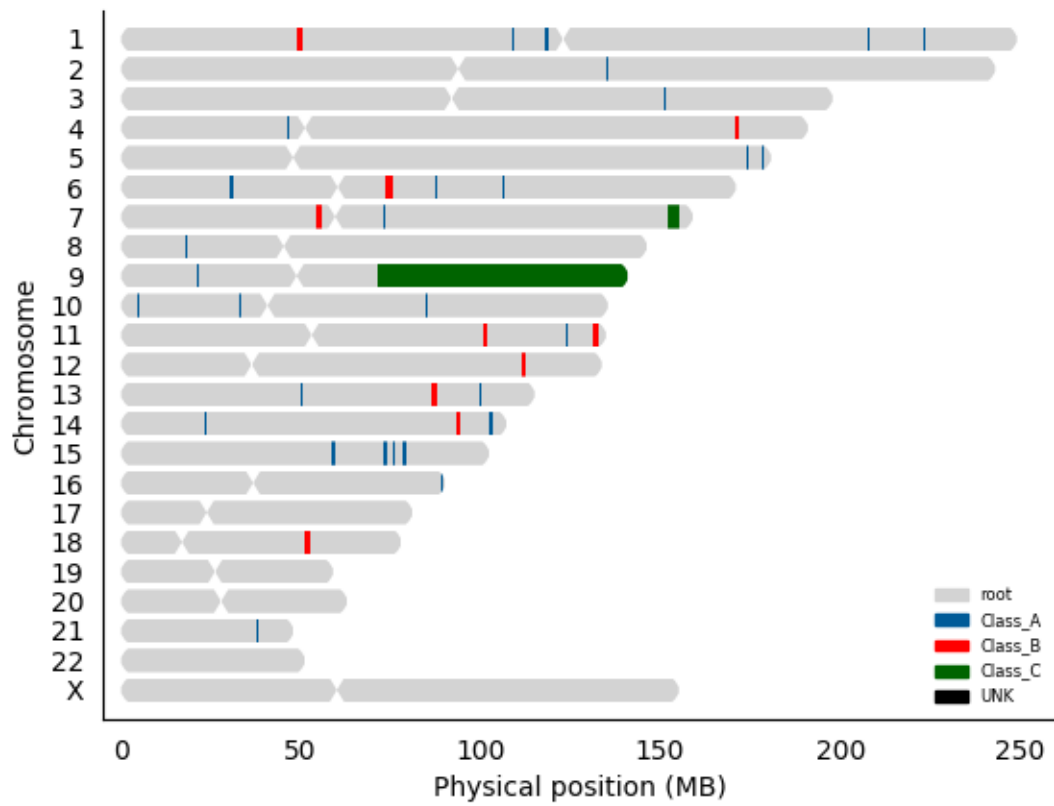

### Putative UPD16

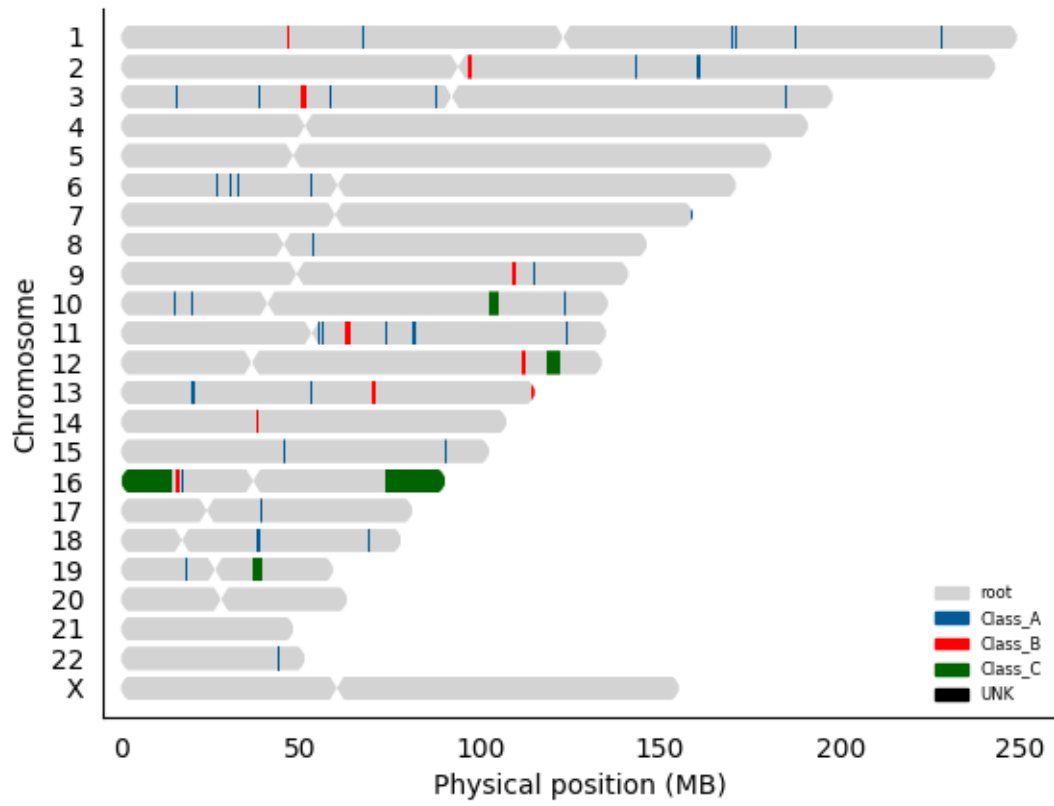

### Putative UPDX

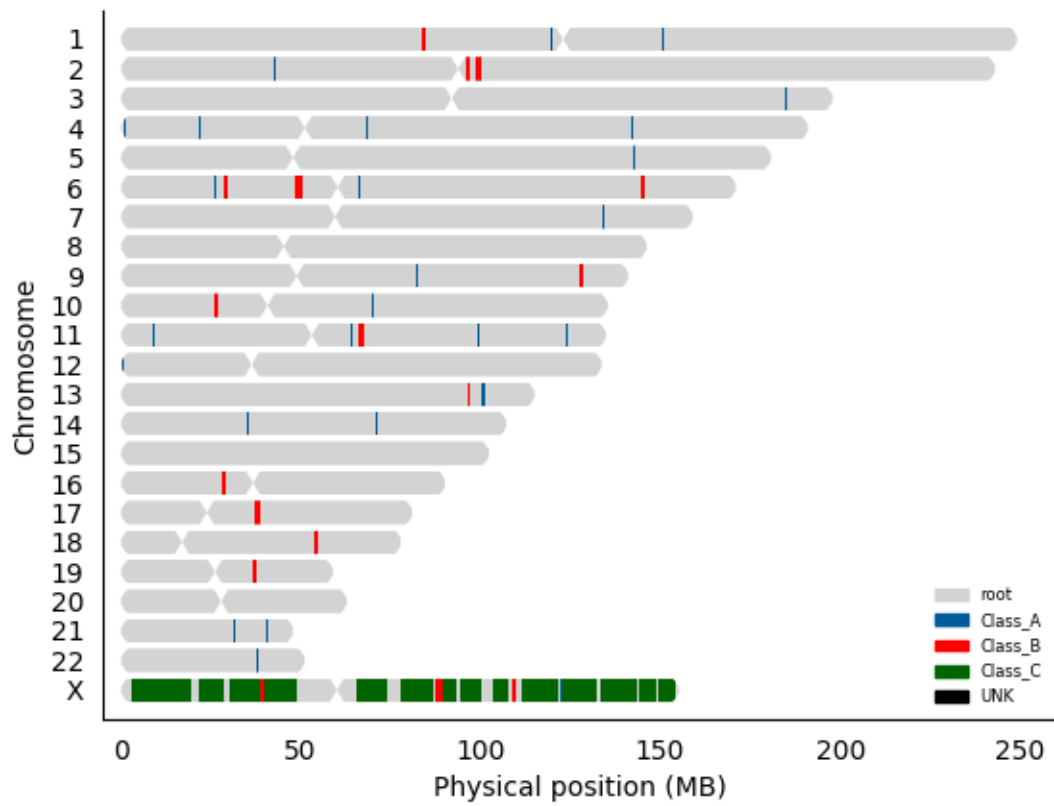

### Putative UPD9

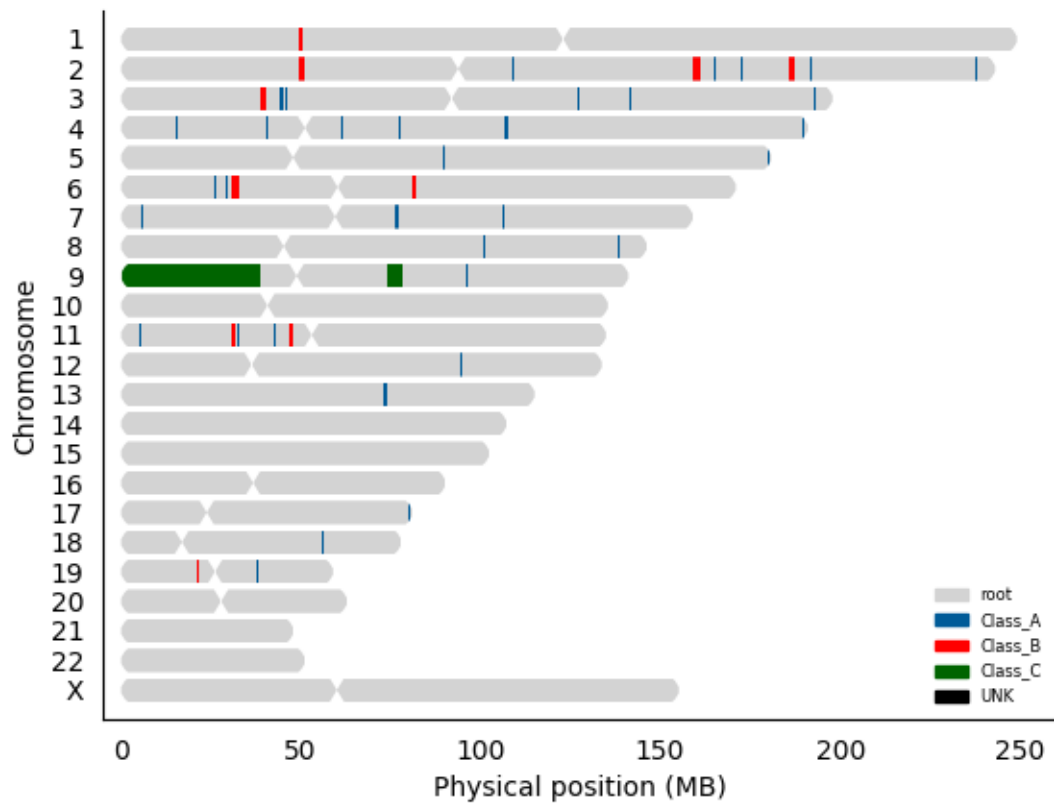

### Putative UPDX

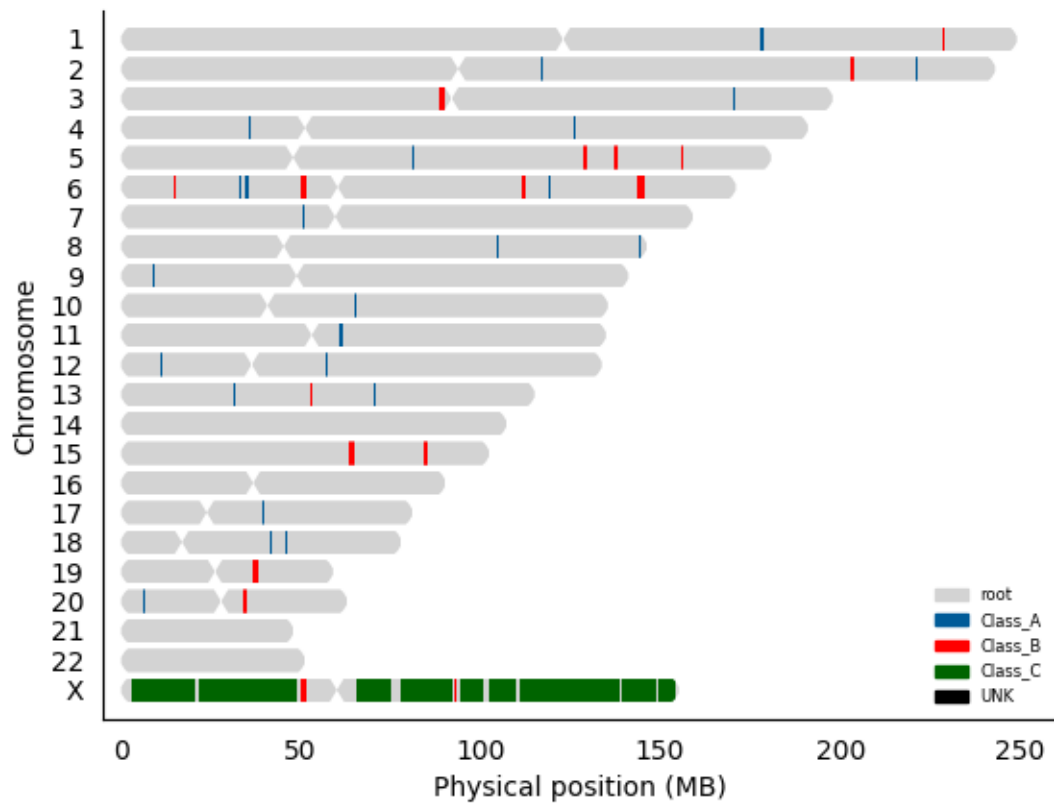



### Putative UPD9

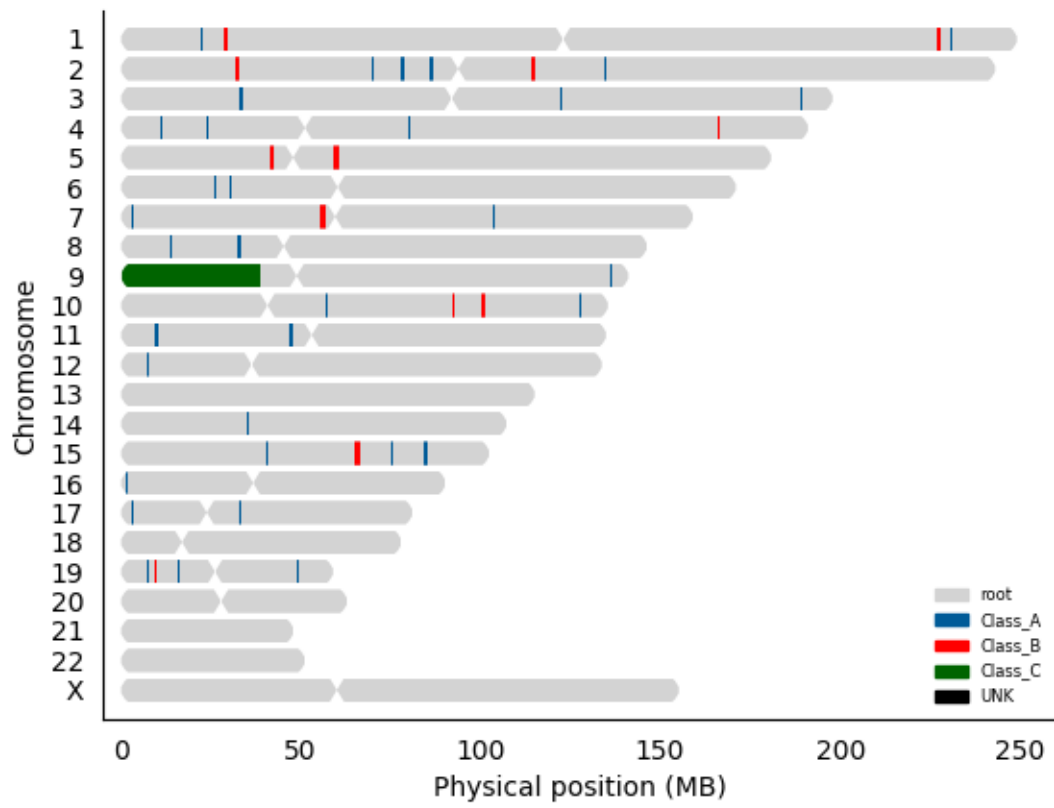

### Putative UPD16

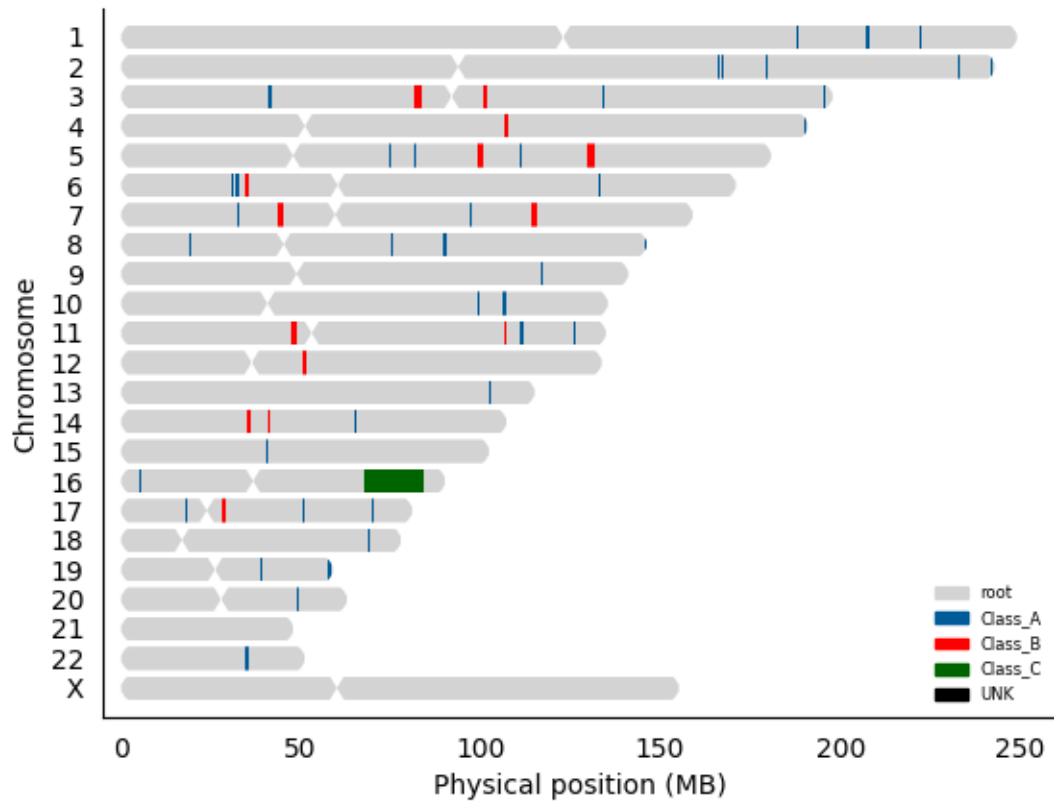

### Putative UPDX

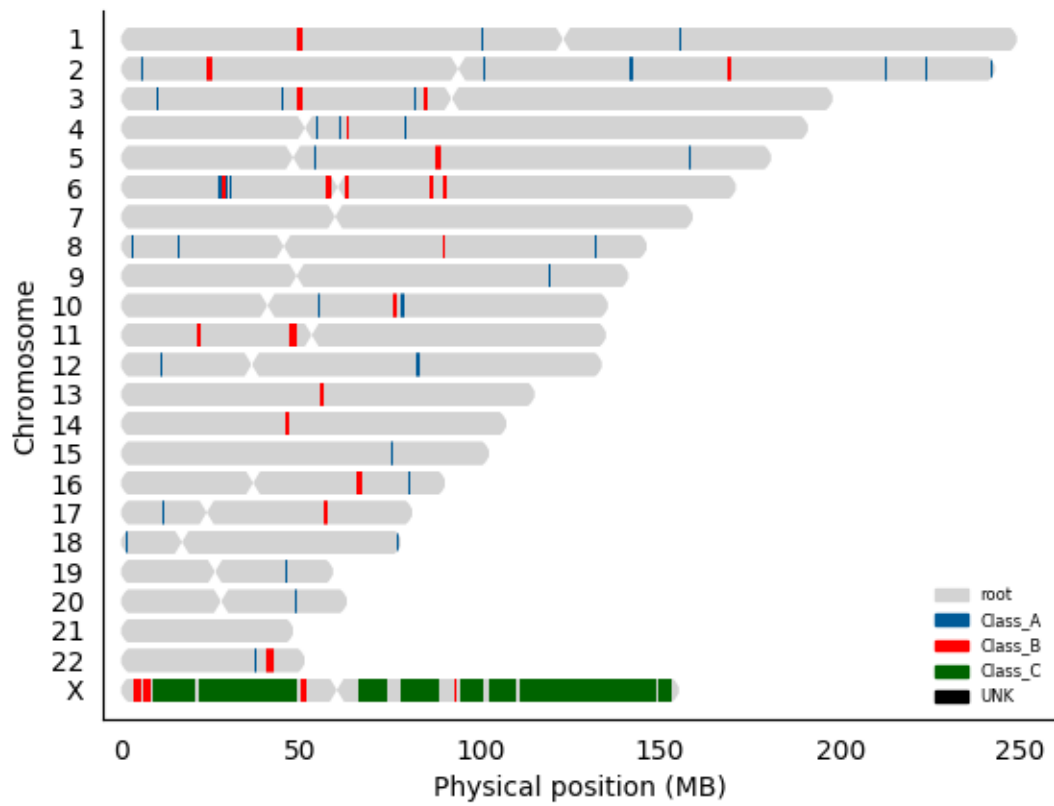

### Putative UPD16

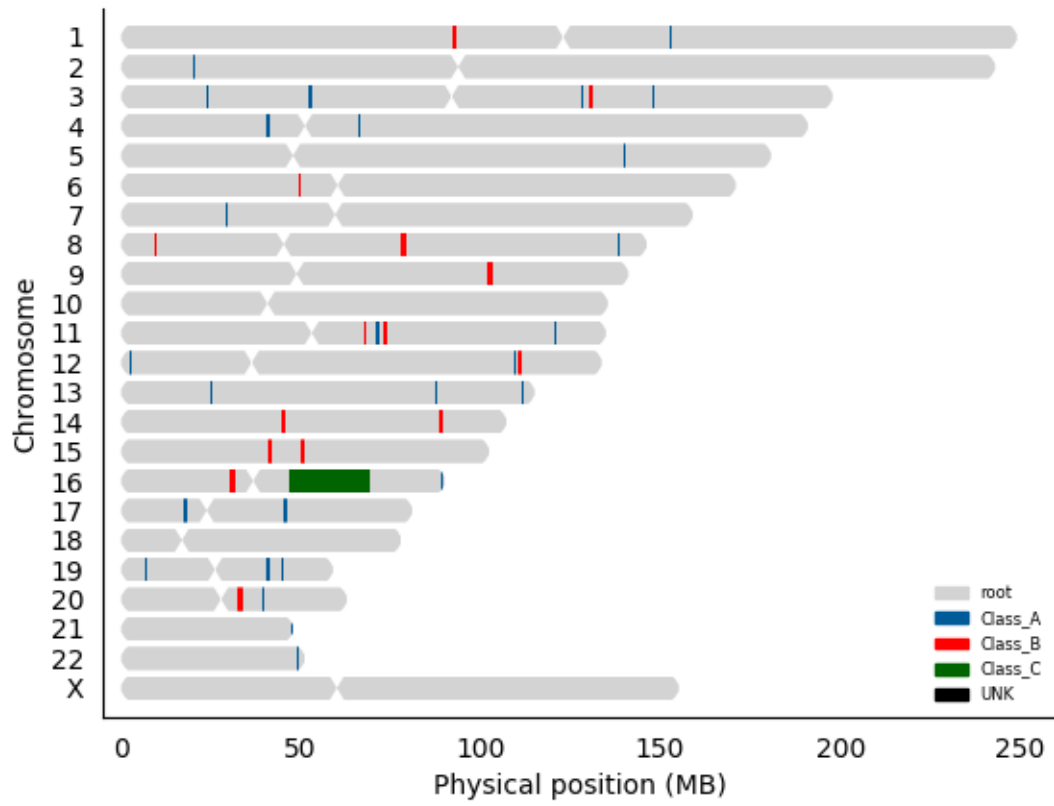

### Putative UPD9

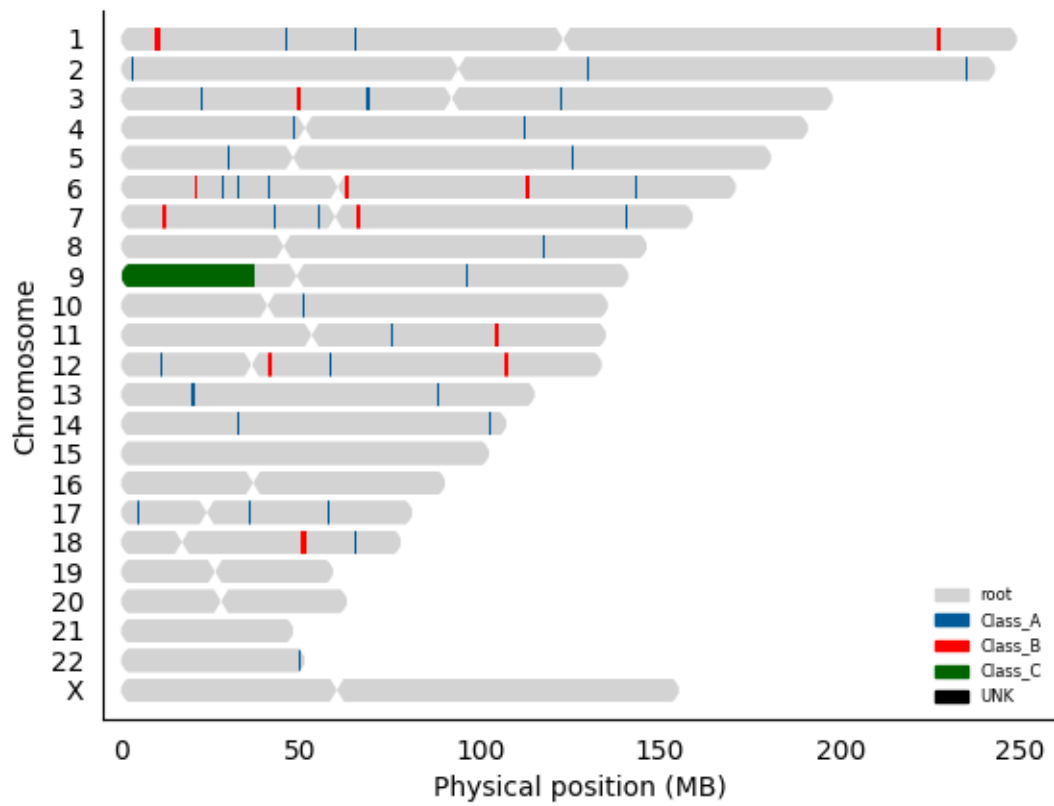

### Putative UPD16

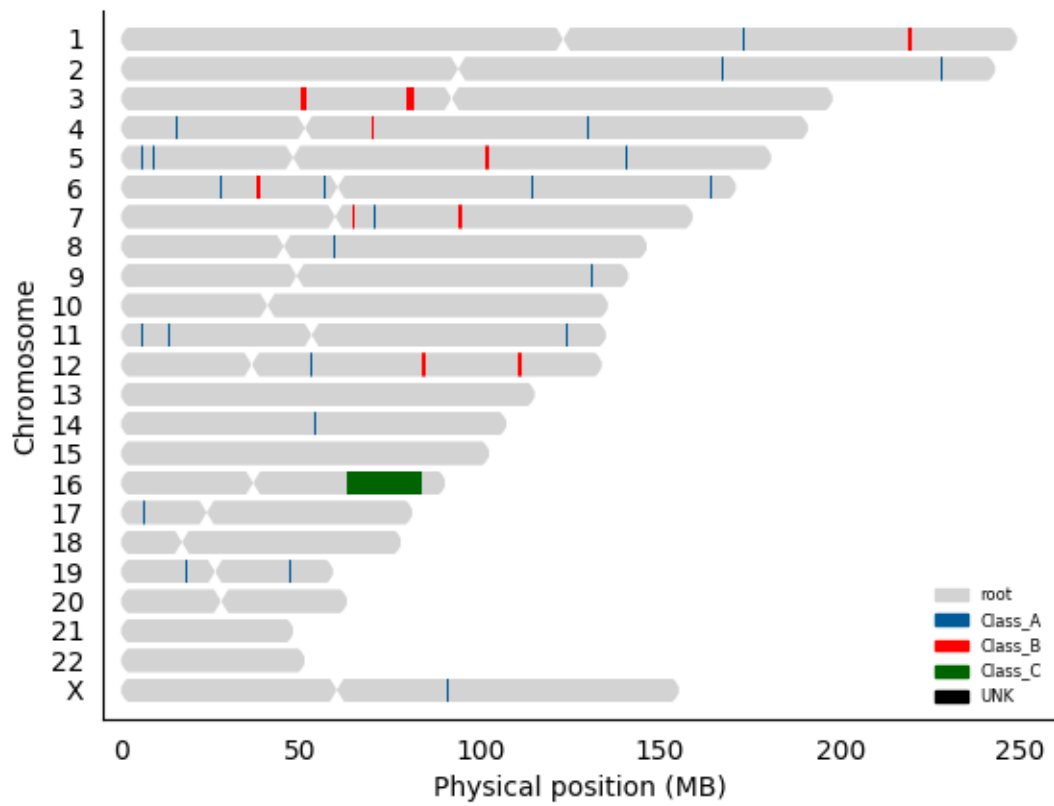

### Putative UPDX

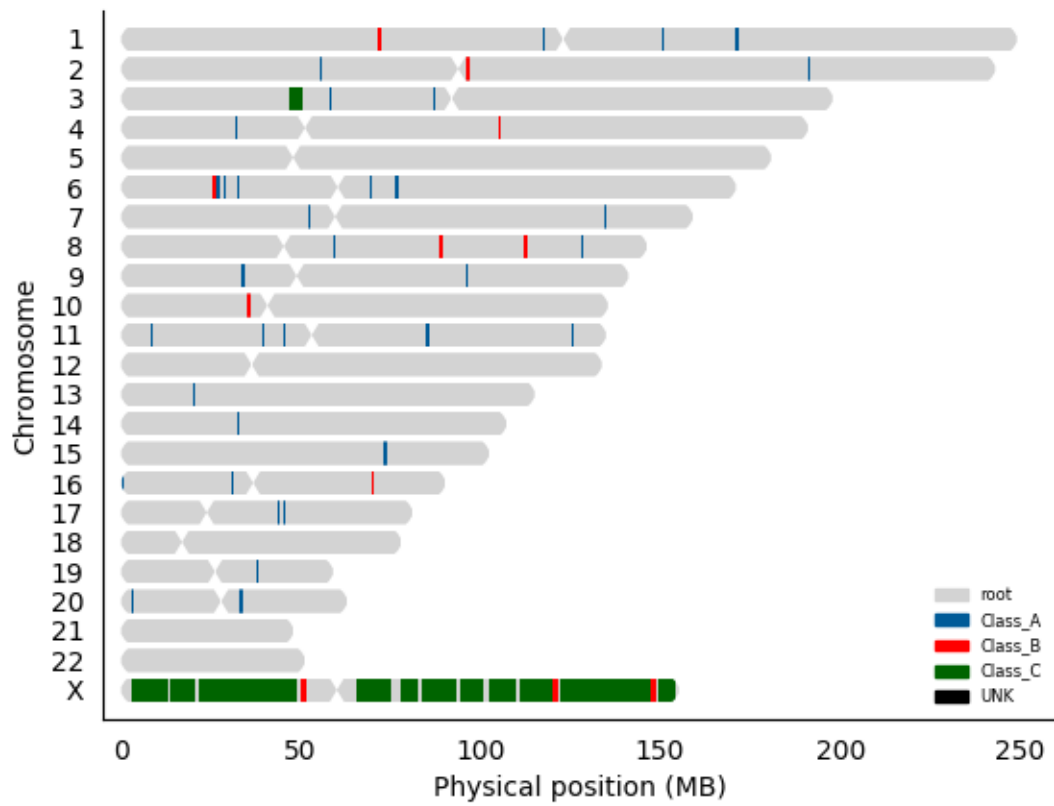

### Putative UPD9

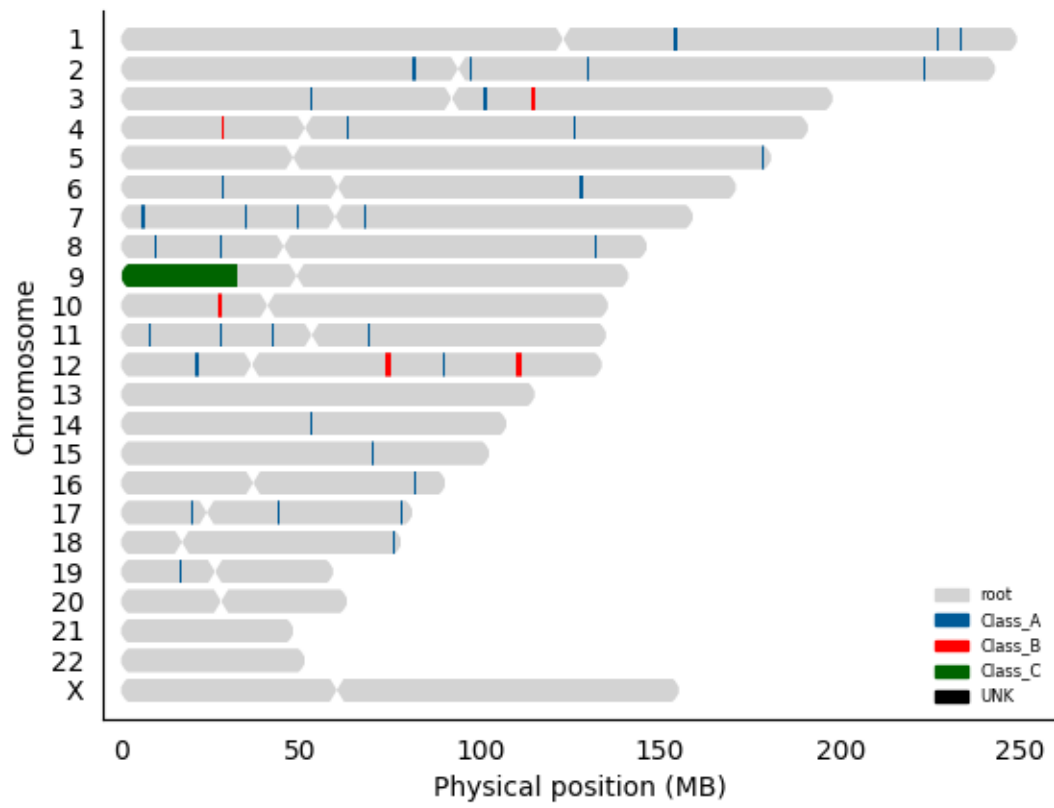



### Putative UPDX

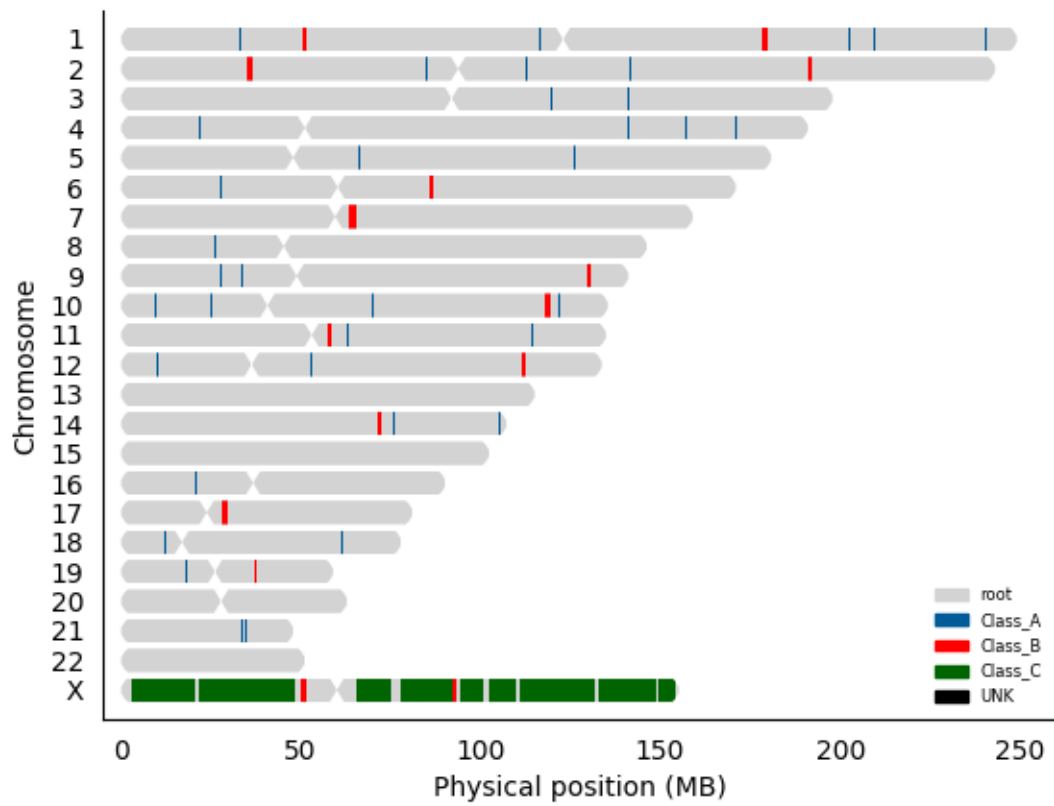

### Putative UPD8

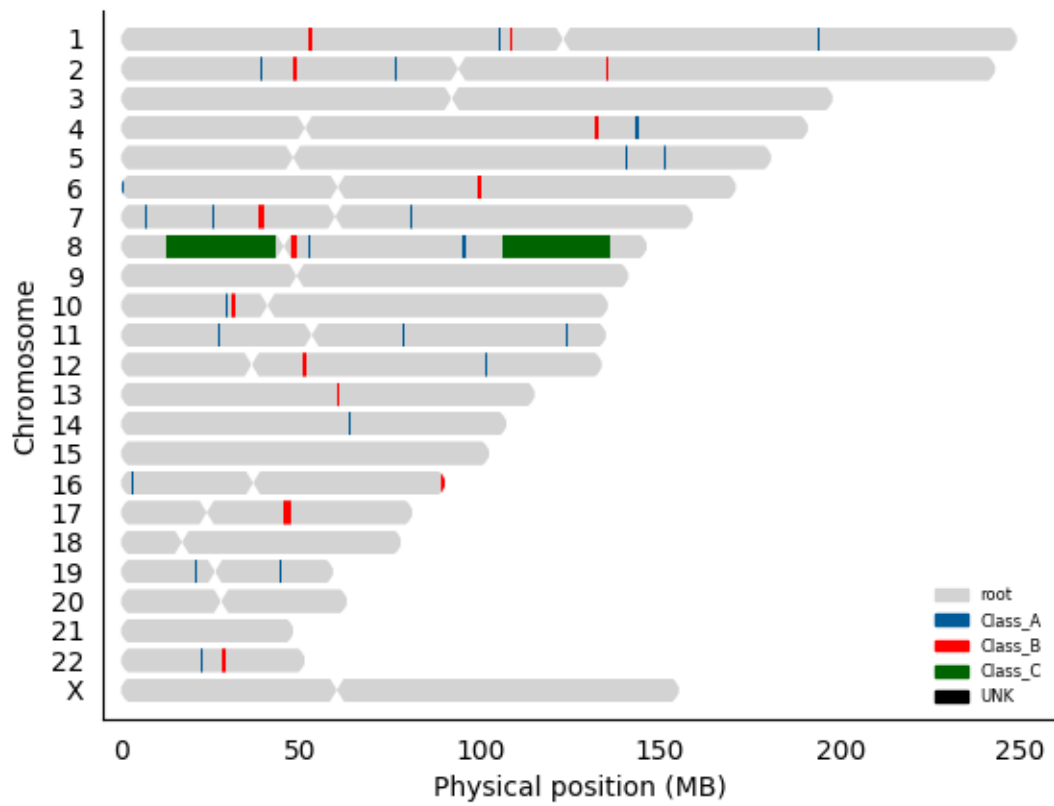

### Putative UPD16

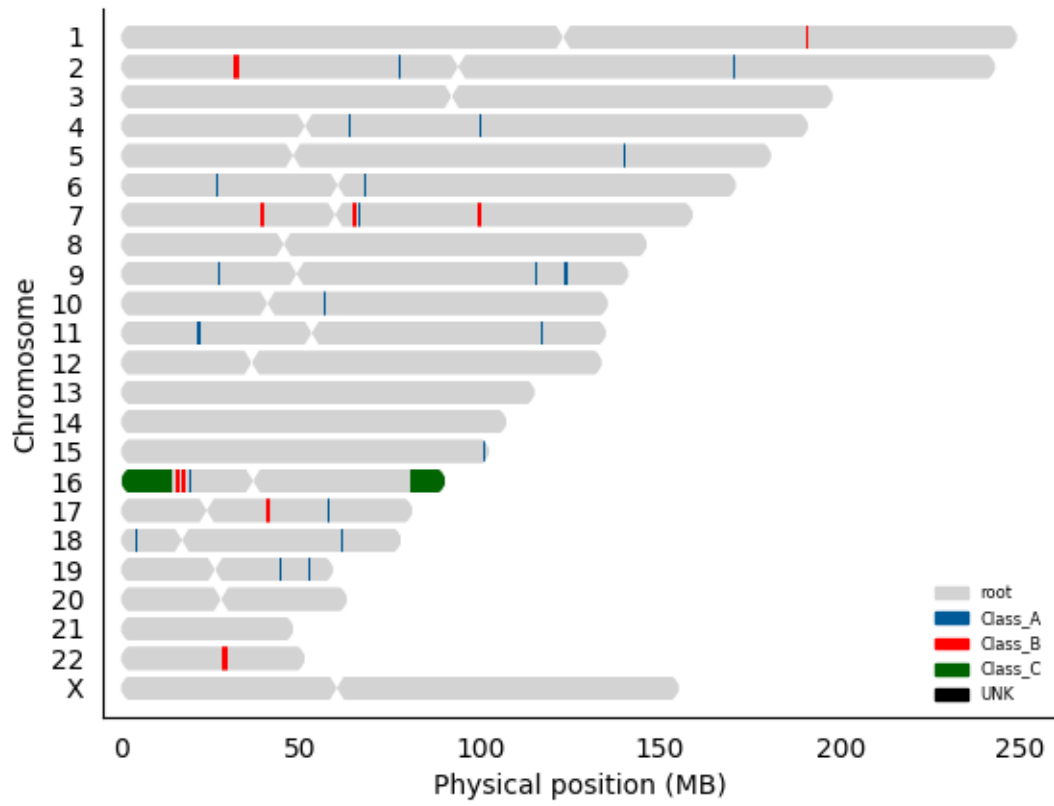

### Putative UPDX

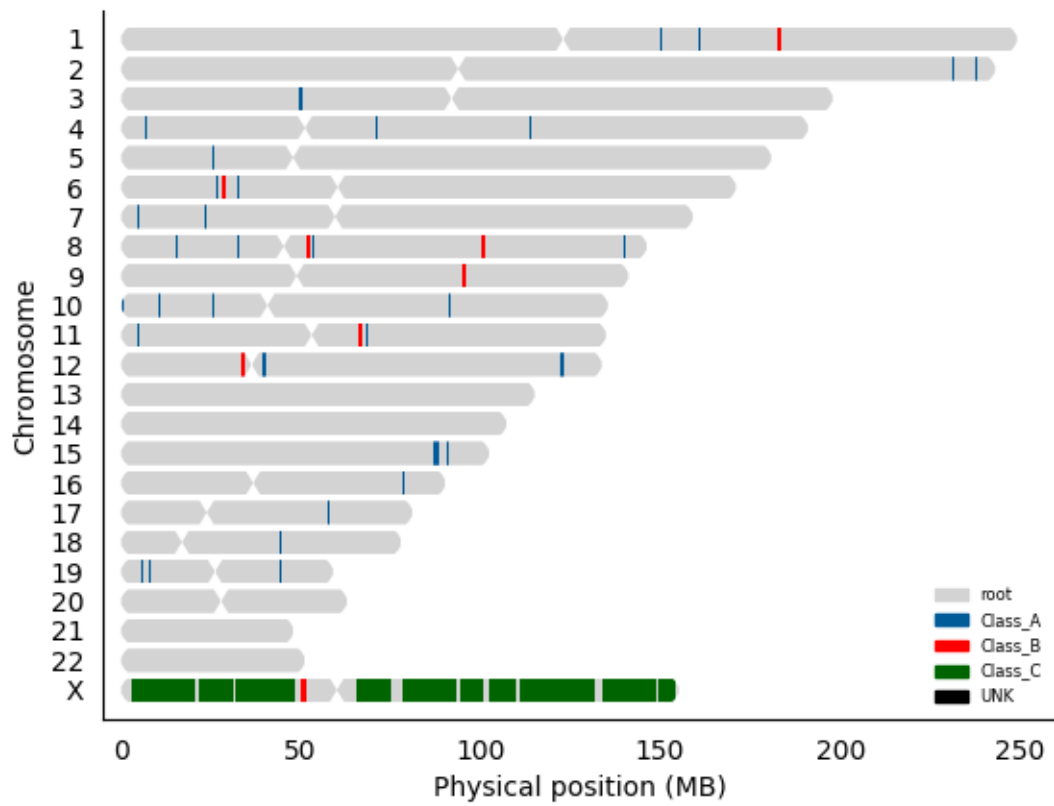

### Putative UPD16

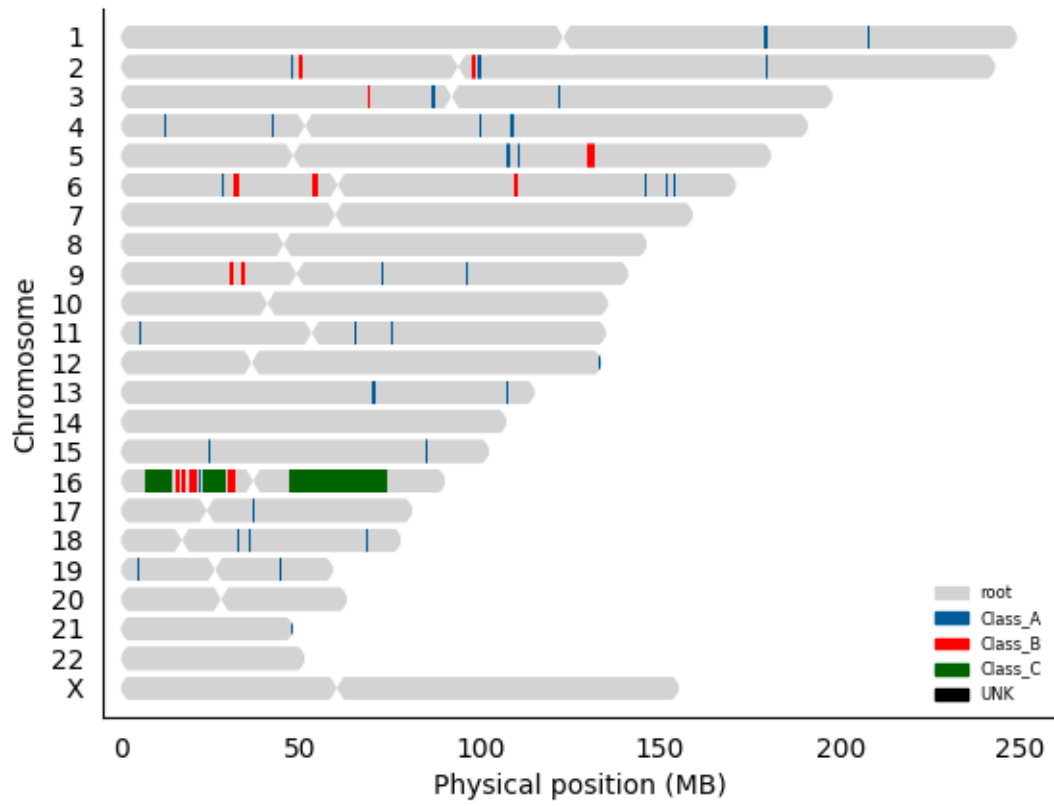

### Putative UPD8

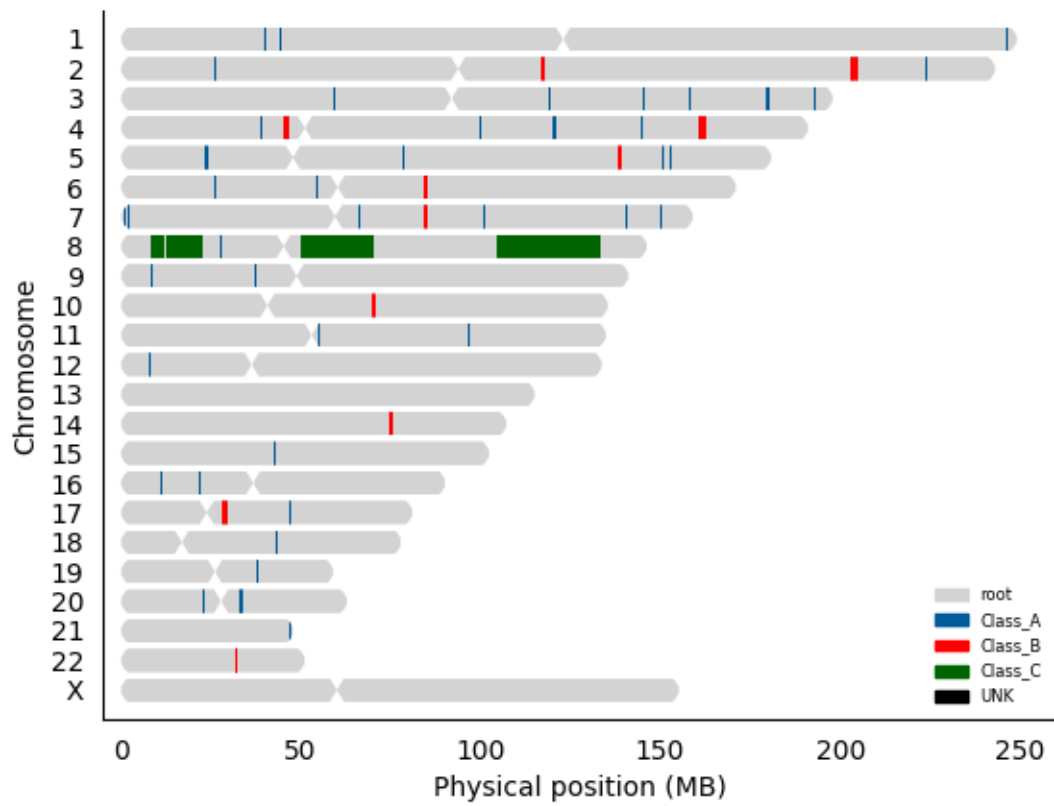

### Putative UPDX

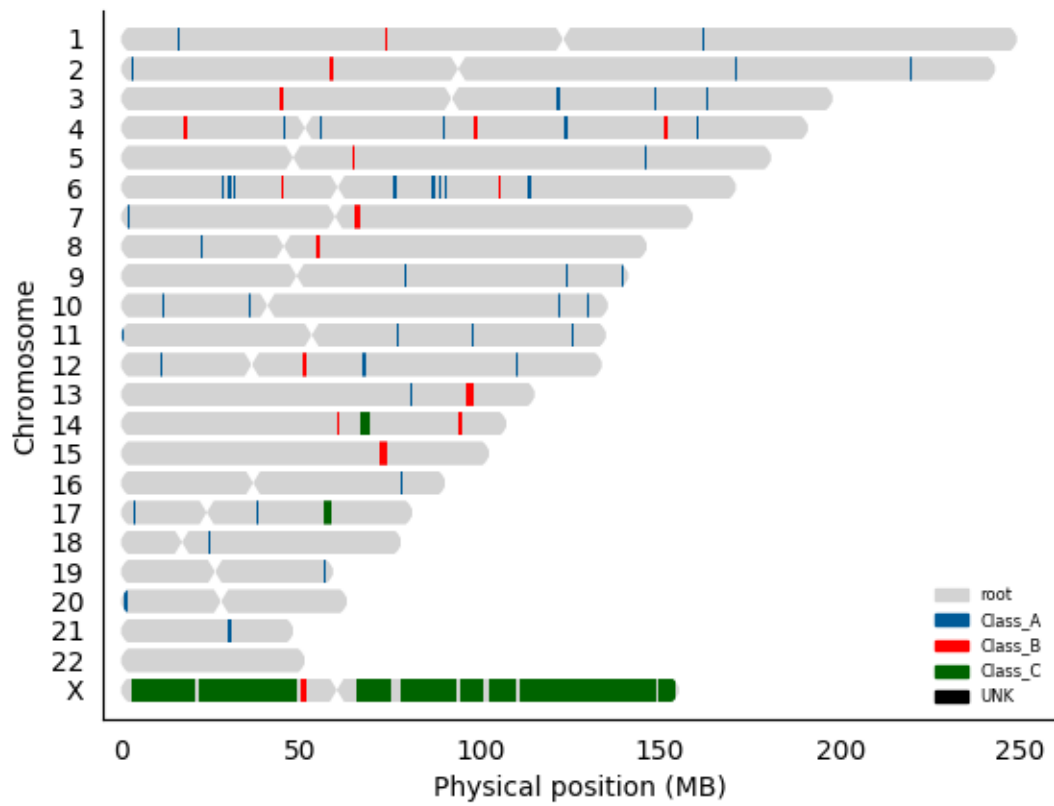

### Putative UPD16

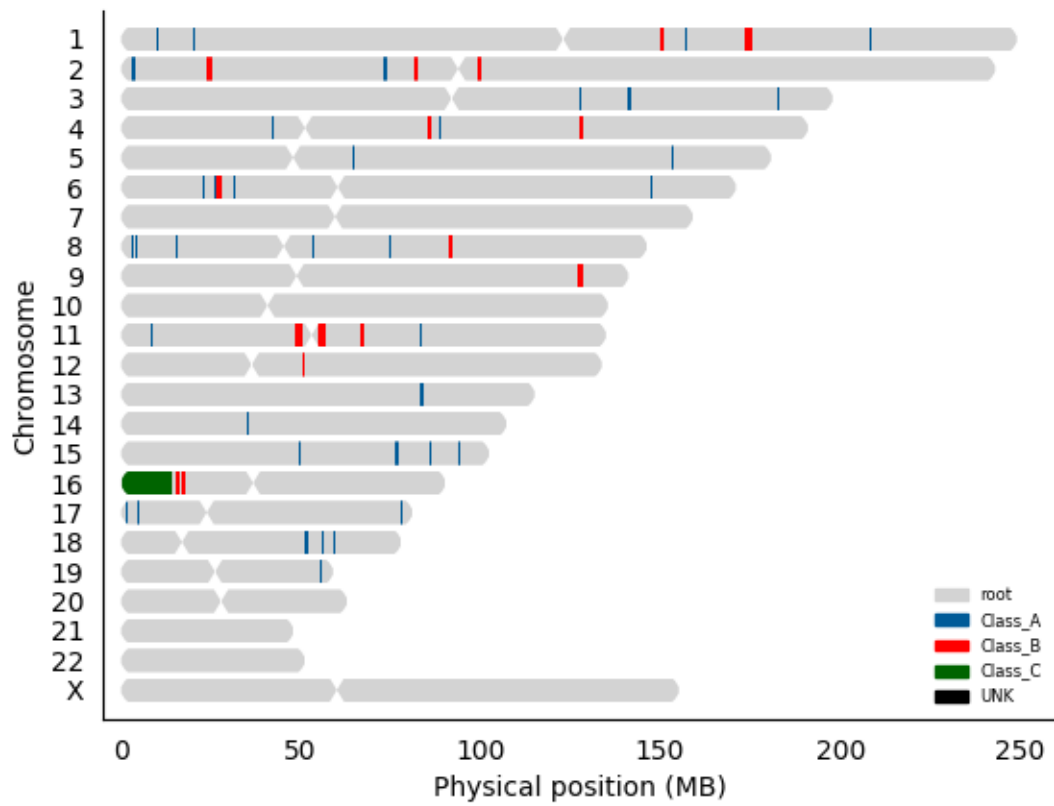



### Putative UPD8

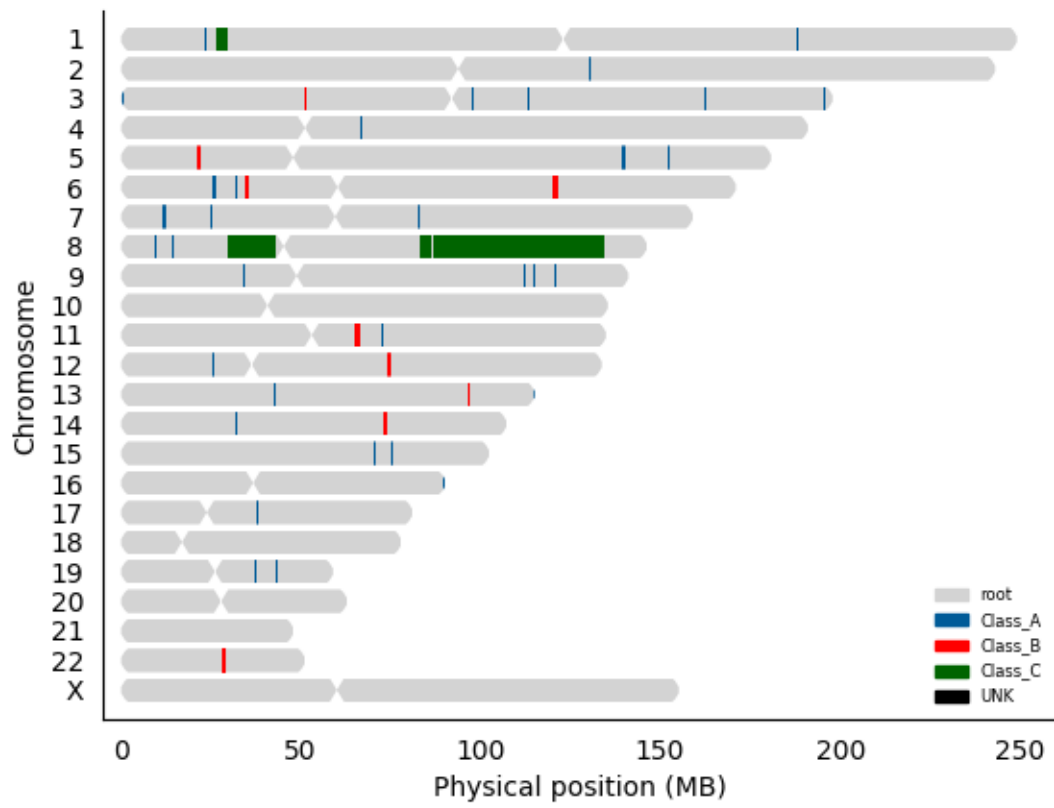

### Putative UPDX

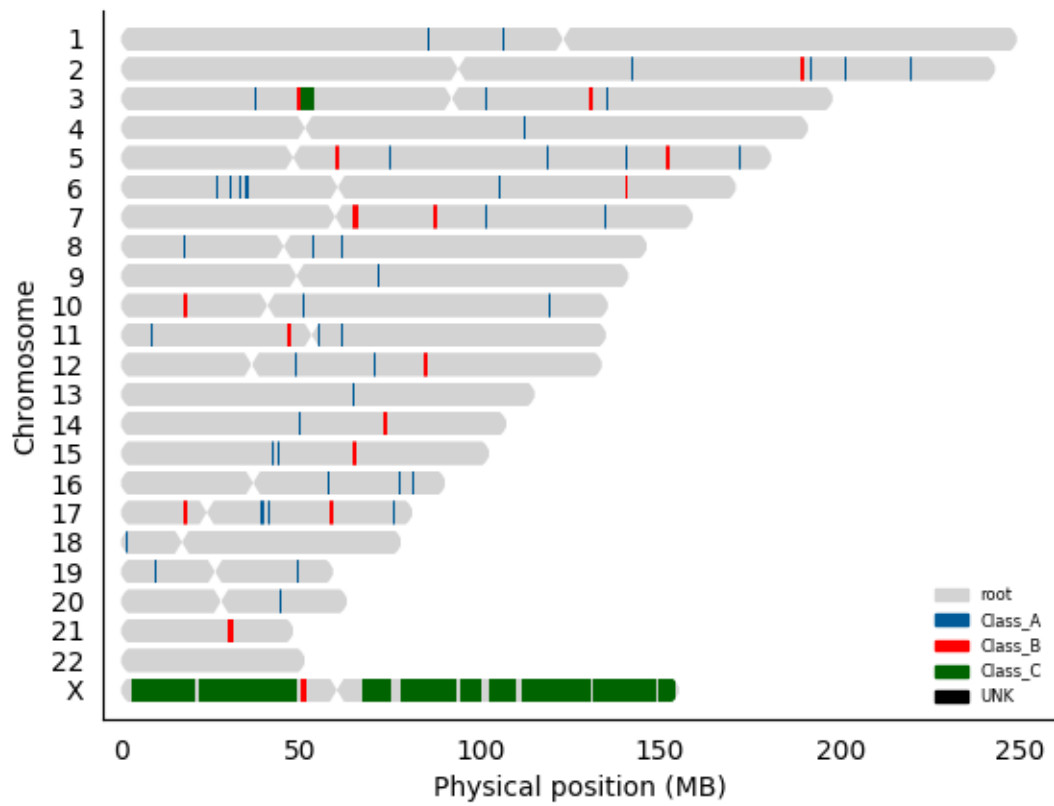

### Putative UPD7

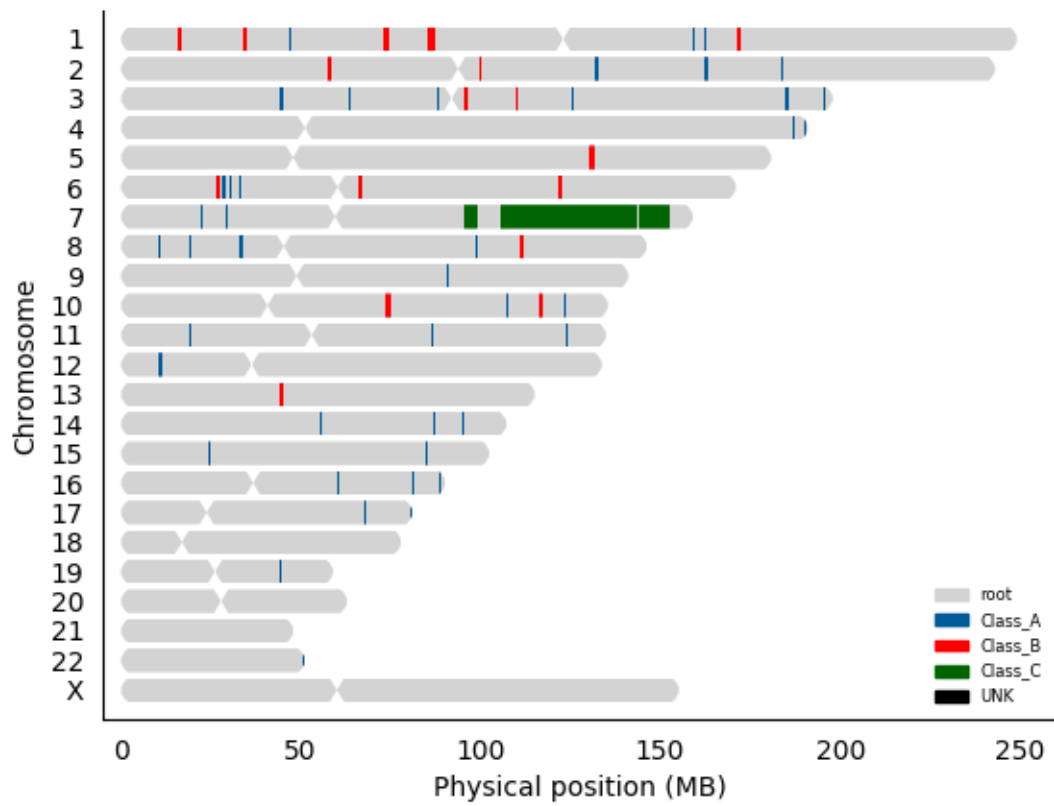

### Putative UPD16

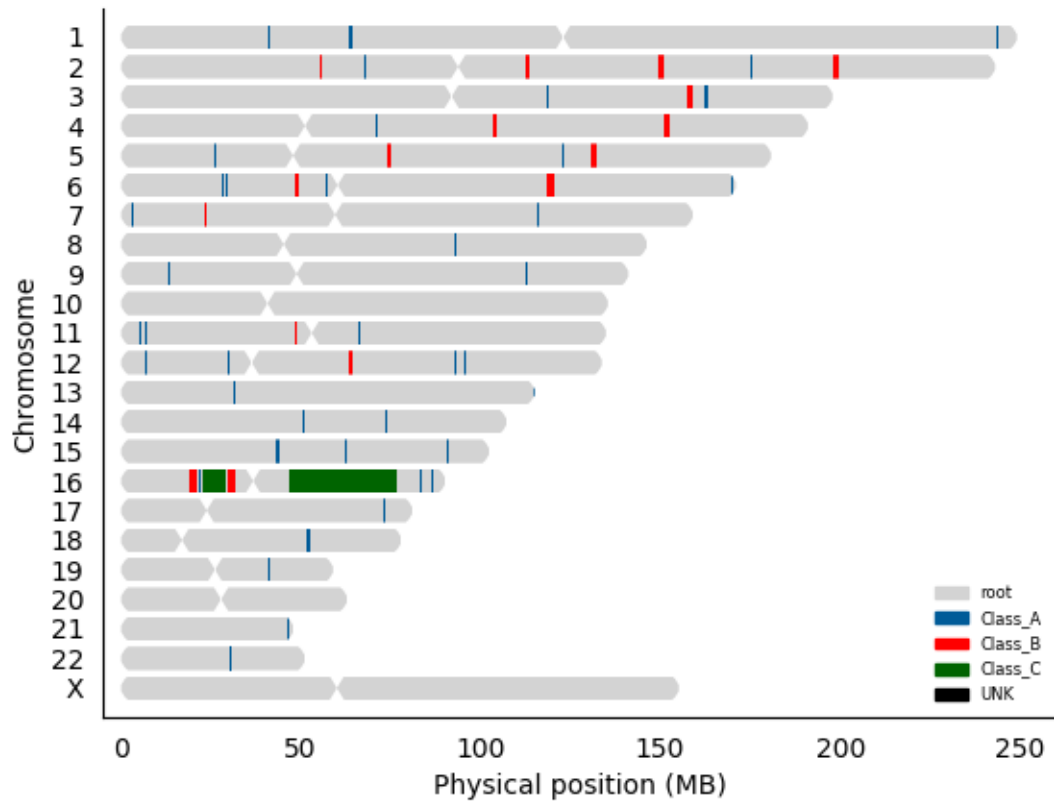

### Putative UPDX

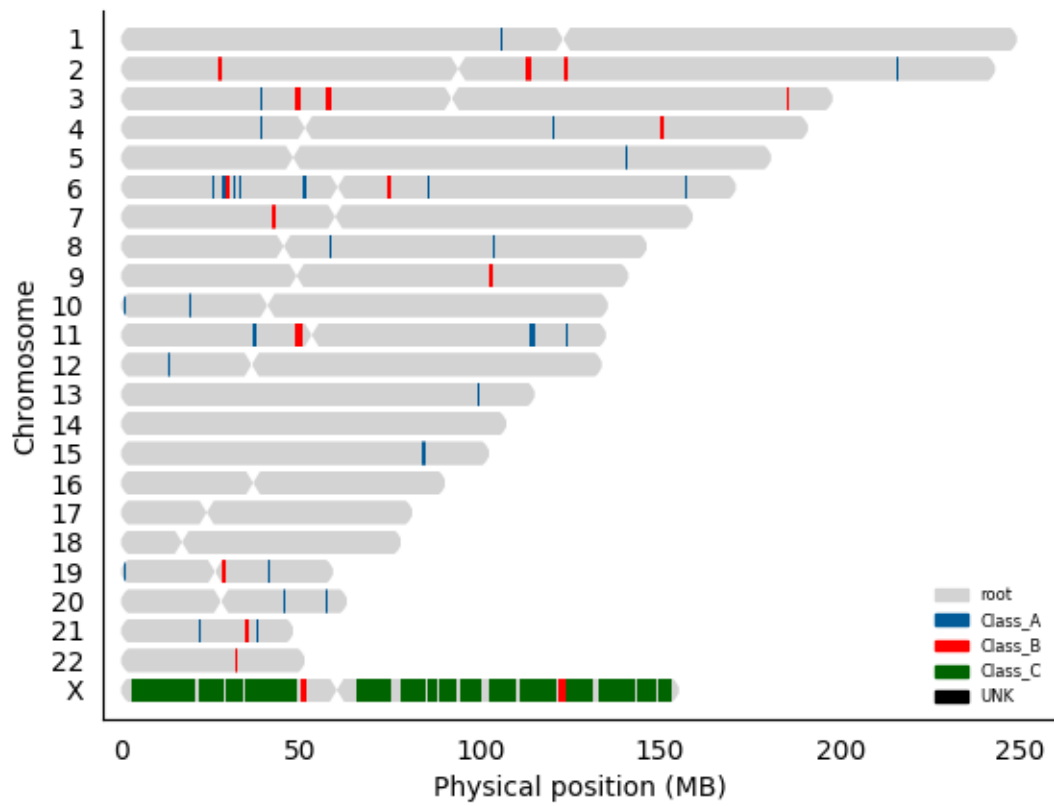

### Putative UPD16

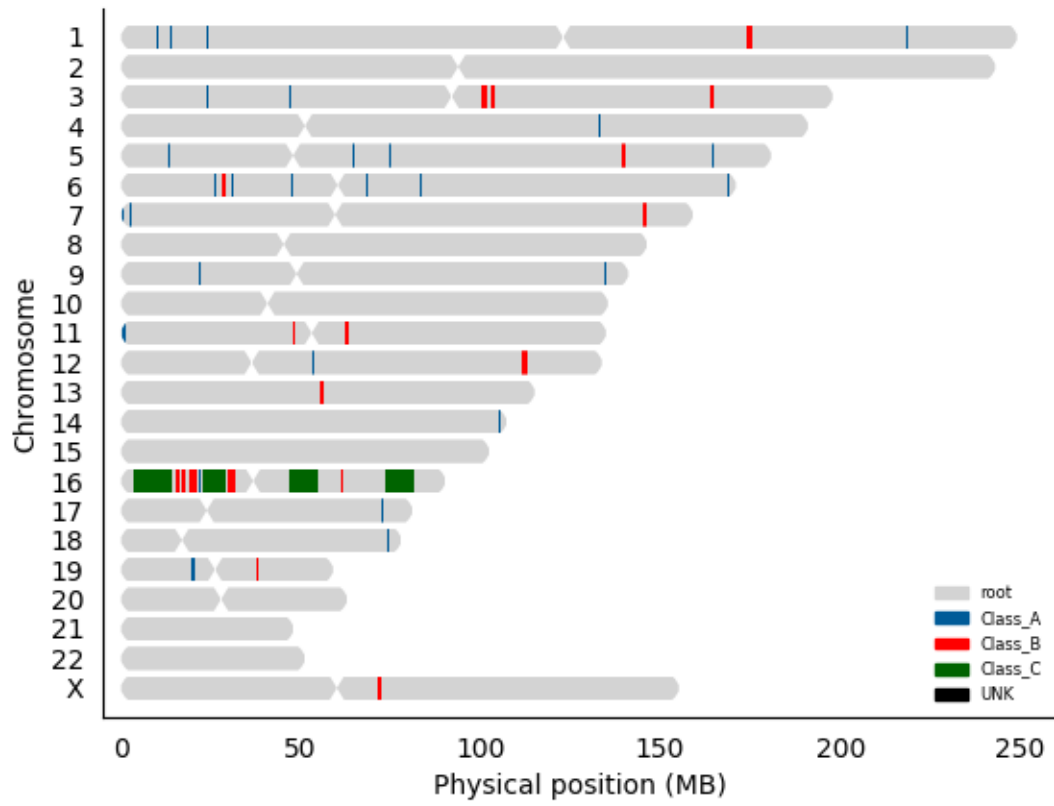

### Putative UPD7

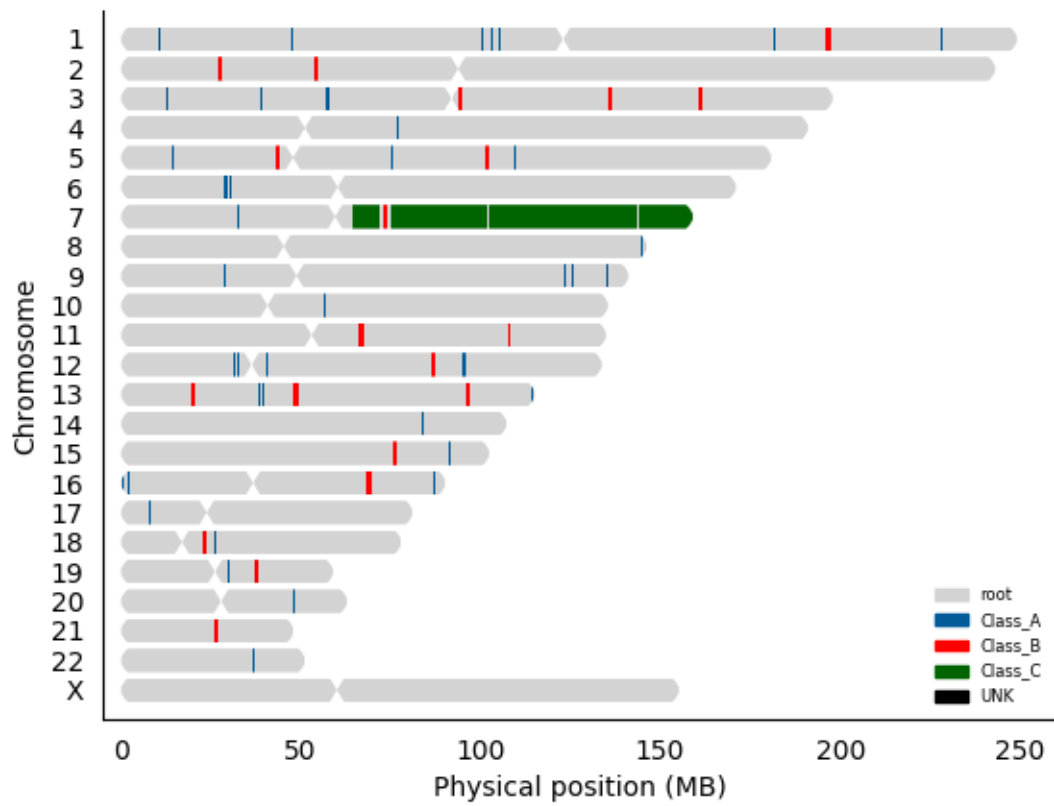

### Putative UPD16

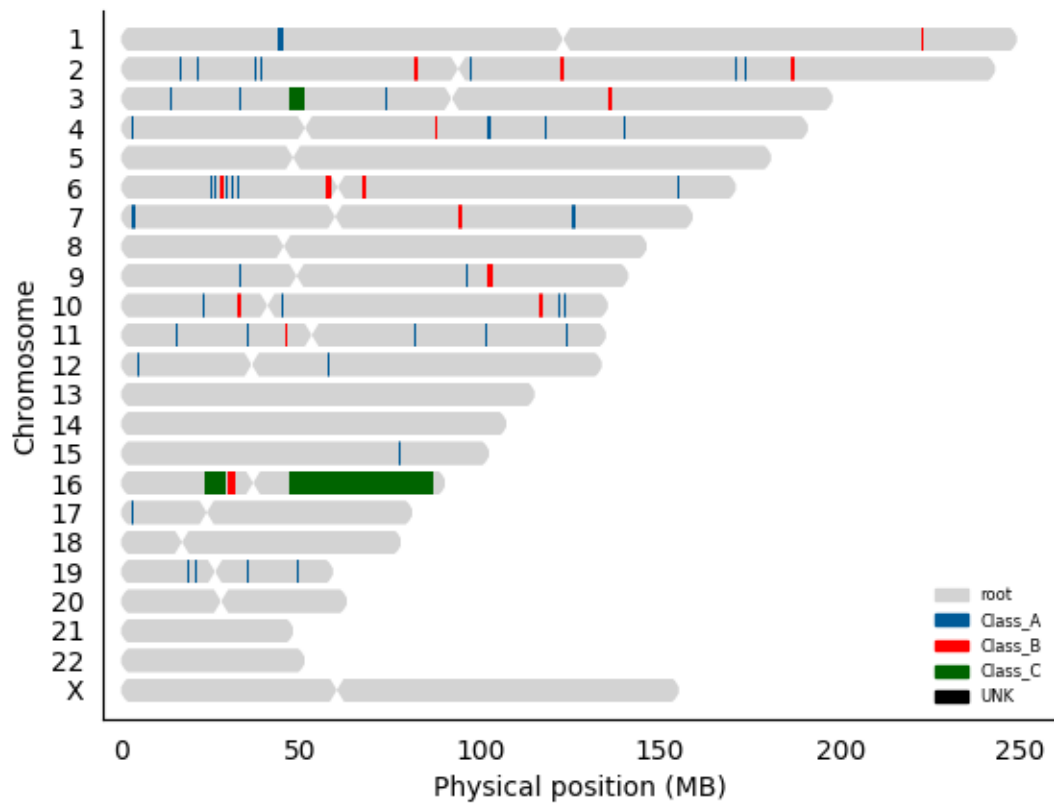



### Putative UPDX

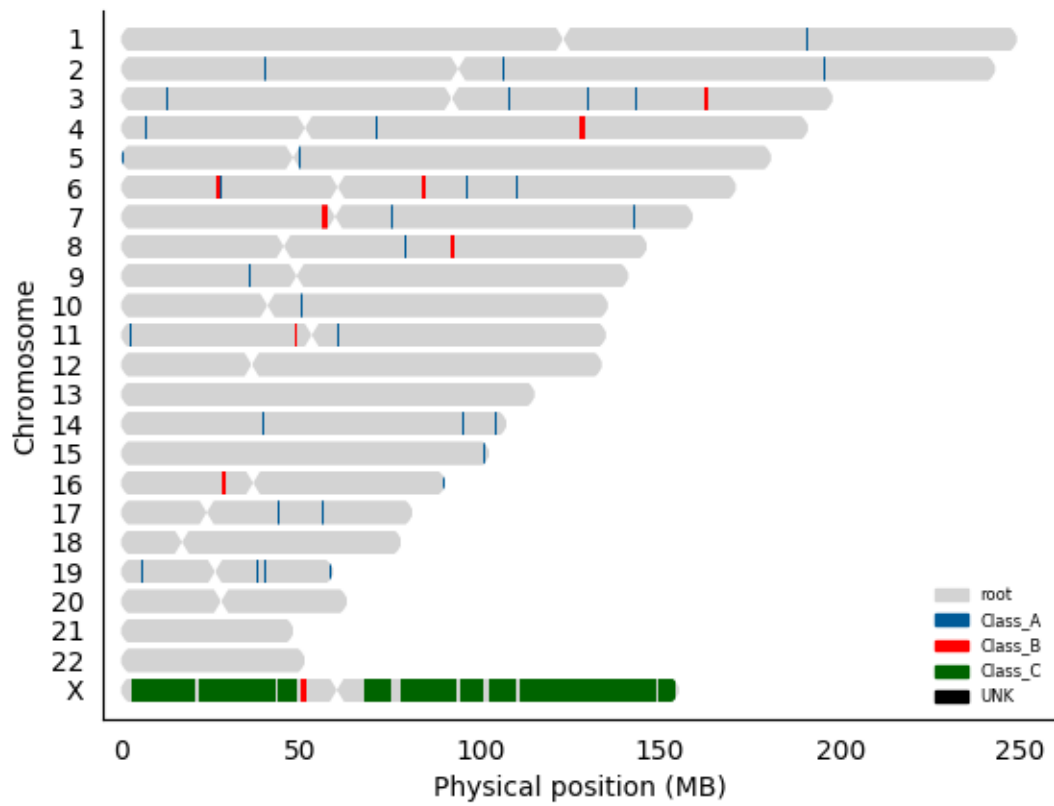

### Putative UPD7

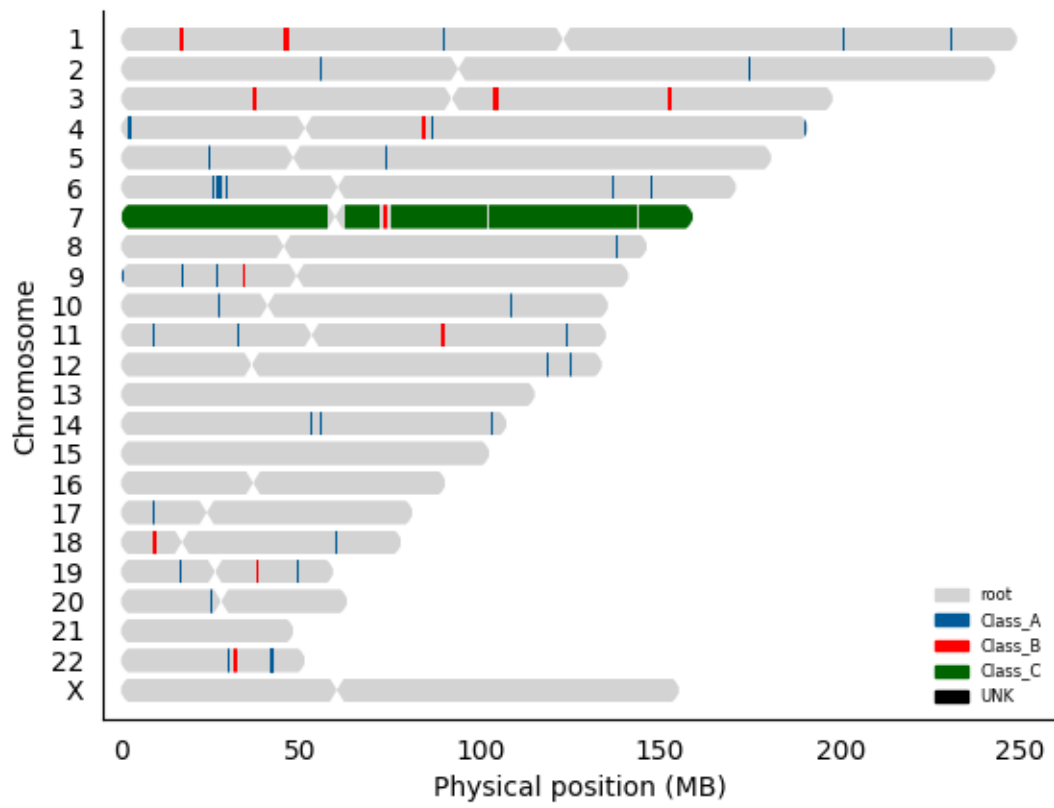

### Putative UPD2

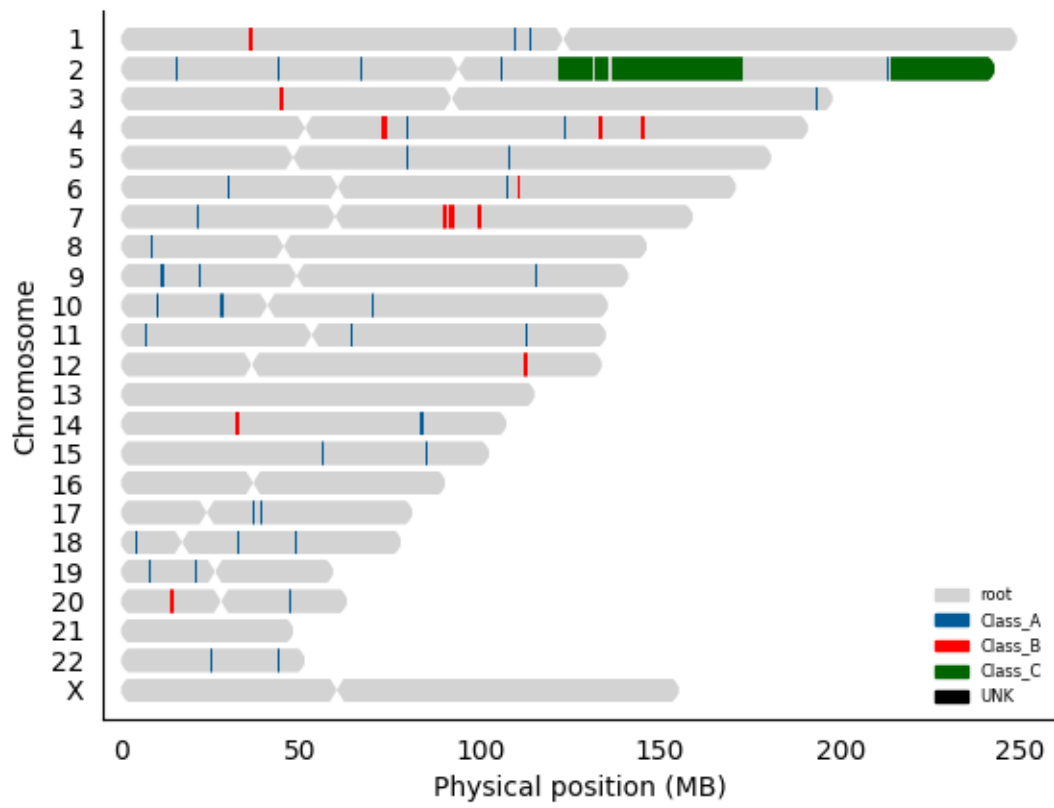

### Putative UPD6

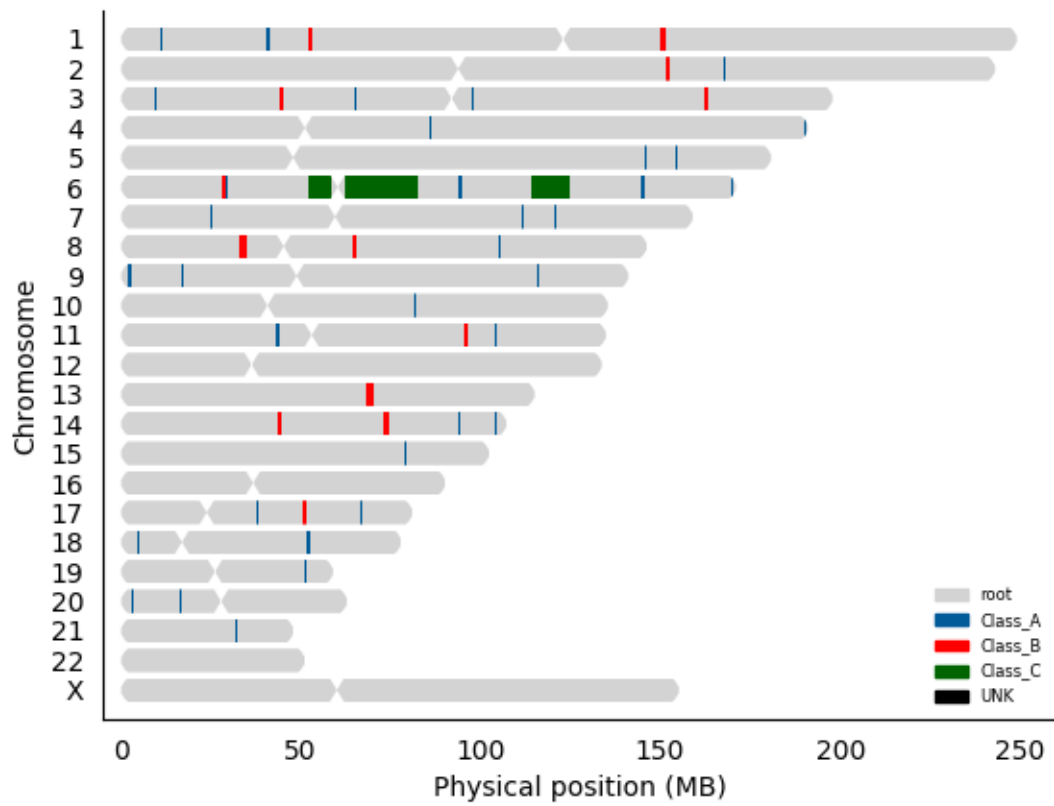

### Putative UPD16

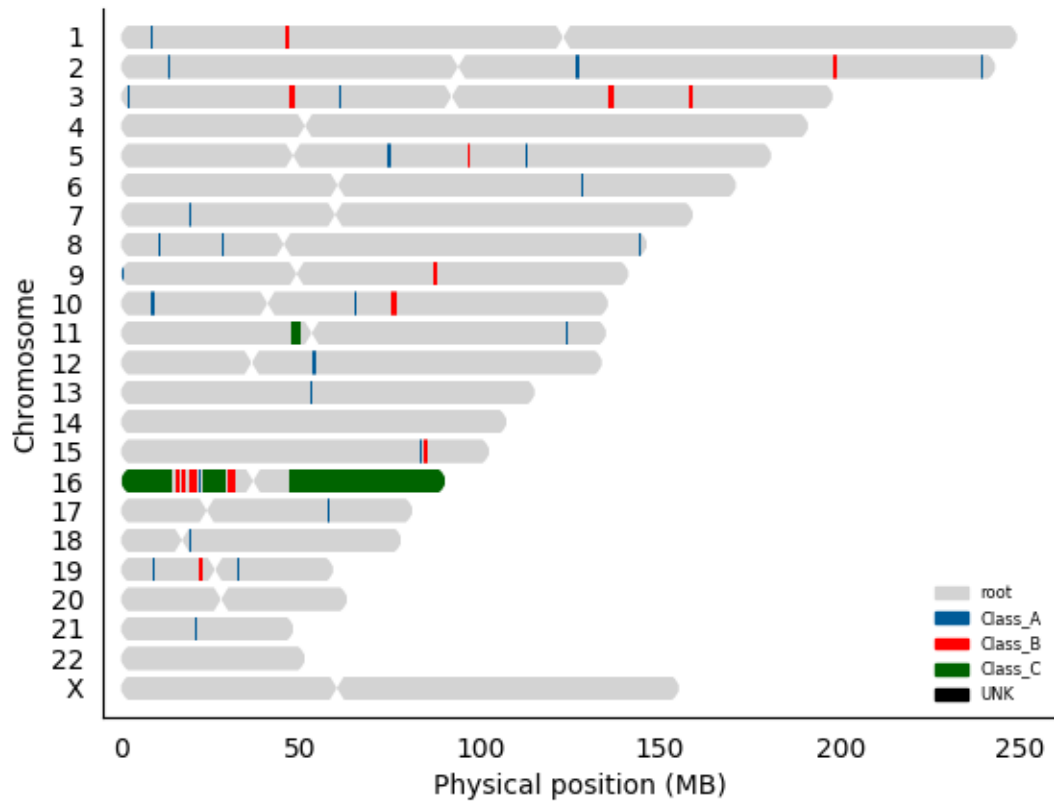

### Putative UPDX

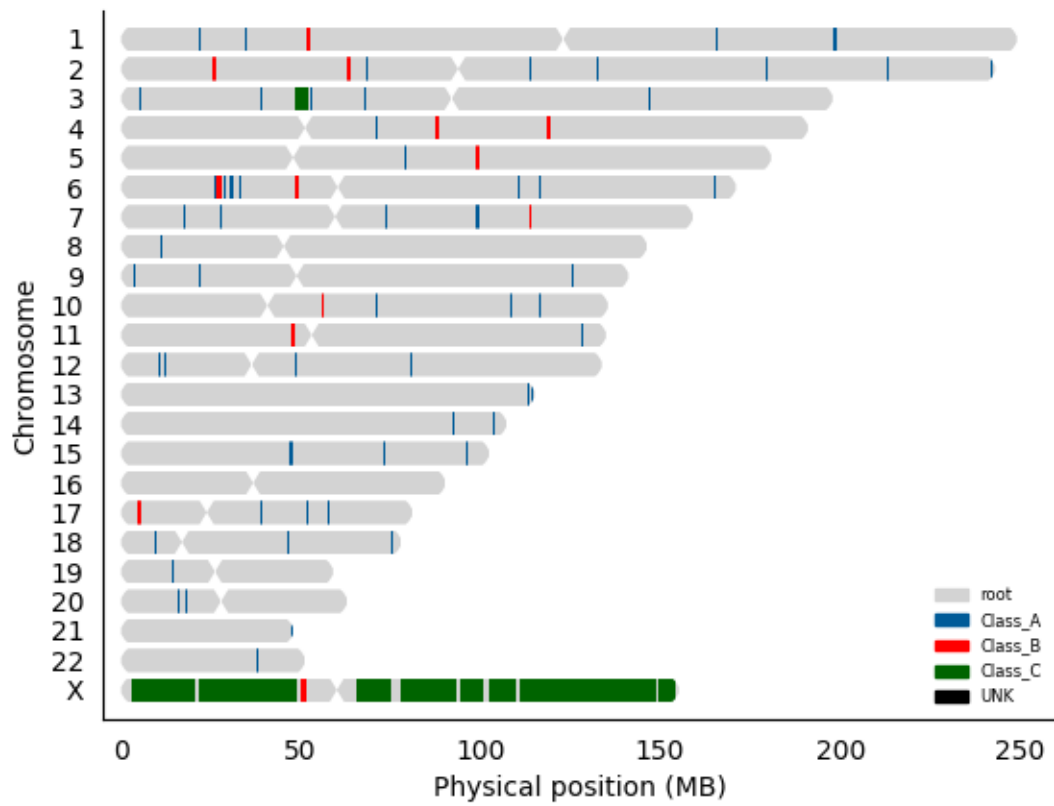

### Putative UPD1

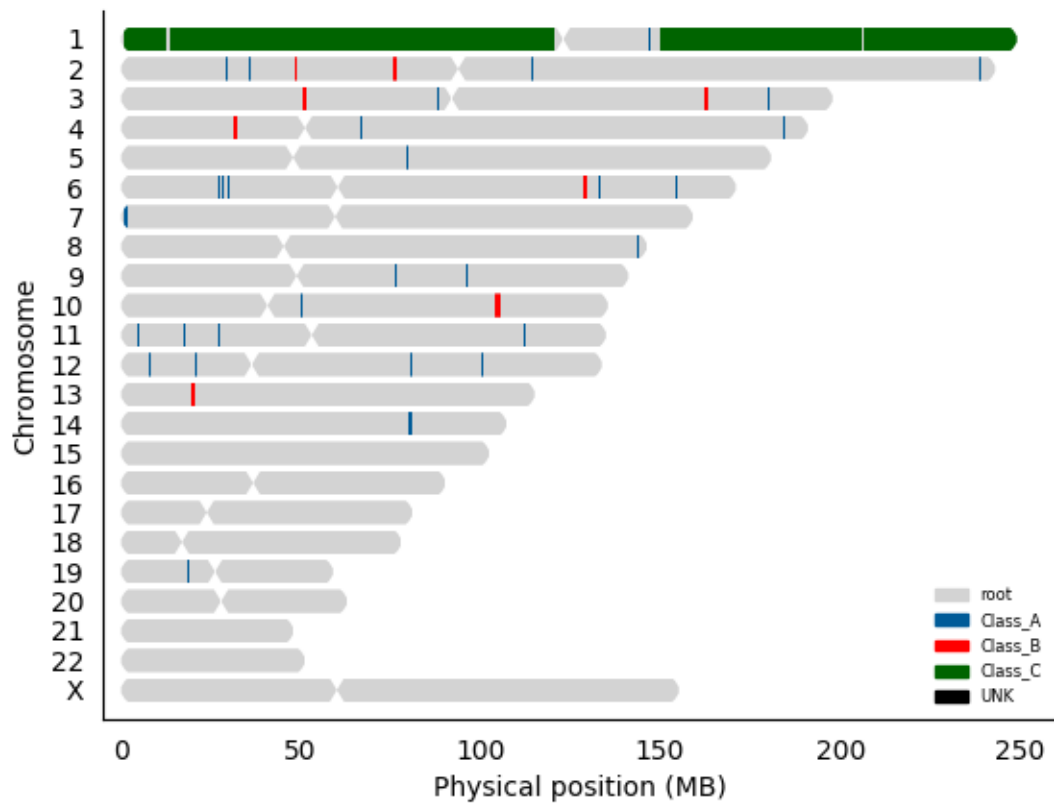

### Putative UPD6

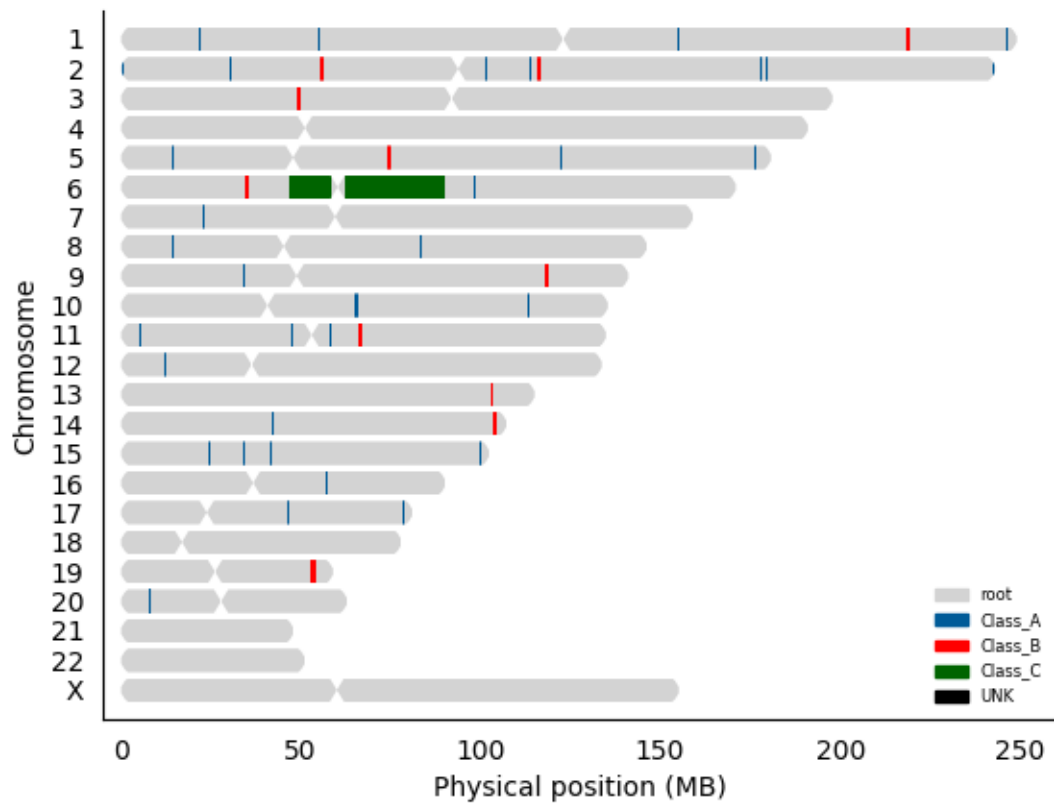



### Putative UPD1

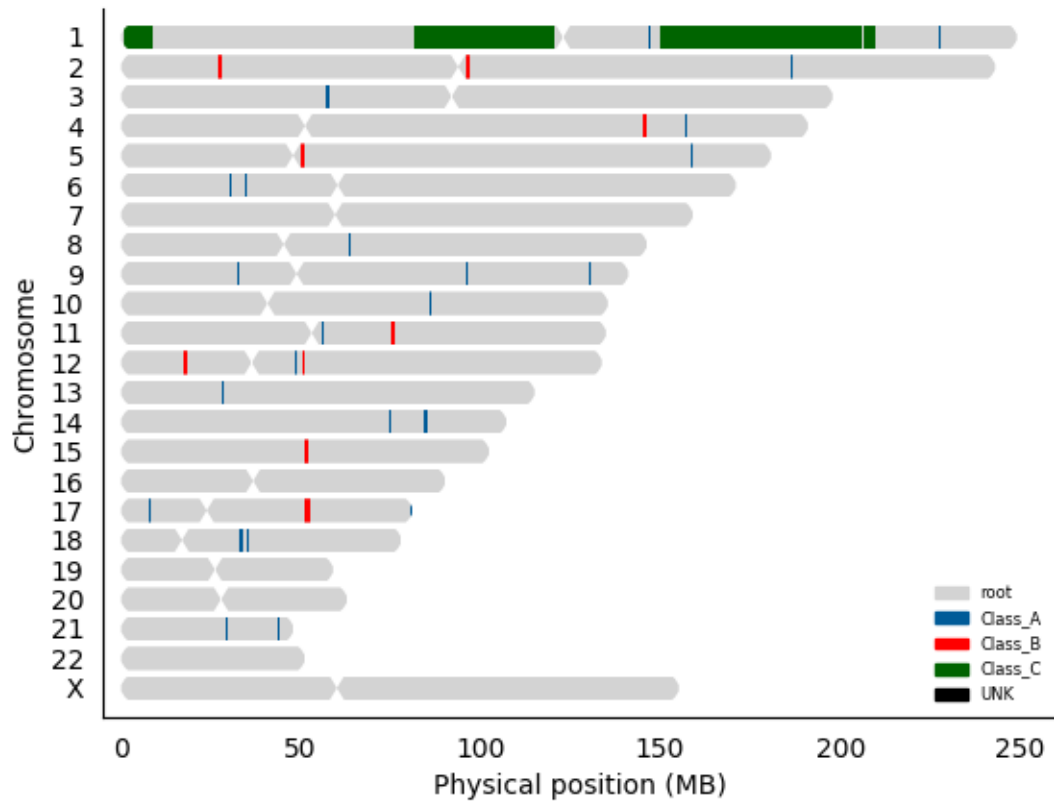

### Putative UPD2

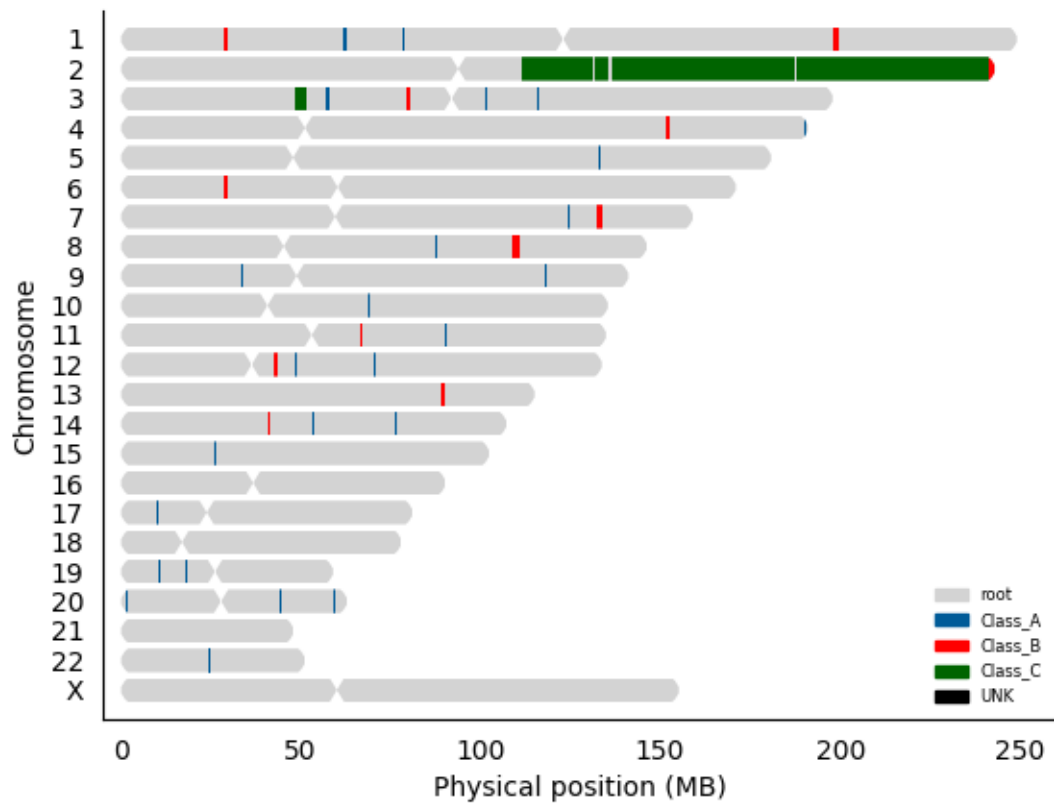

### Putative UPD5

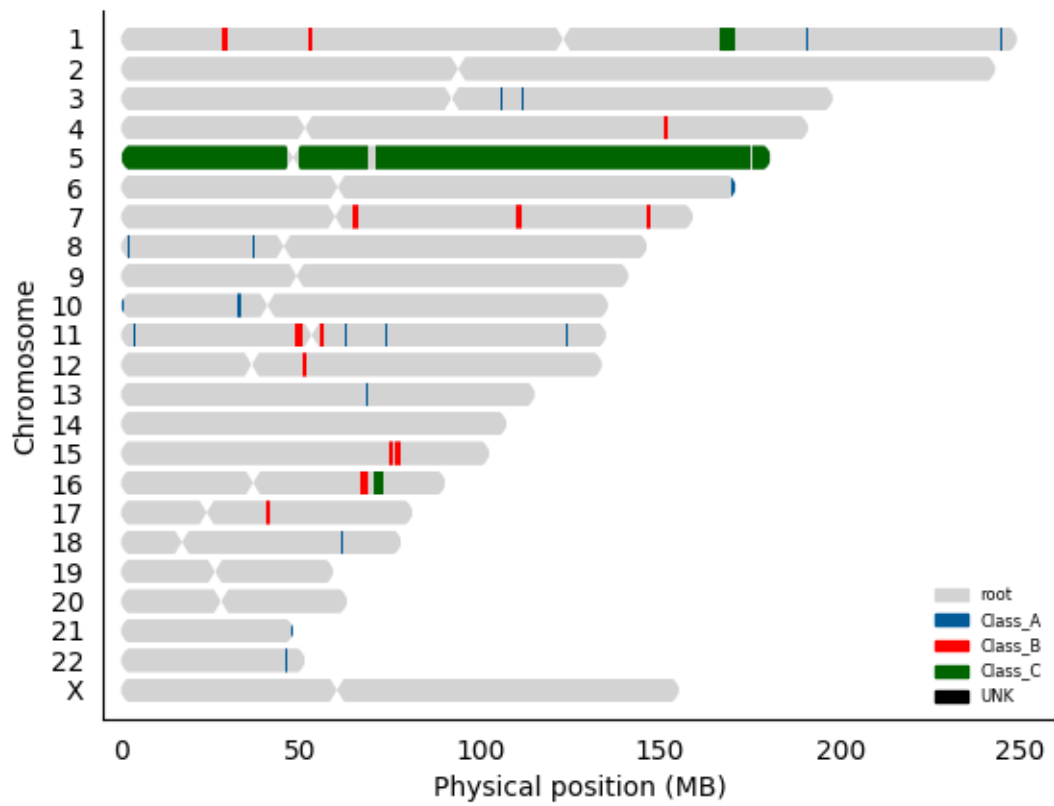

### Putative UPD15

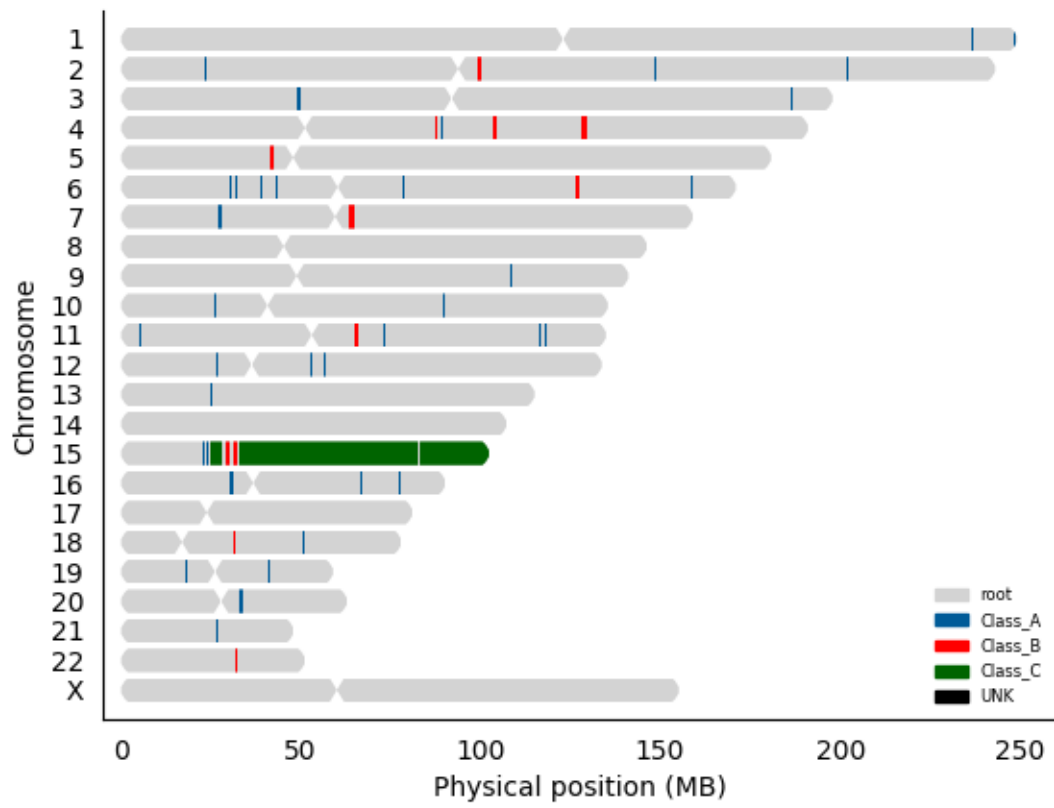

### Putative UPD22

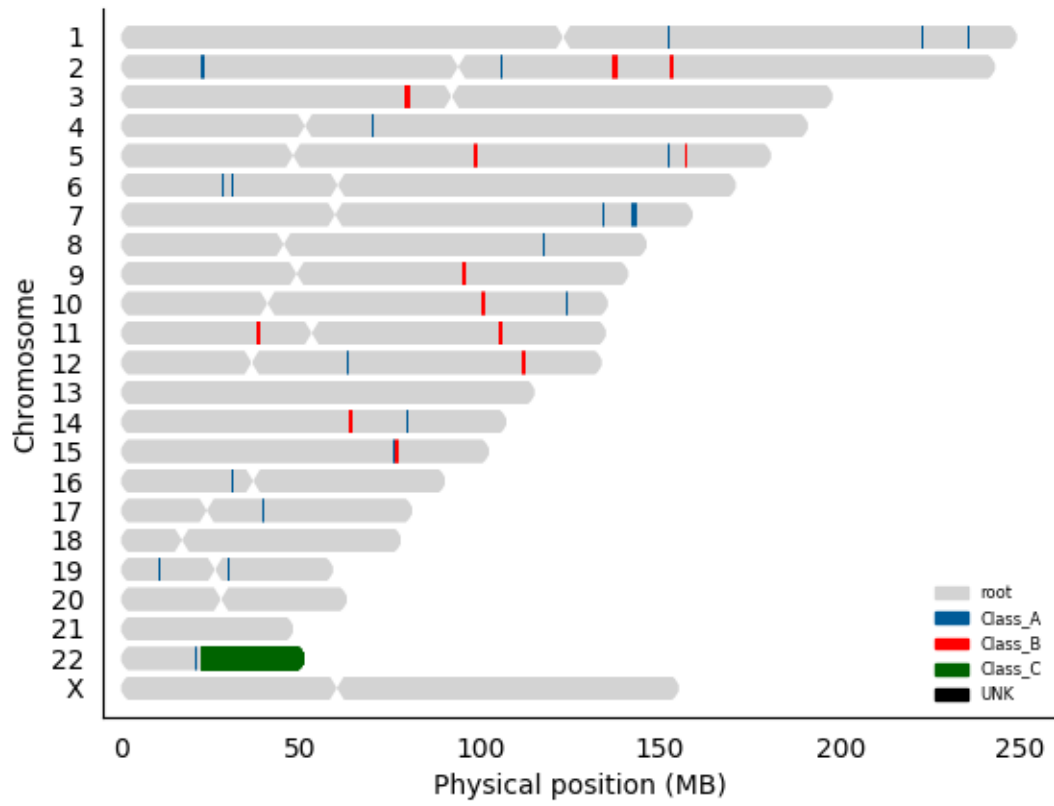

### Putative UPD5

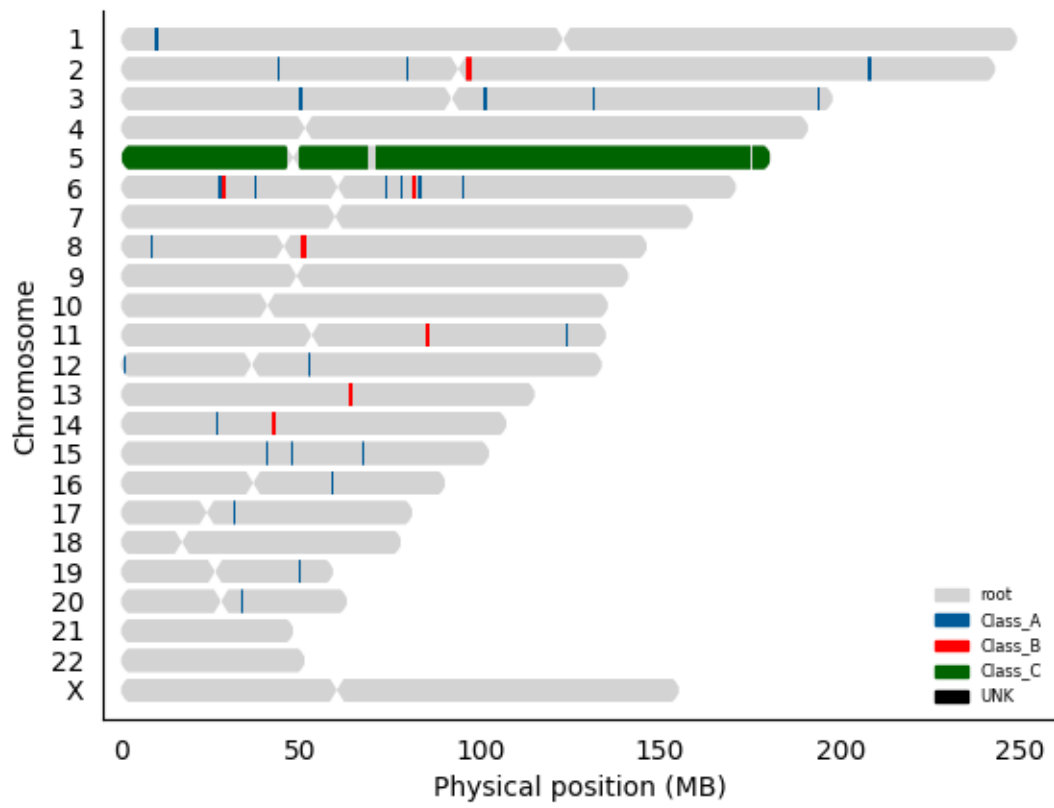

### Putative UPD22

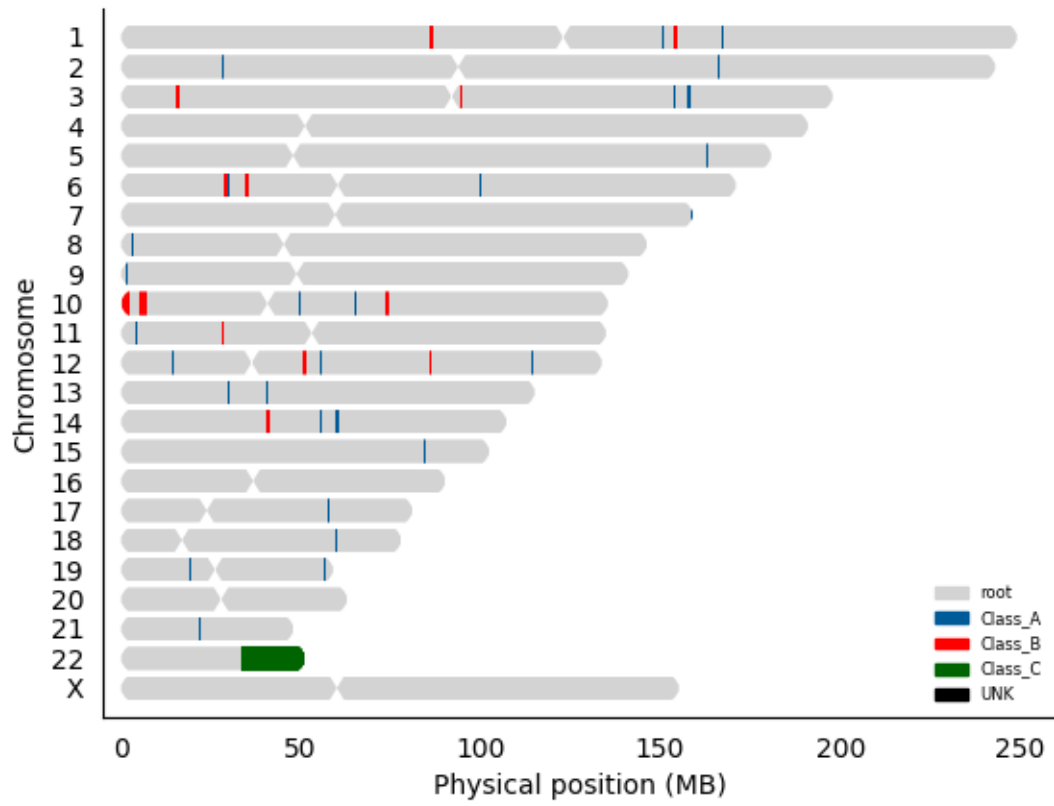

### Putative UPD5

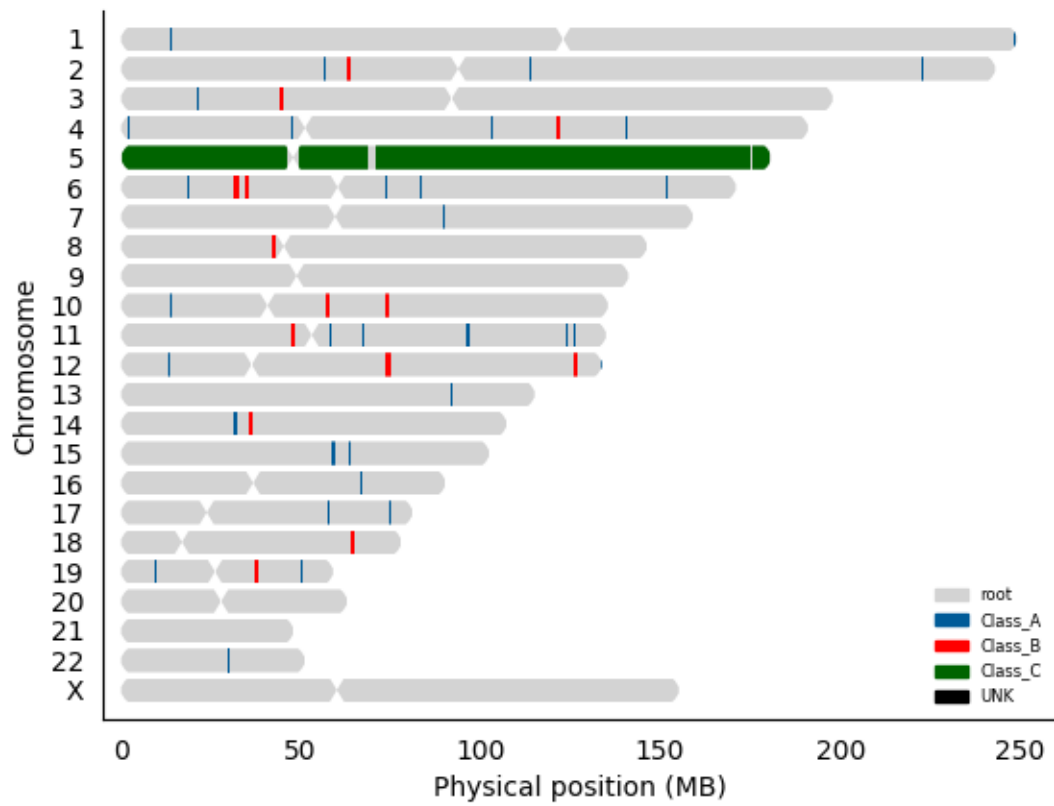



### Putative UPD15

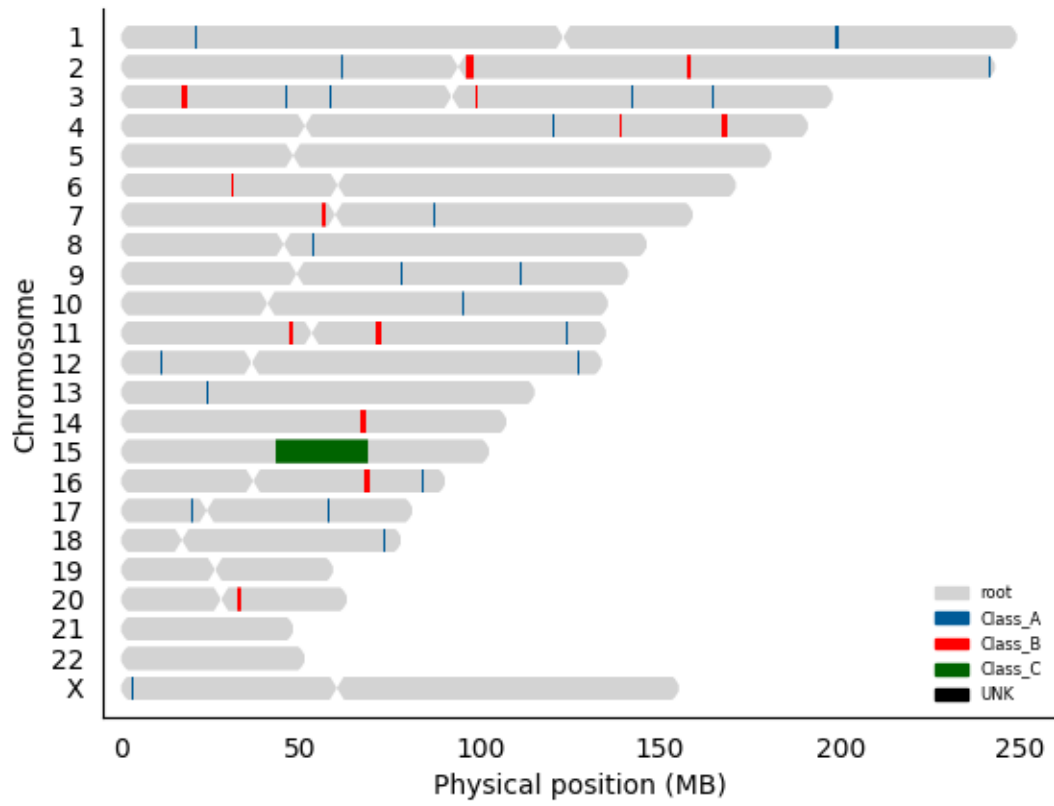

### Putative UPD22

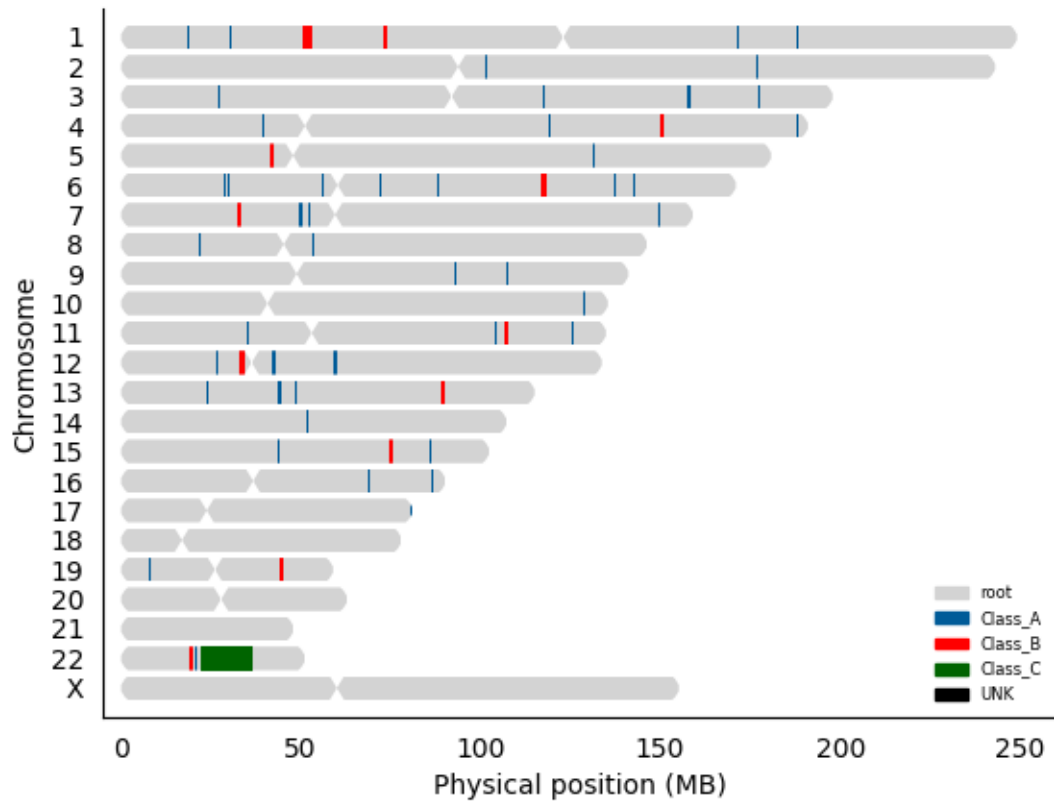

### Putative UPD15

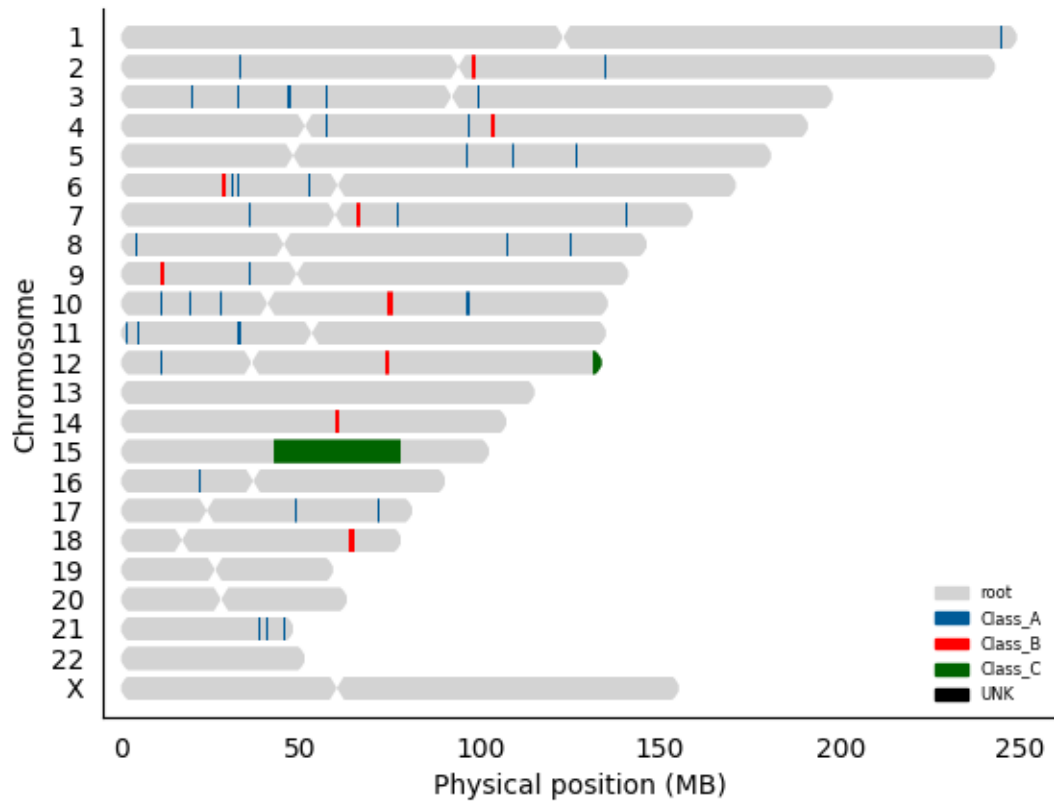

### Putative UPD5

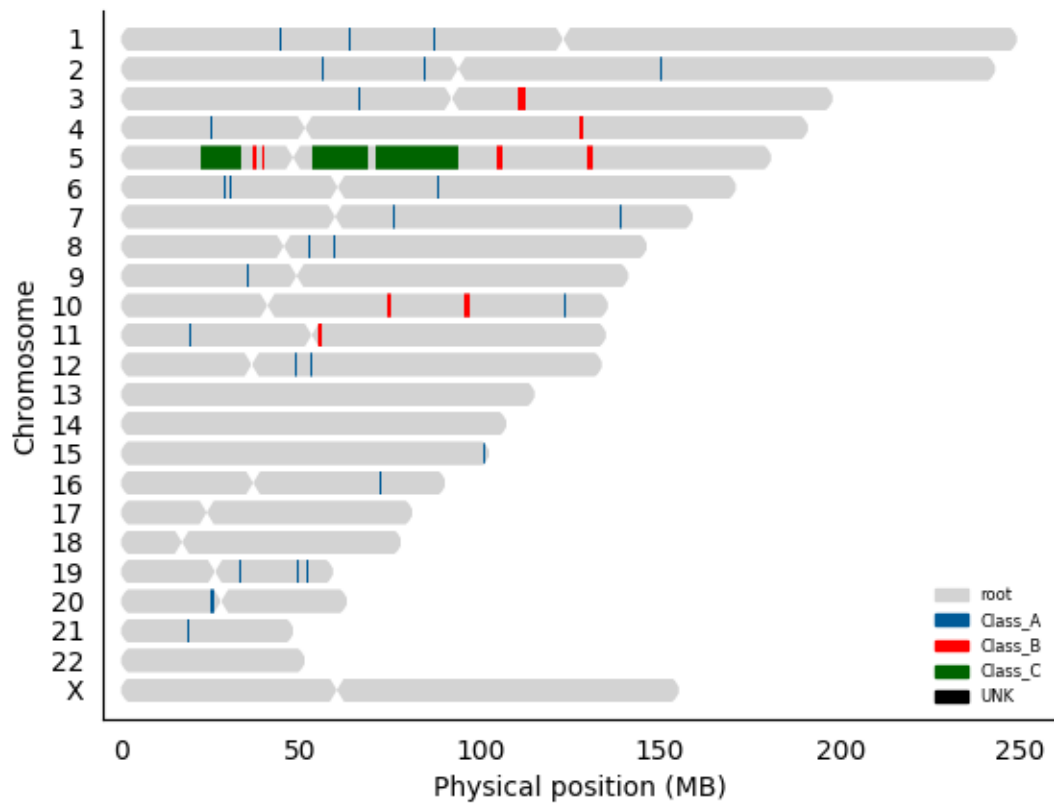

### Putative UPD15

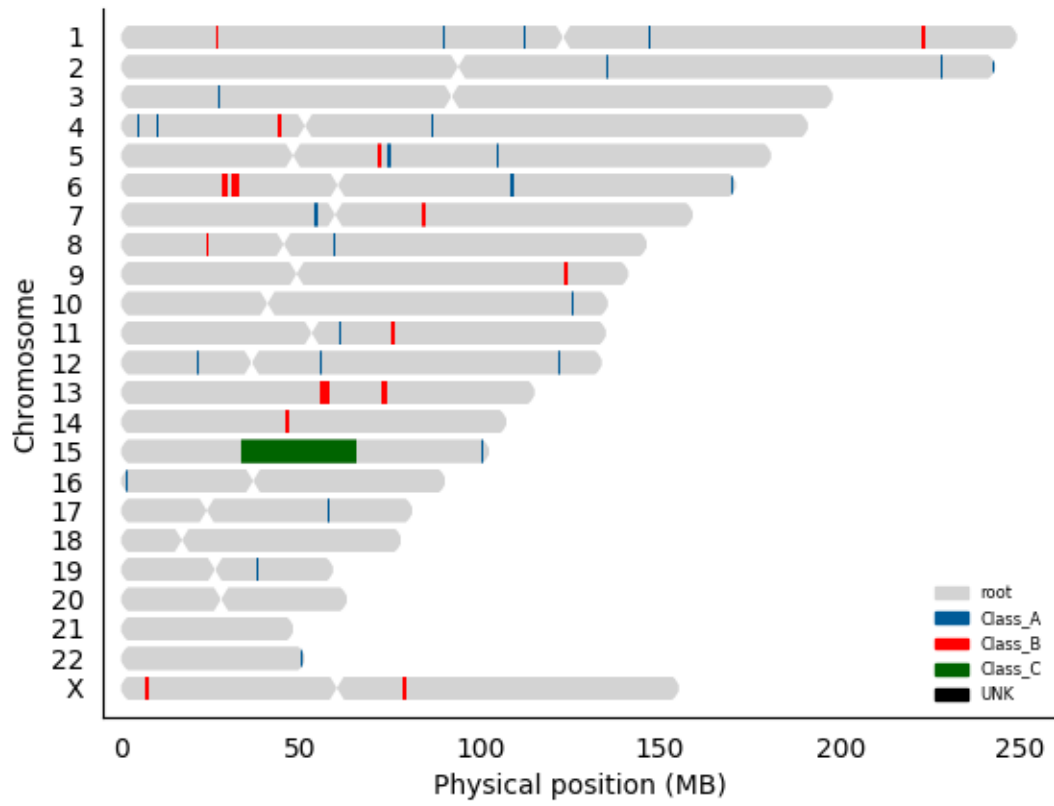

### Putative UPD22

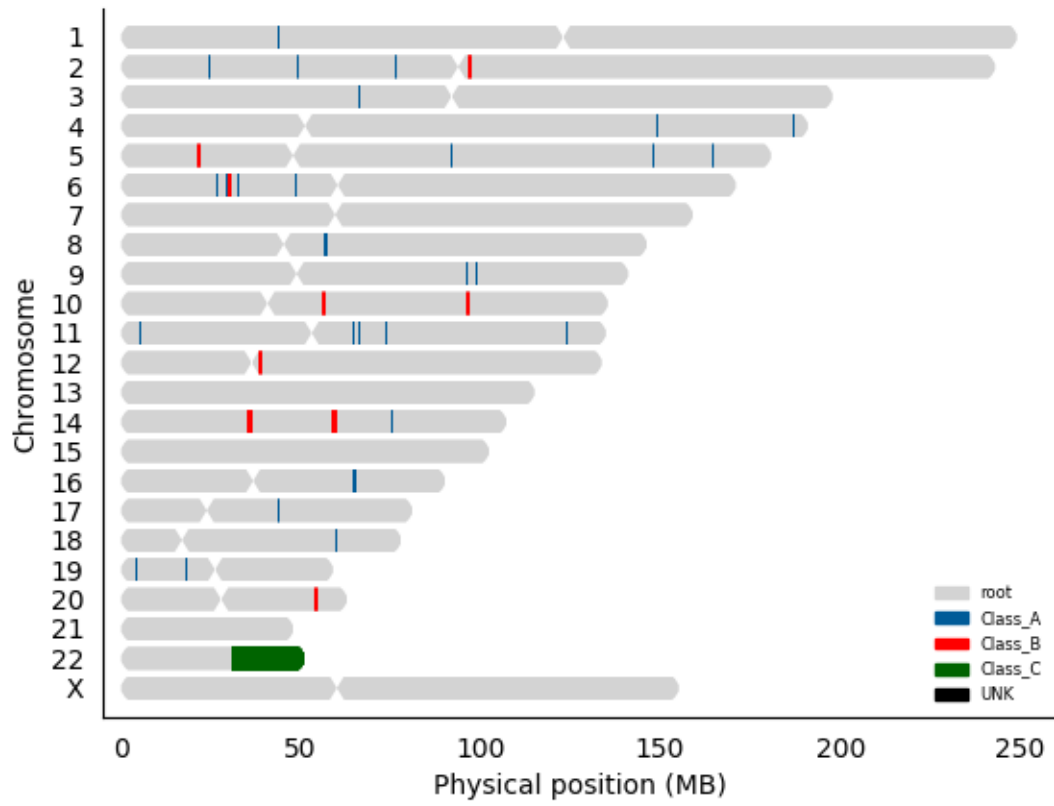

### Putative UPD5

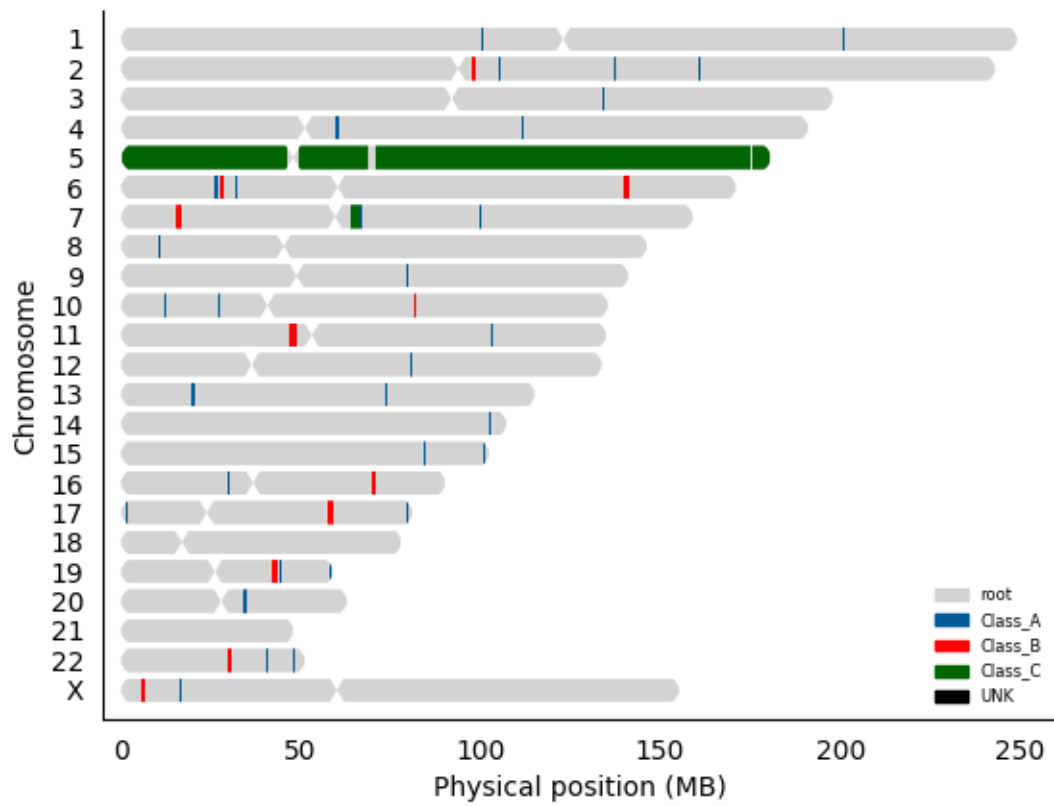

### Putative UPD22

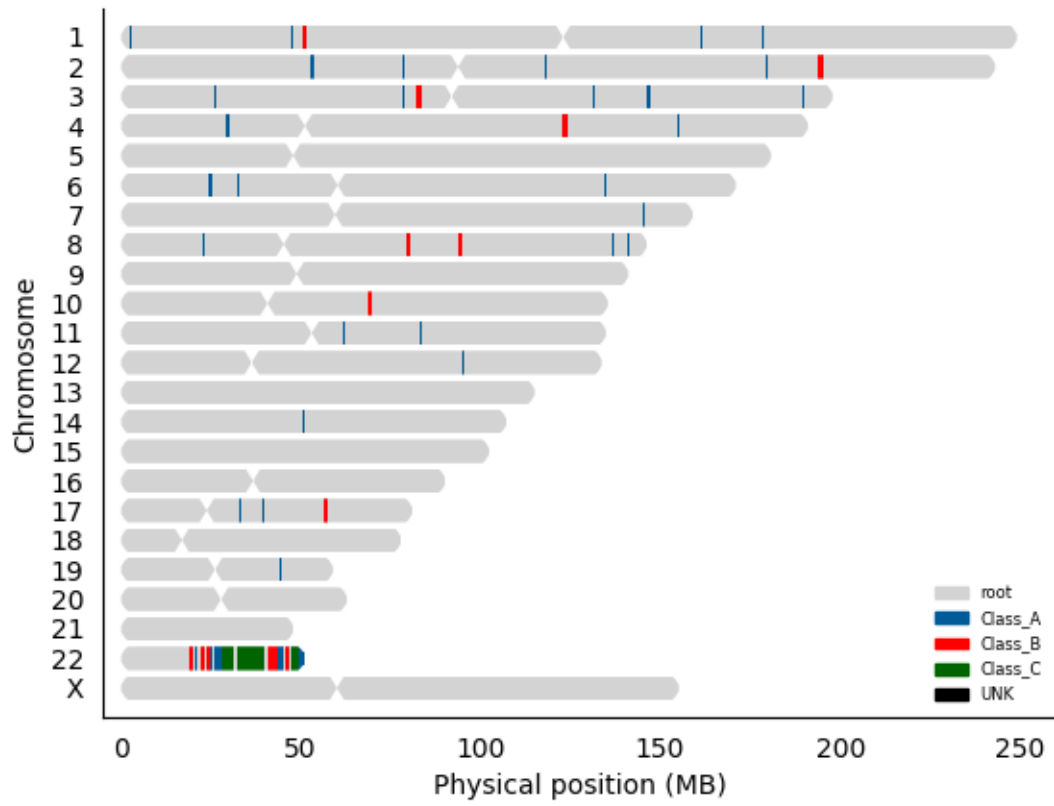



### Putative UPD1

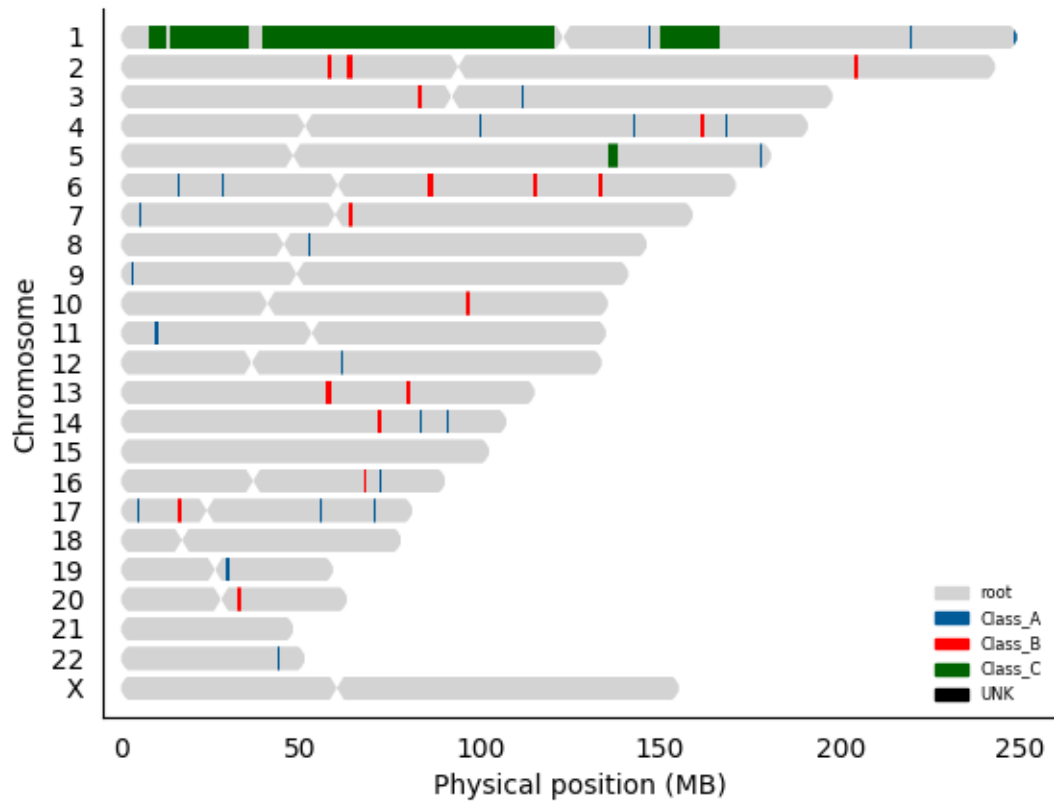

### Putative UPD4

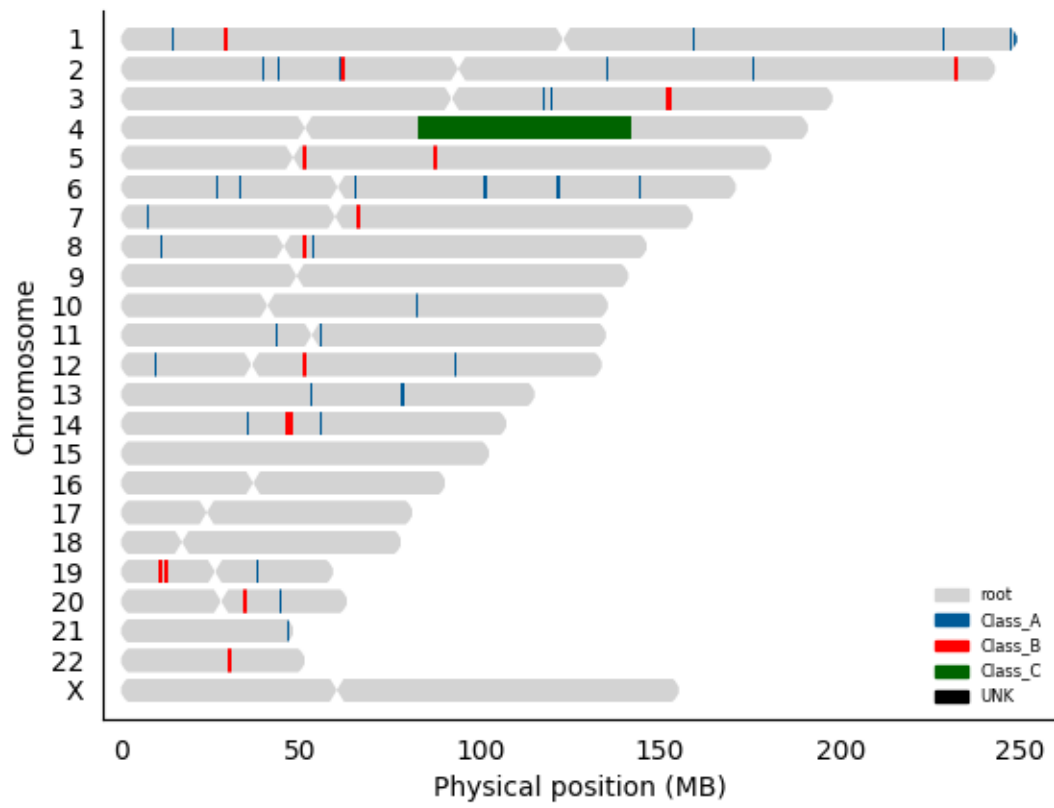

### Putative UPD2

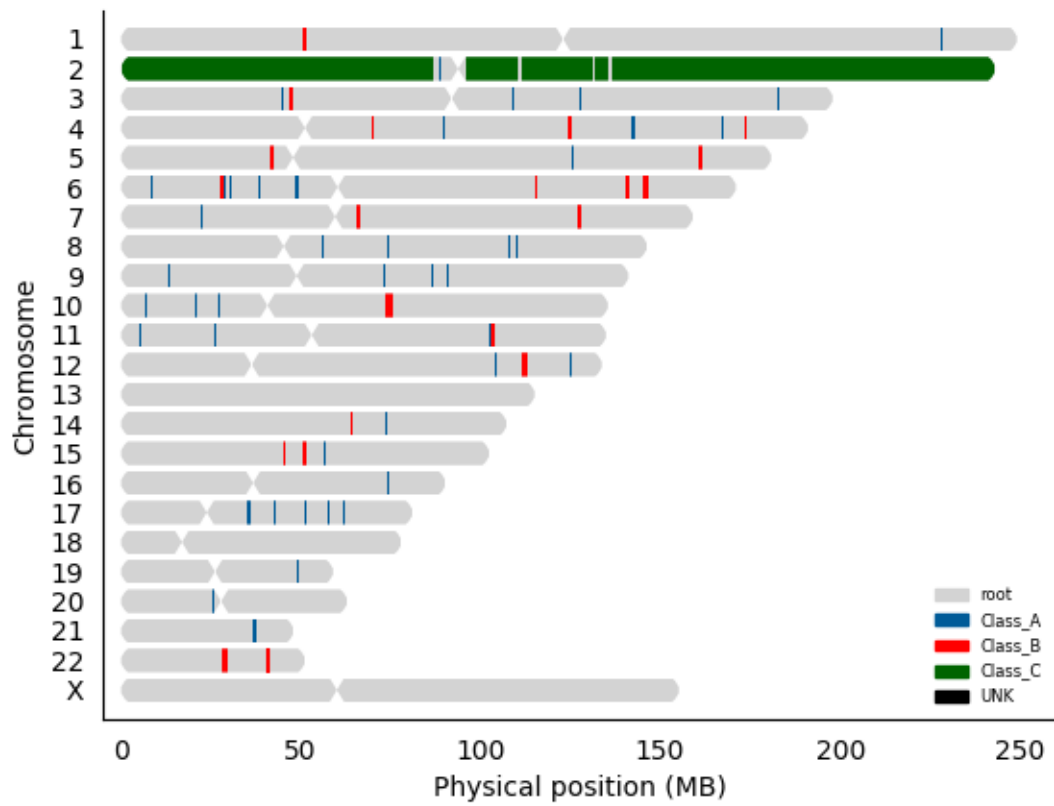

### Putative UPD15

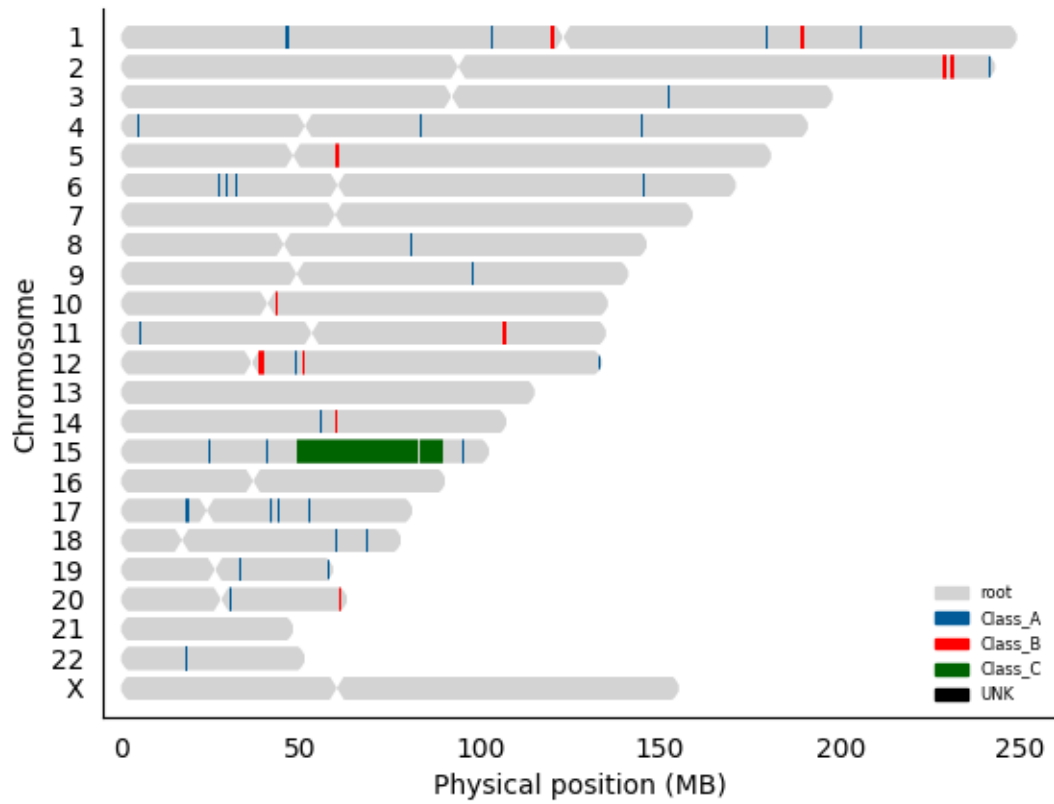

### Putative UPD4

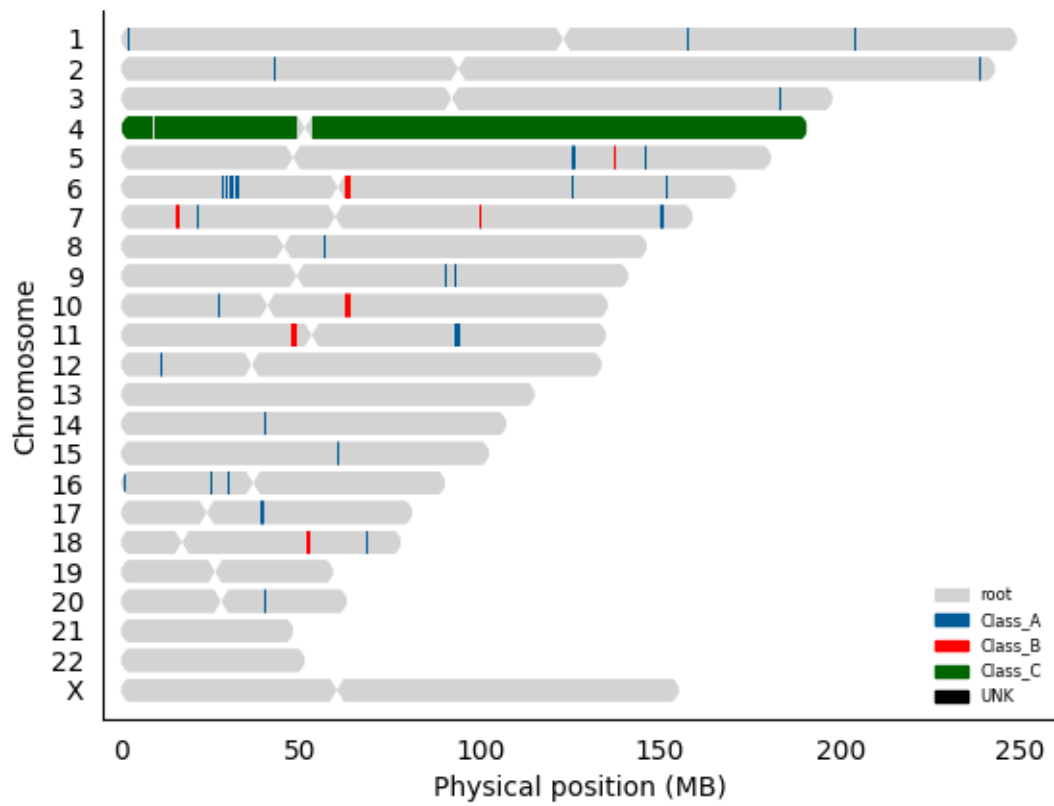

### Putative UPD22

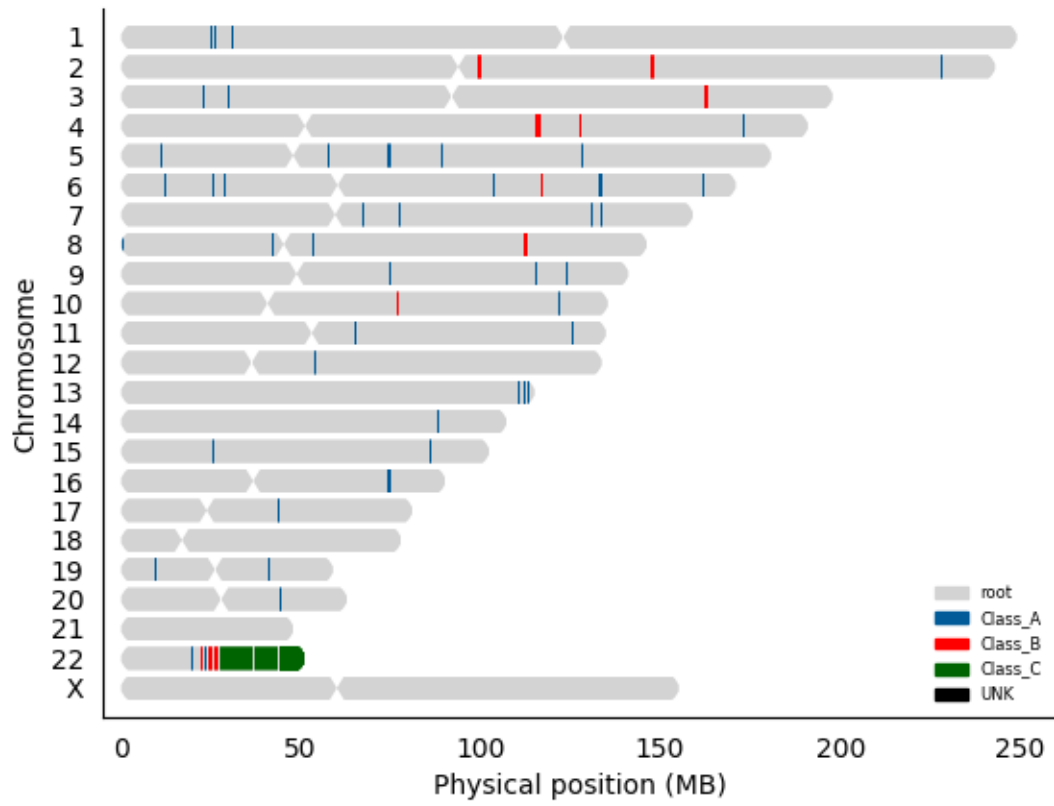

### Putative UPD1

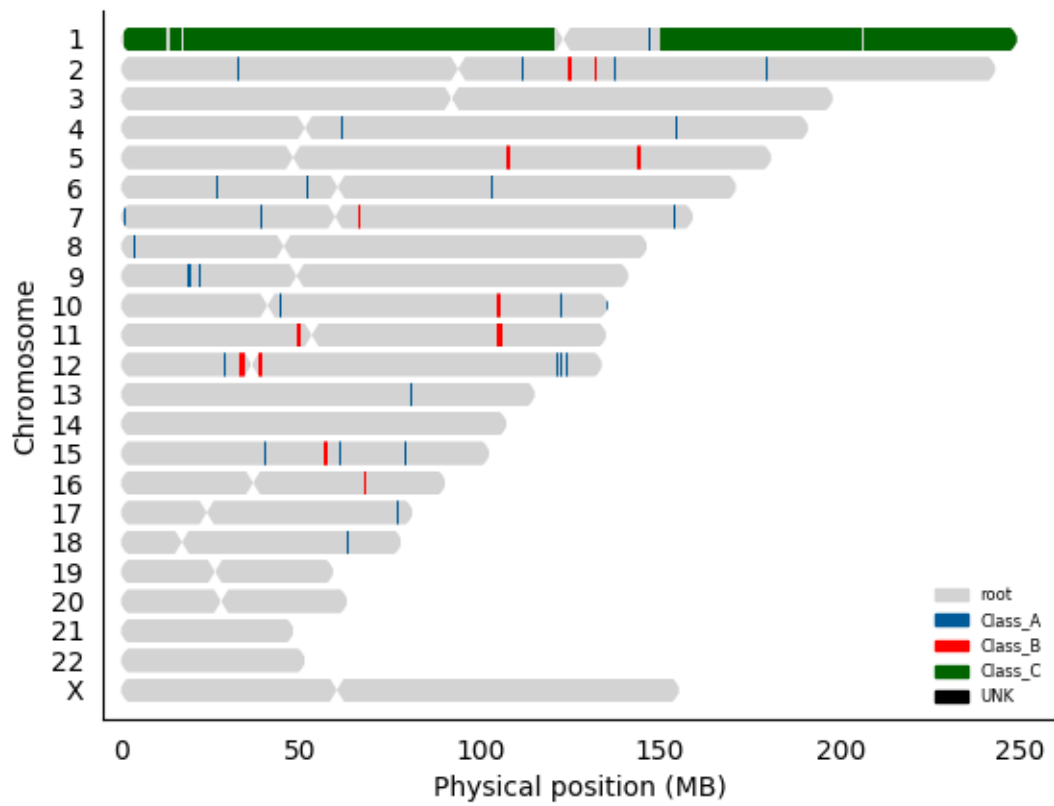

### Putative UPD4

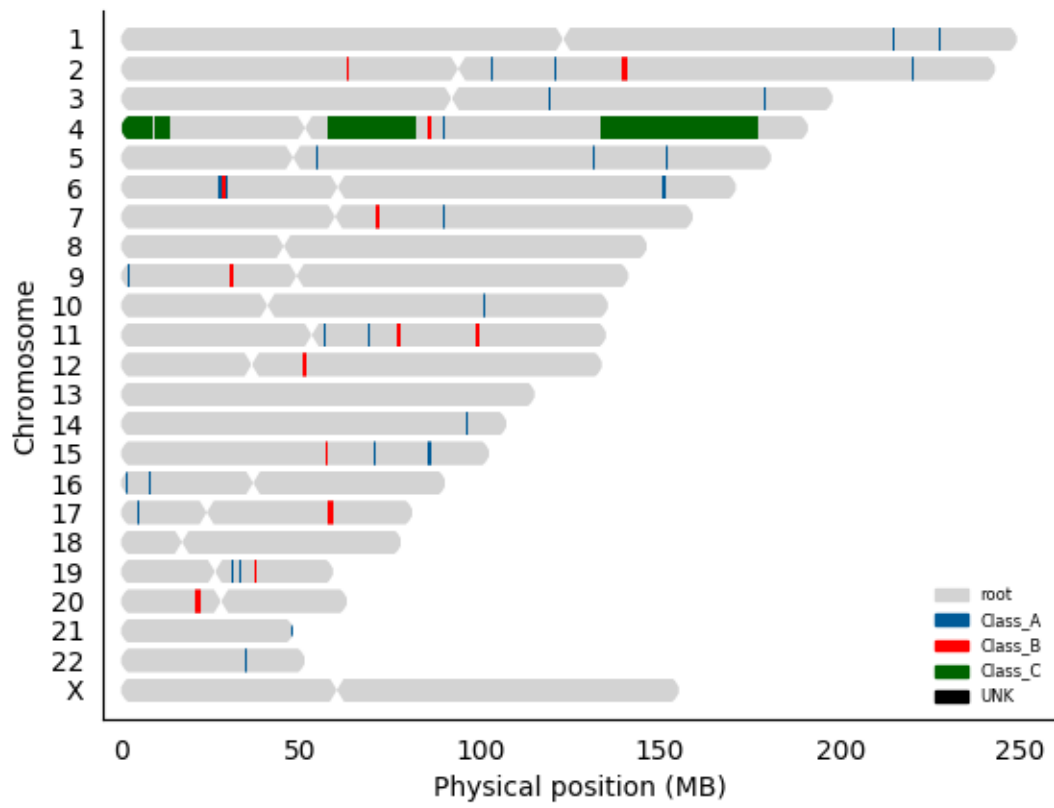



### Putative UPD22

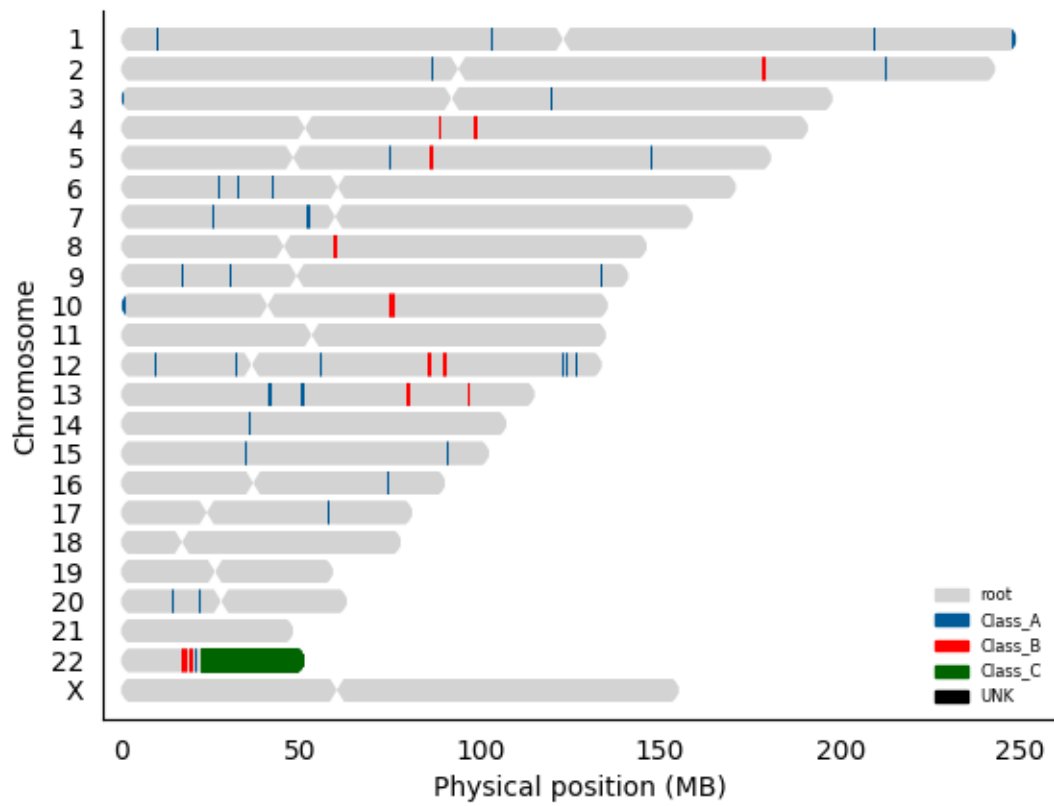

### Putative UPD1

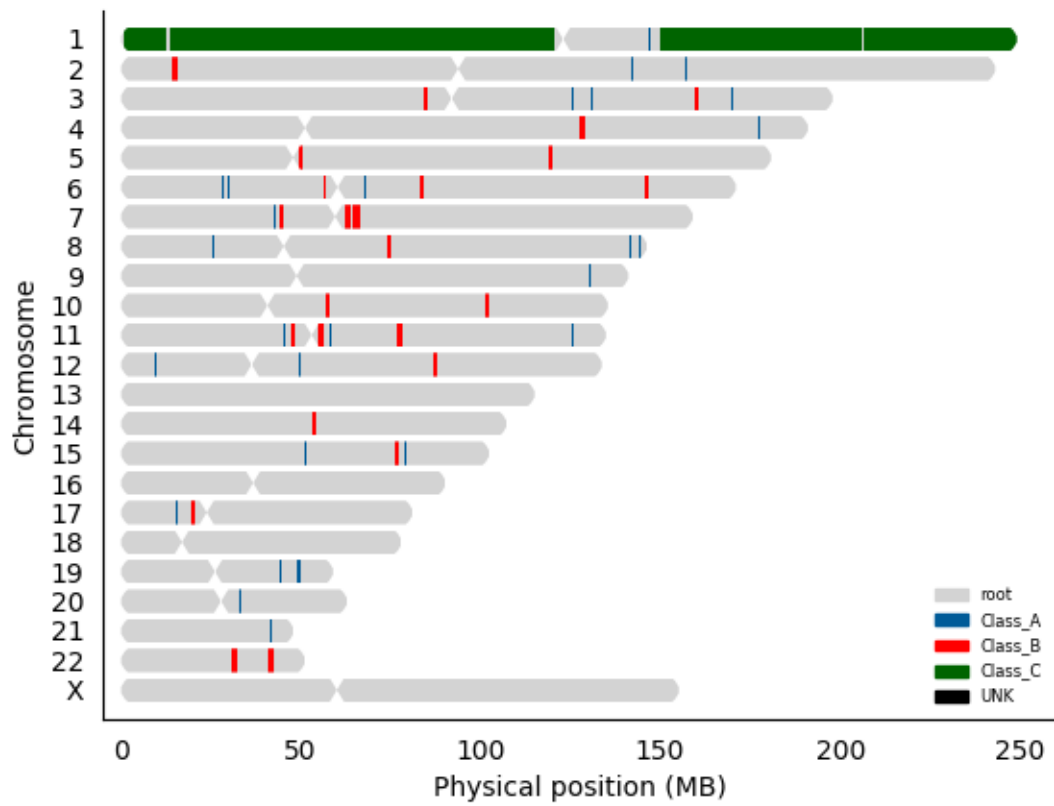

### Putative UPD4

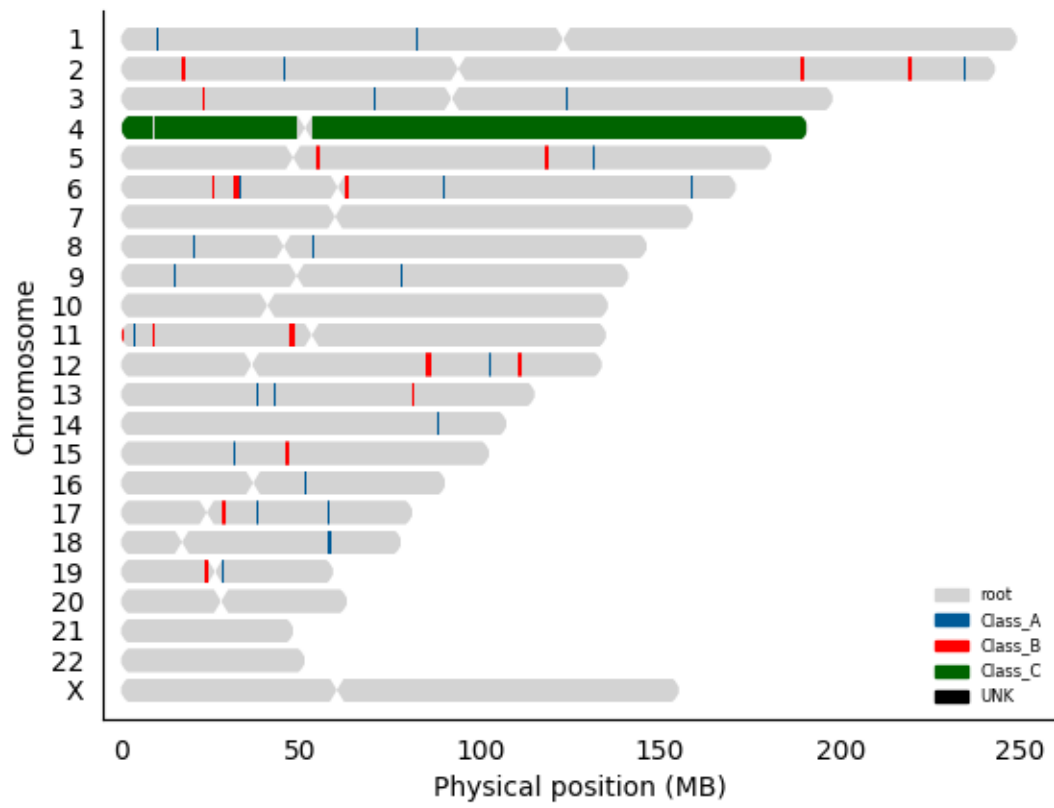

### Putative UPD2

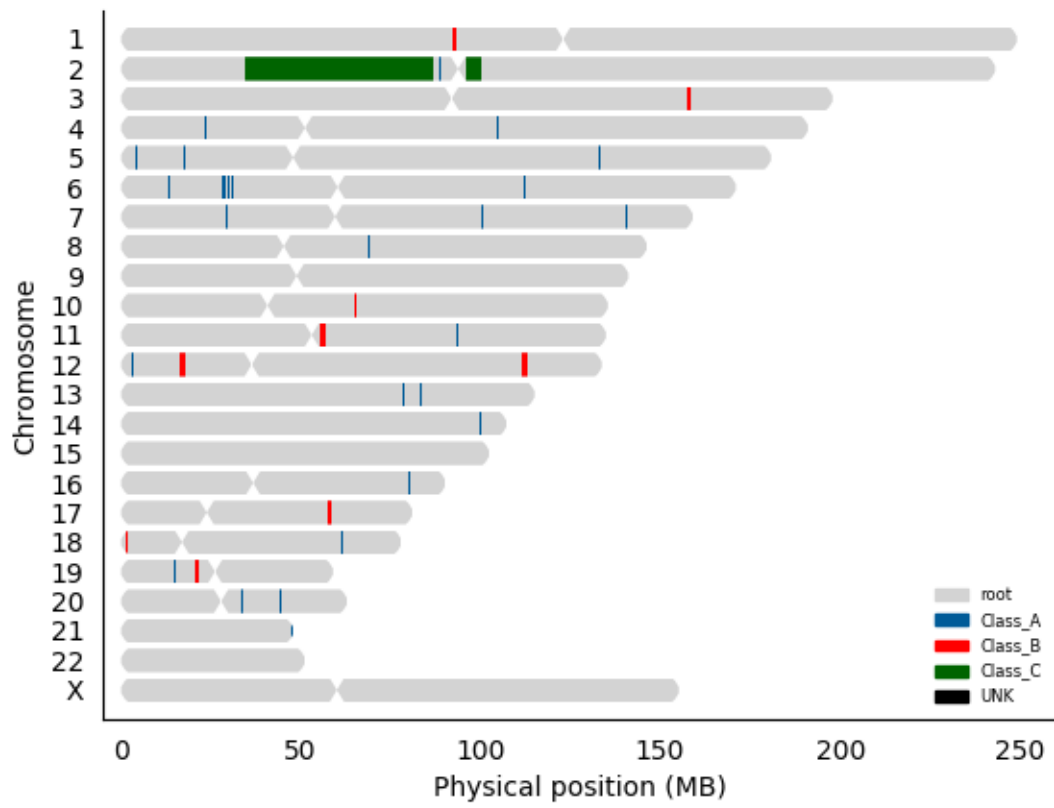

### Putative UPD14

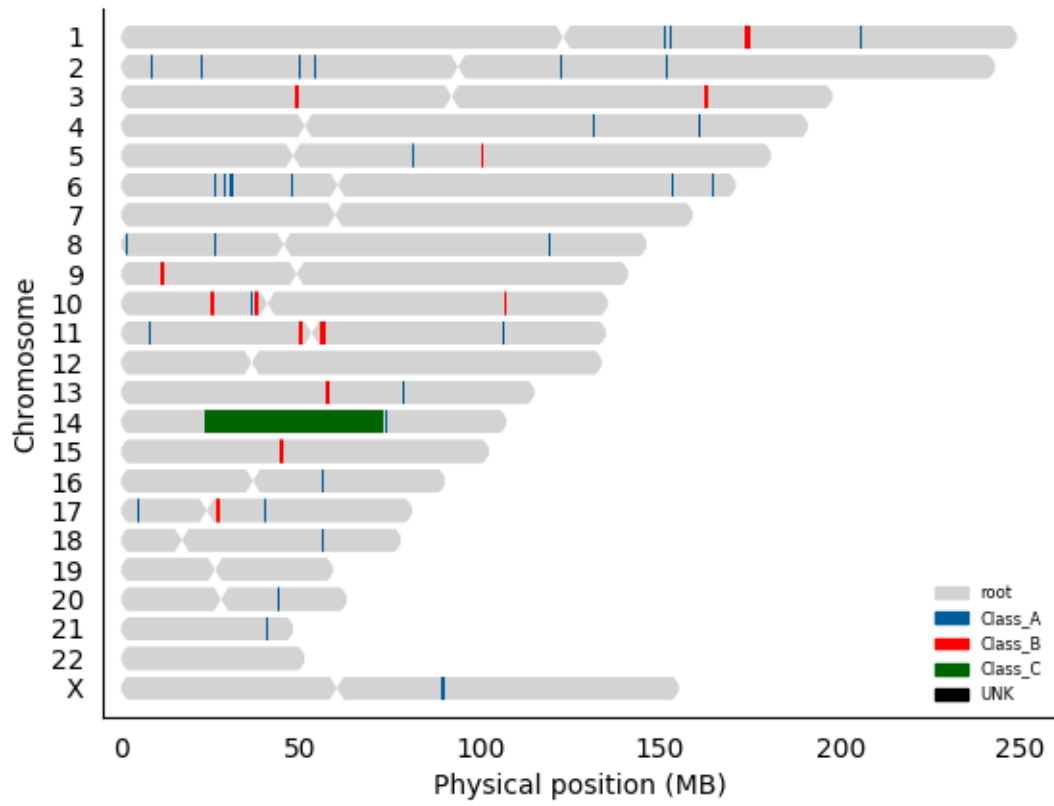

### Putative UPD2

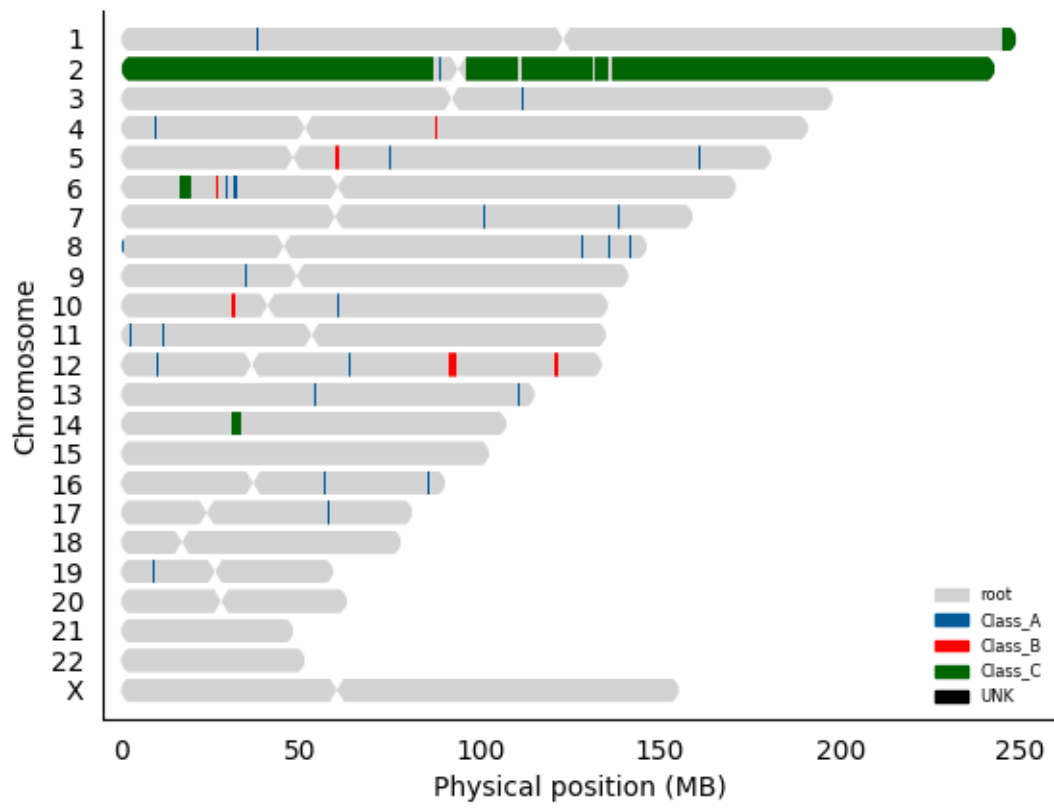

### Putative UPD4

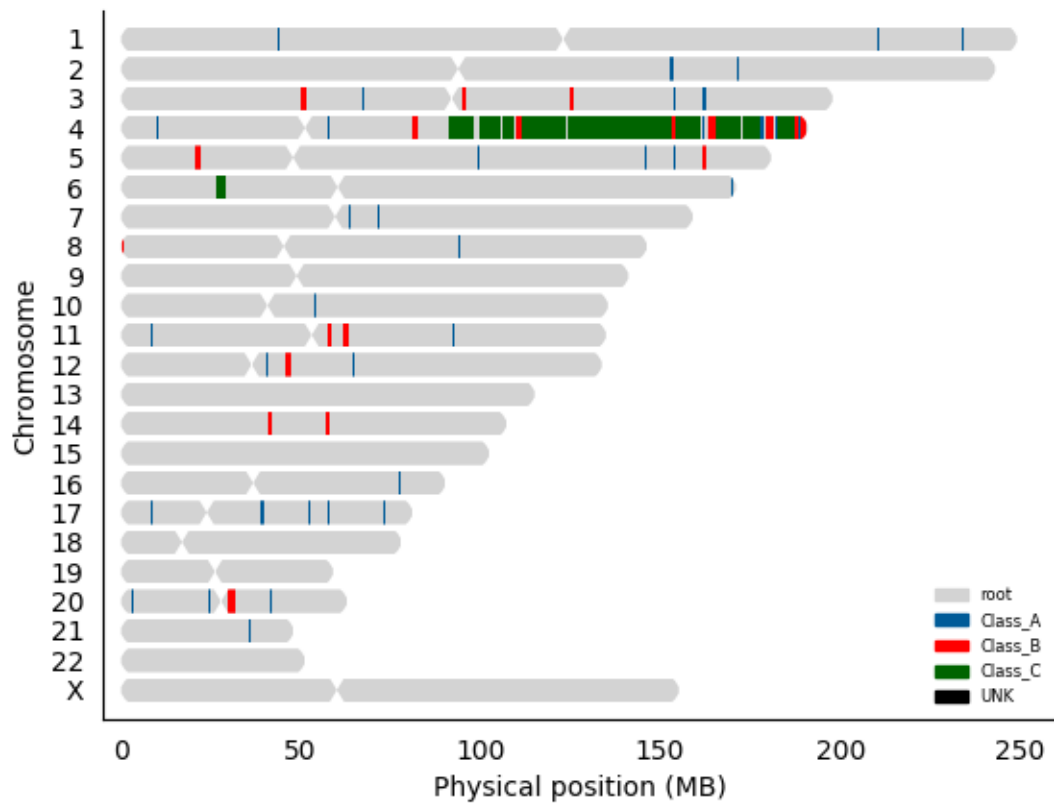

### Putative UPD14

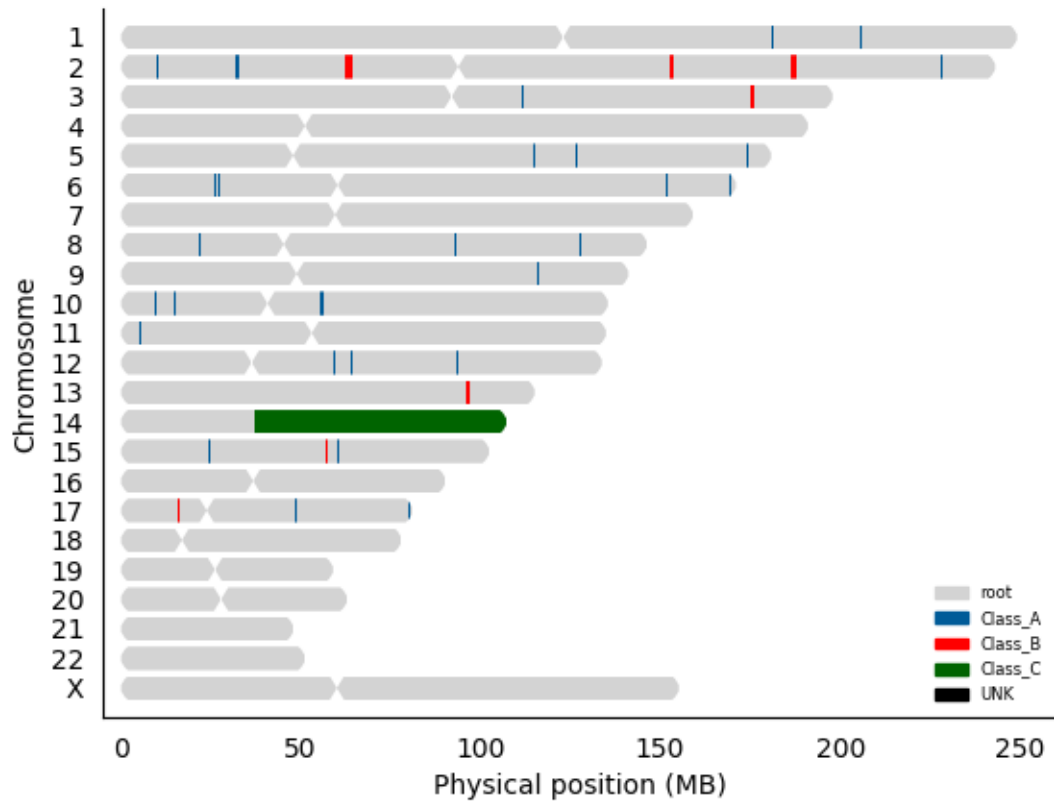



### Putative UPD4

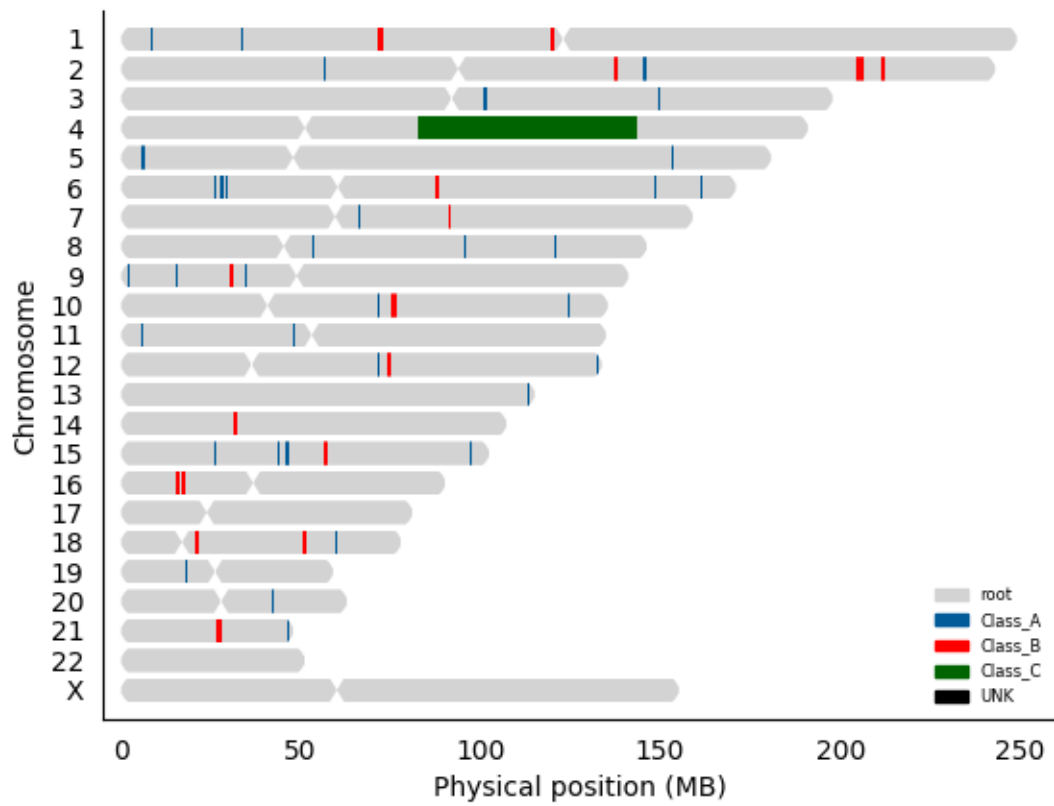

### Putative UPD1

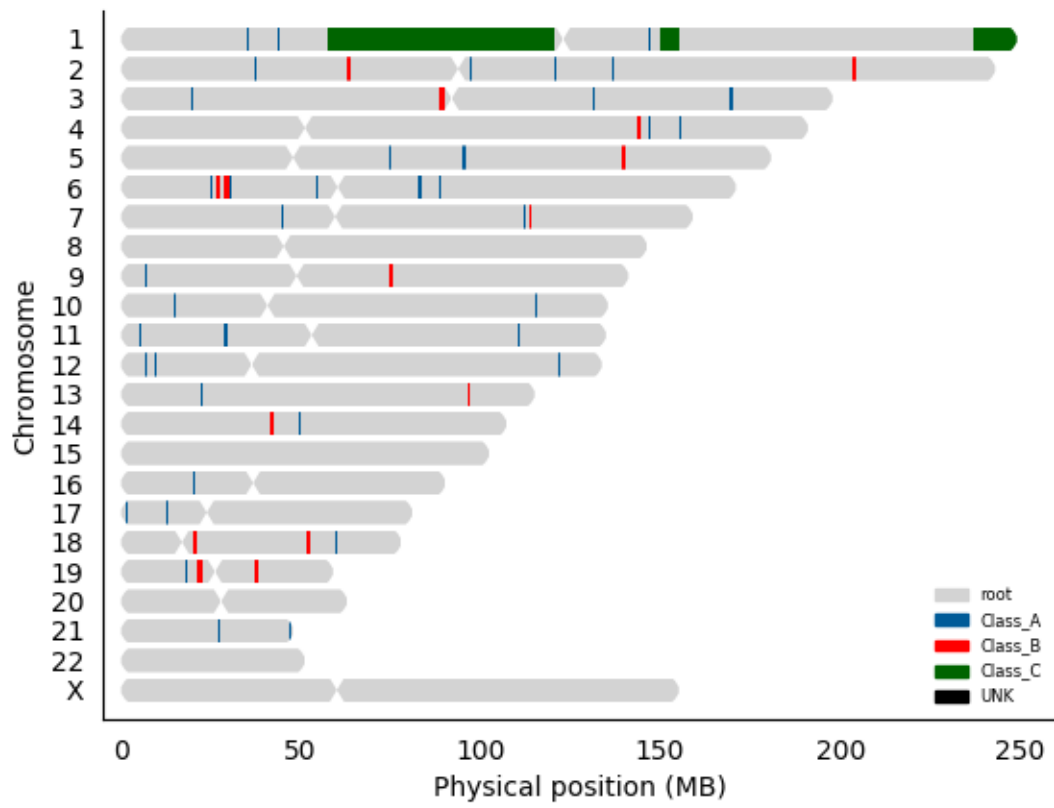

### Putative UPD2

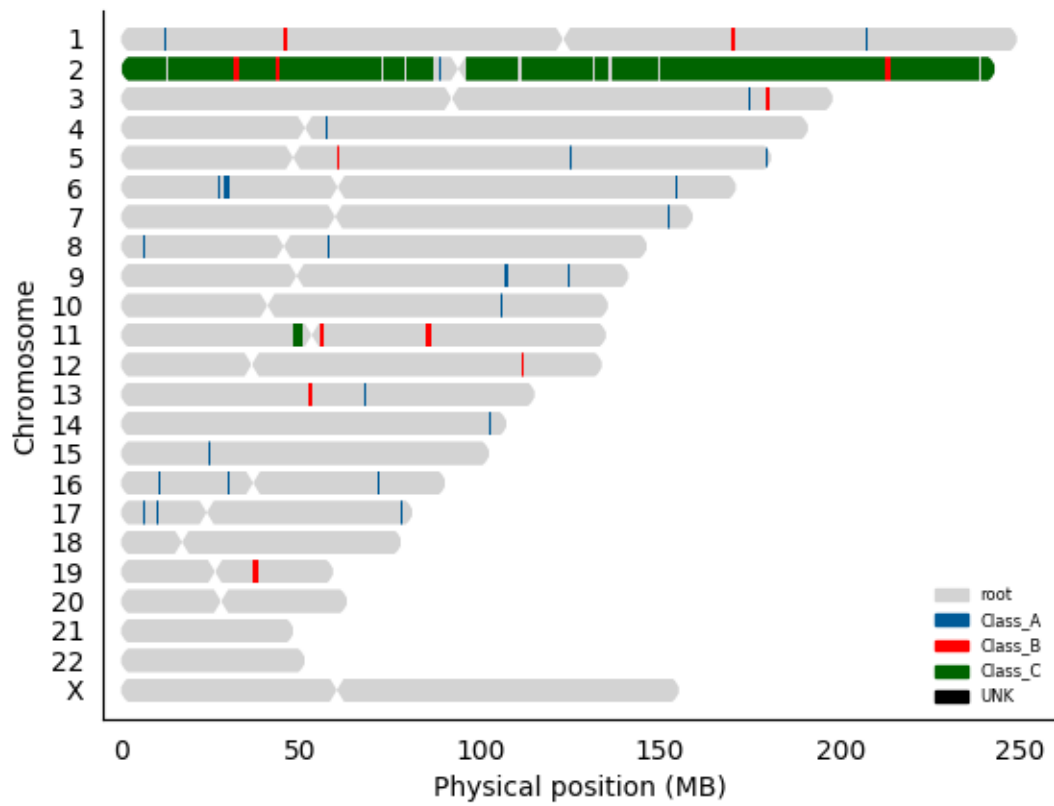

### Putative UPD4

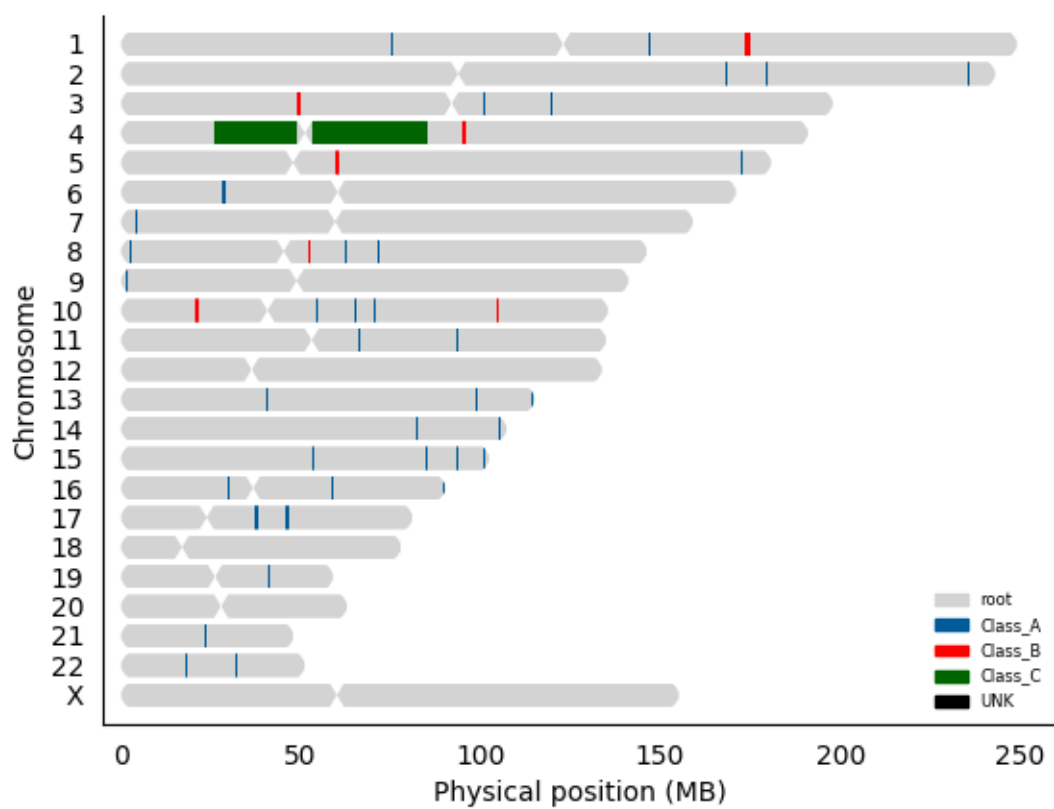

### Putative UPD2

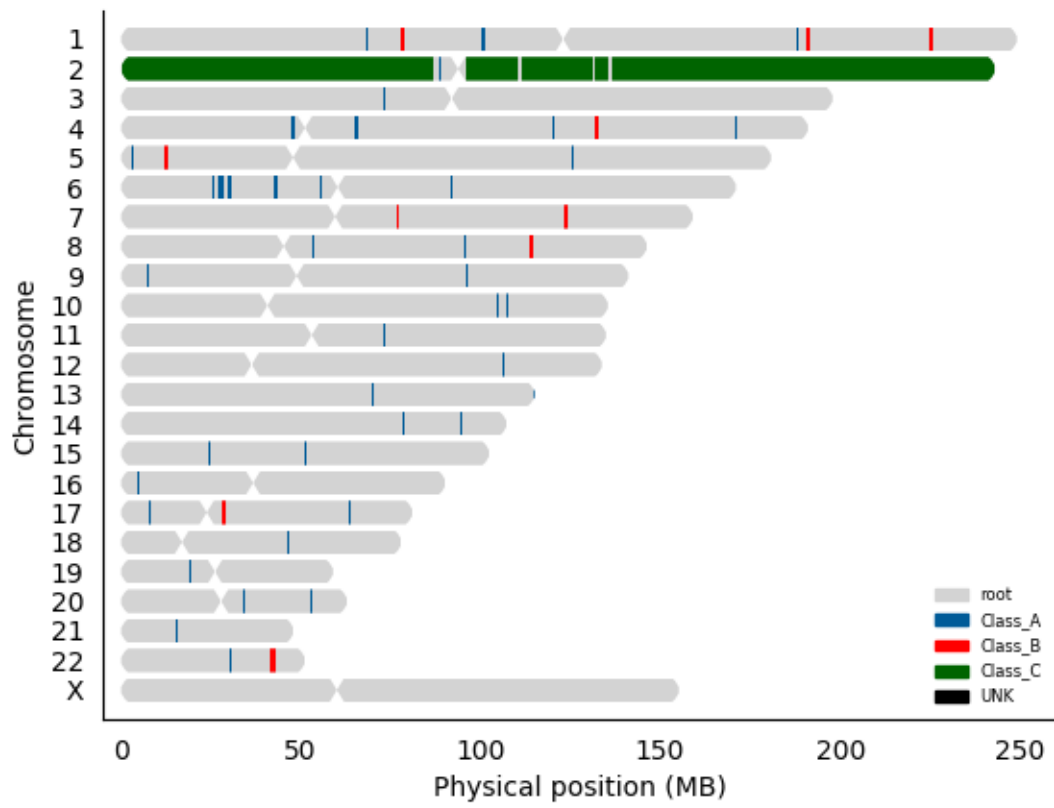

### Putative UPD1

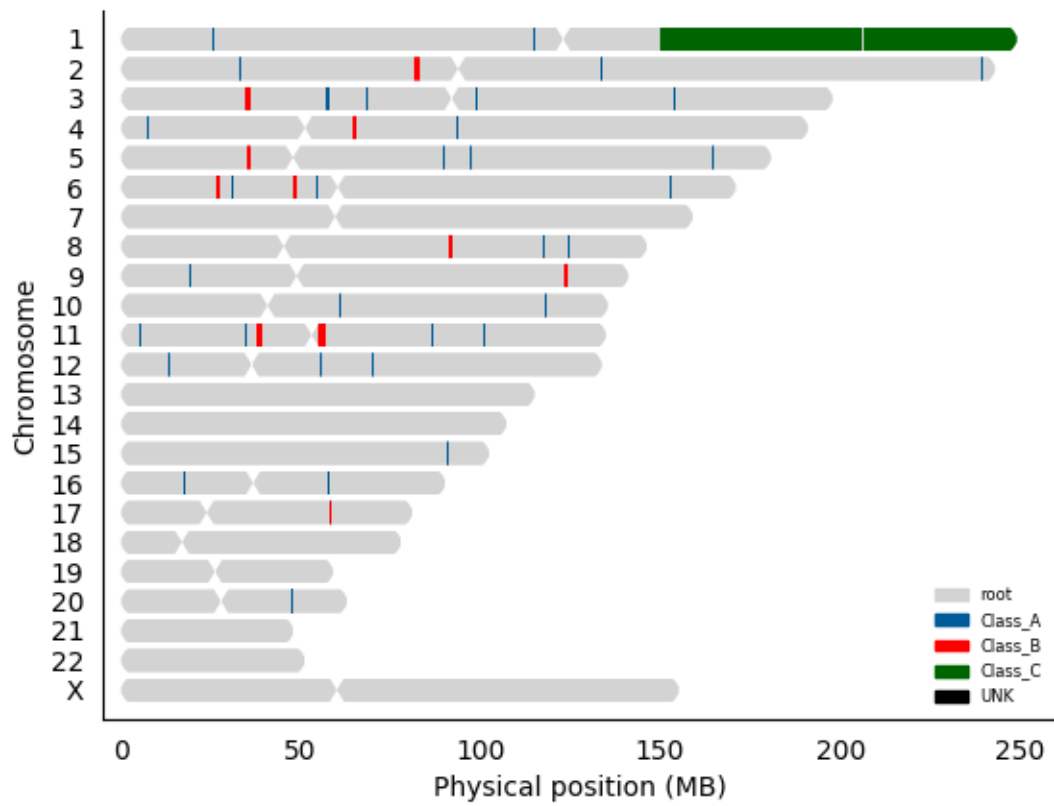

### Putative UPD4

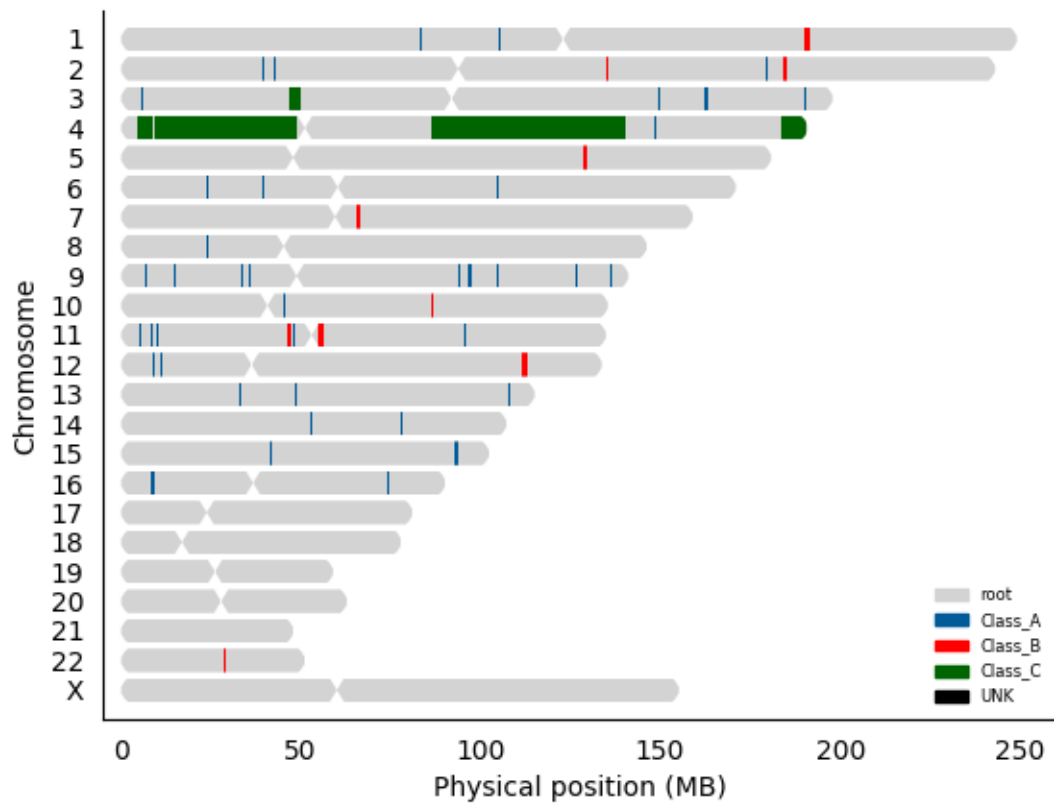

### Putative UPD21

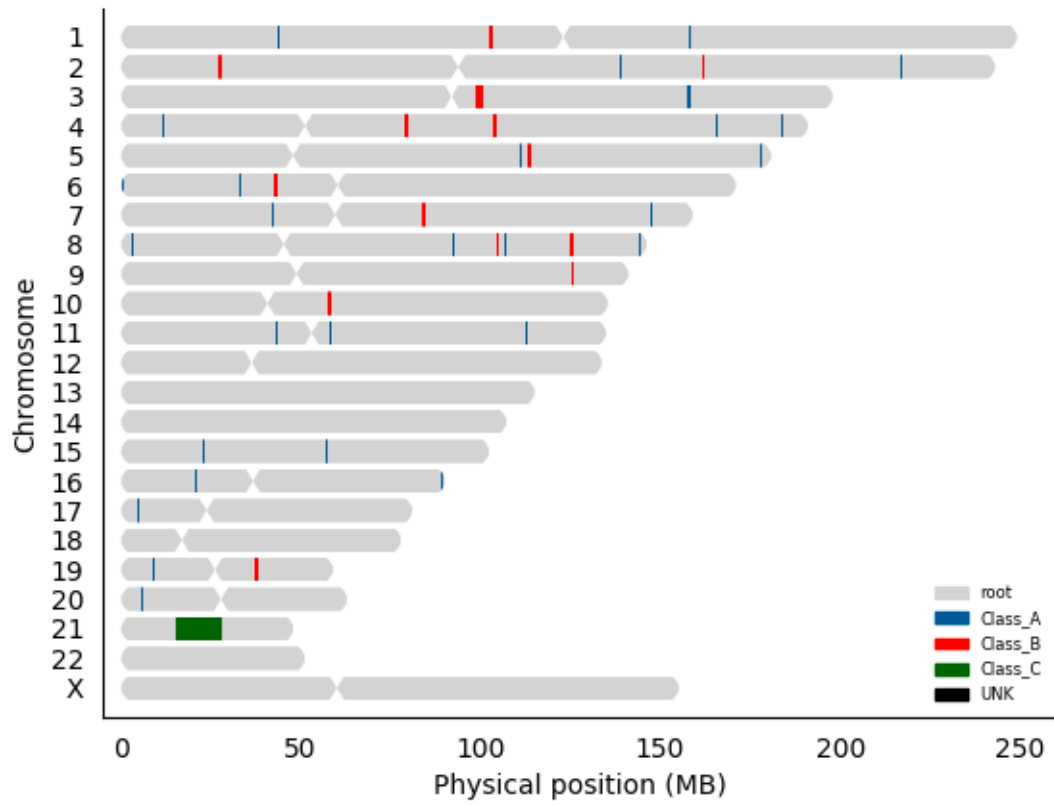



### Putative UPD13

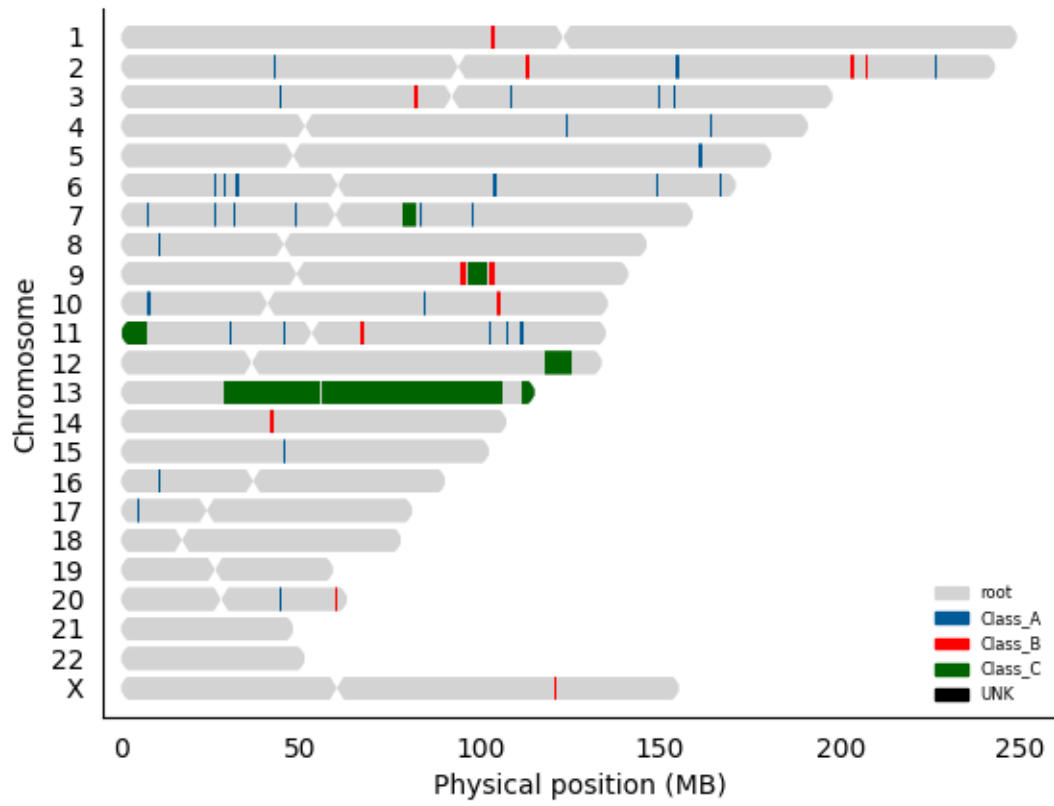

### Putative UPD4

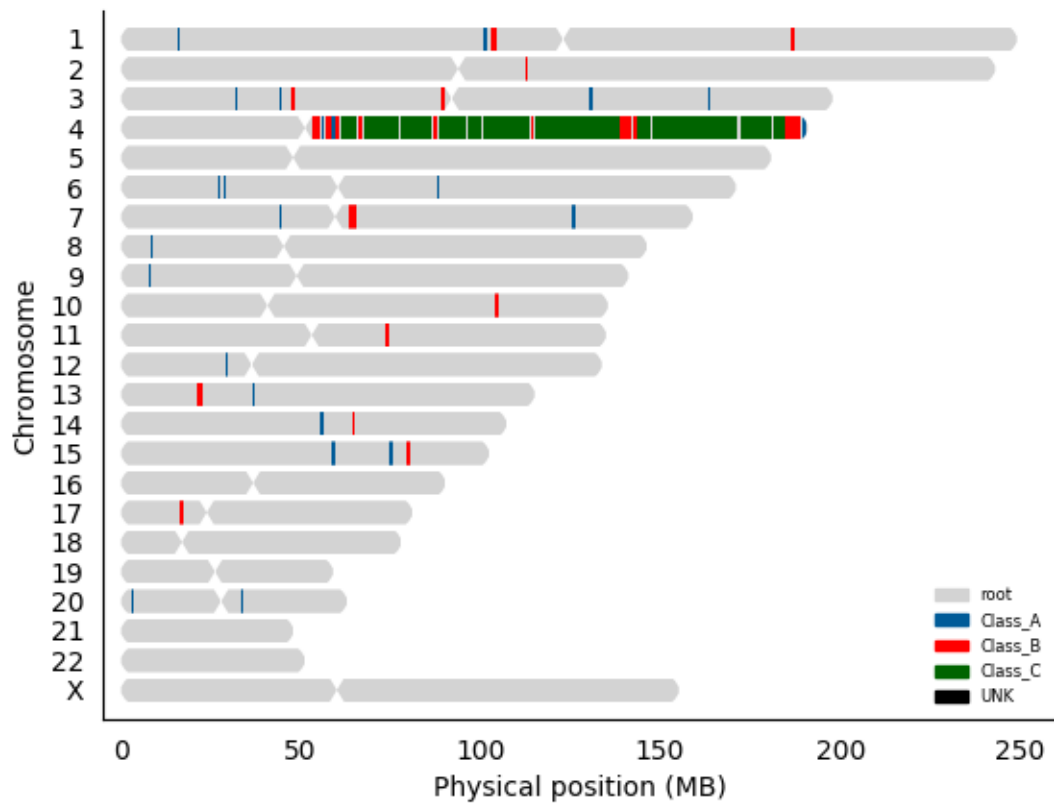

### Putative UPD13

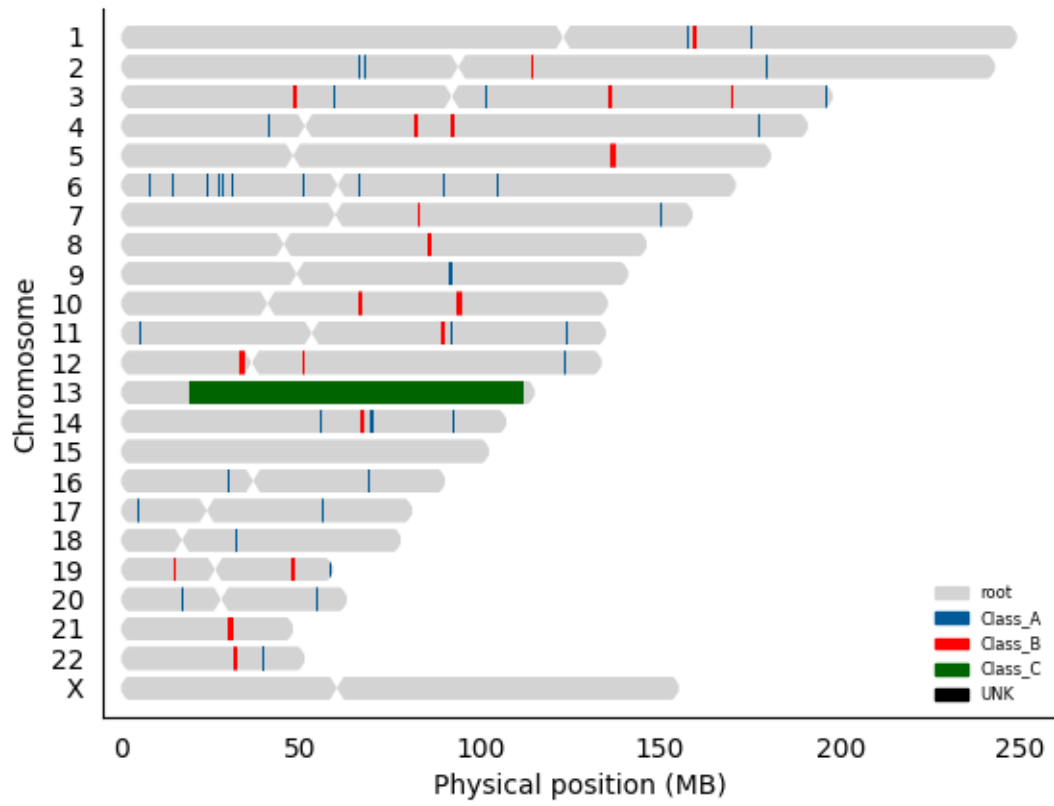

### Putative UPD21

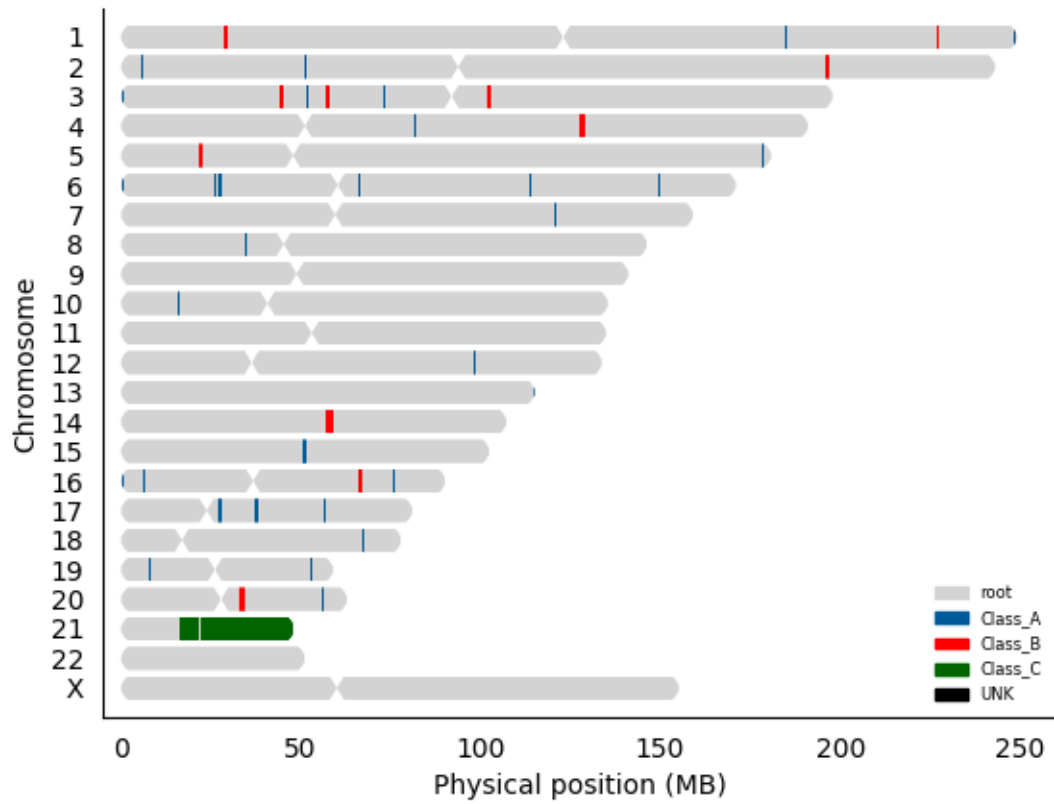

### Putative UPD4

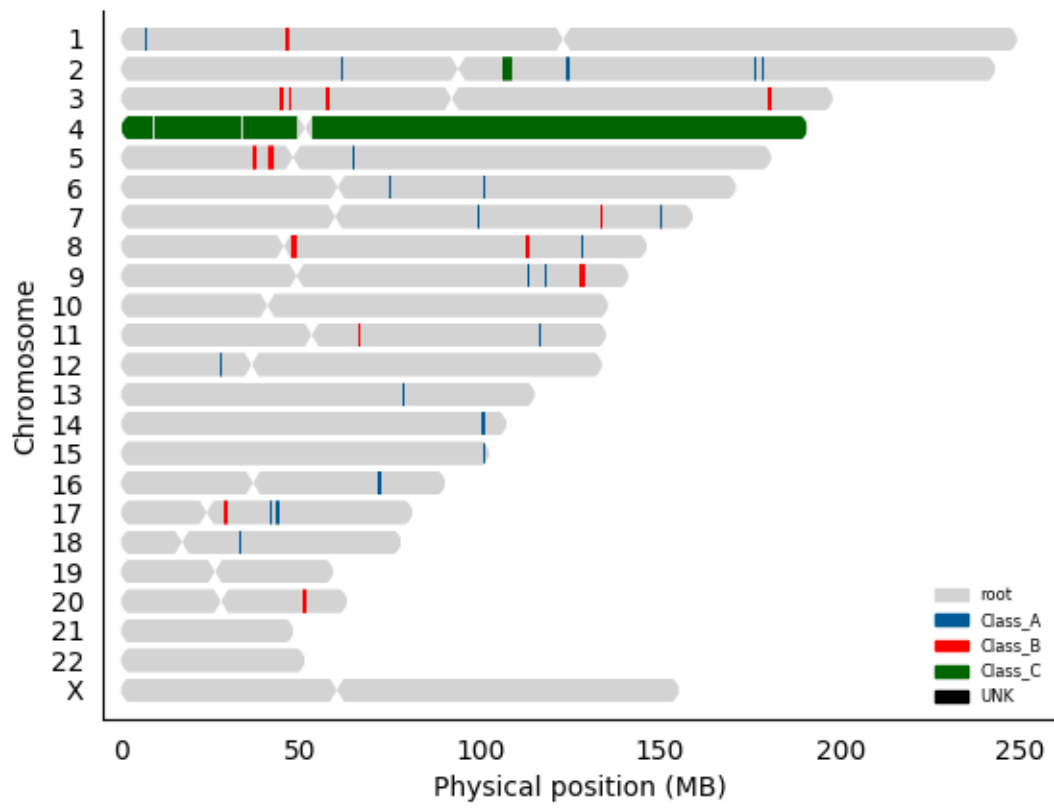

### Putative UPD21

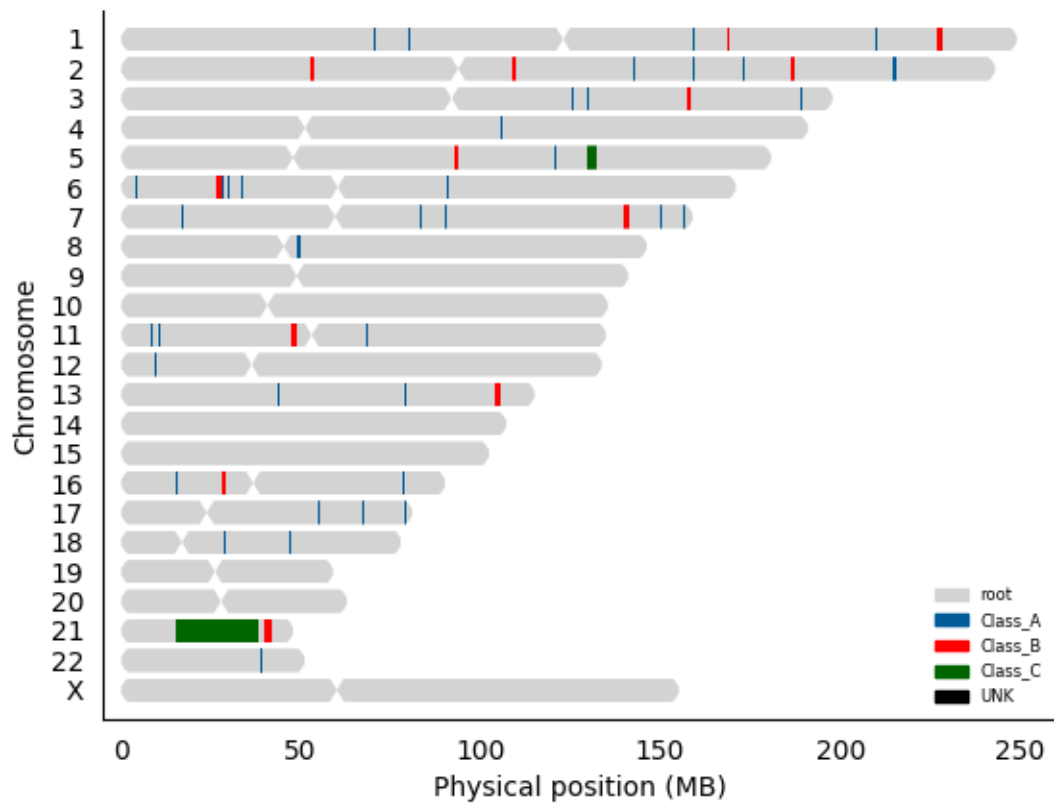

### Putative UPD13

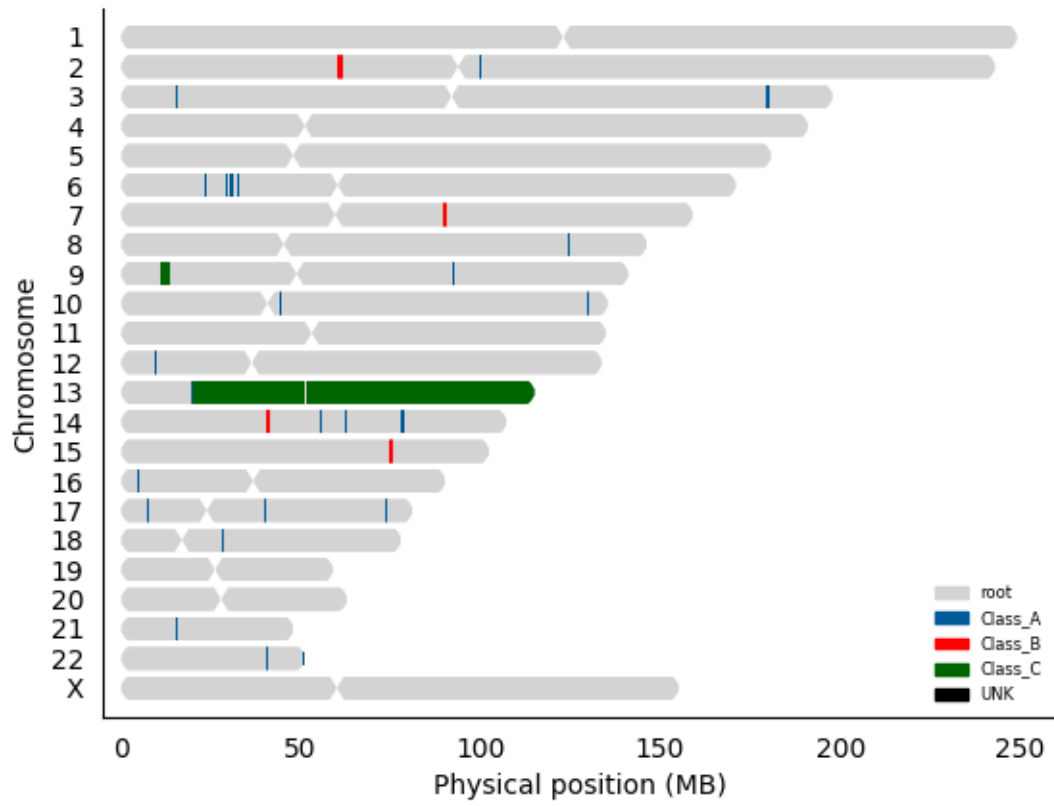

### Putative UPD4

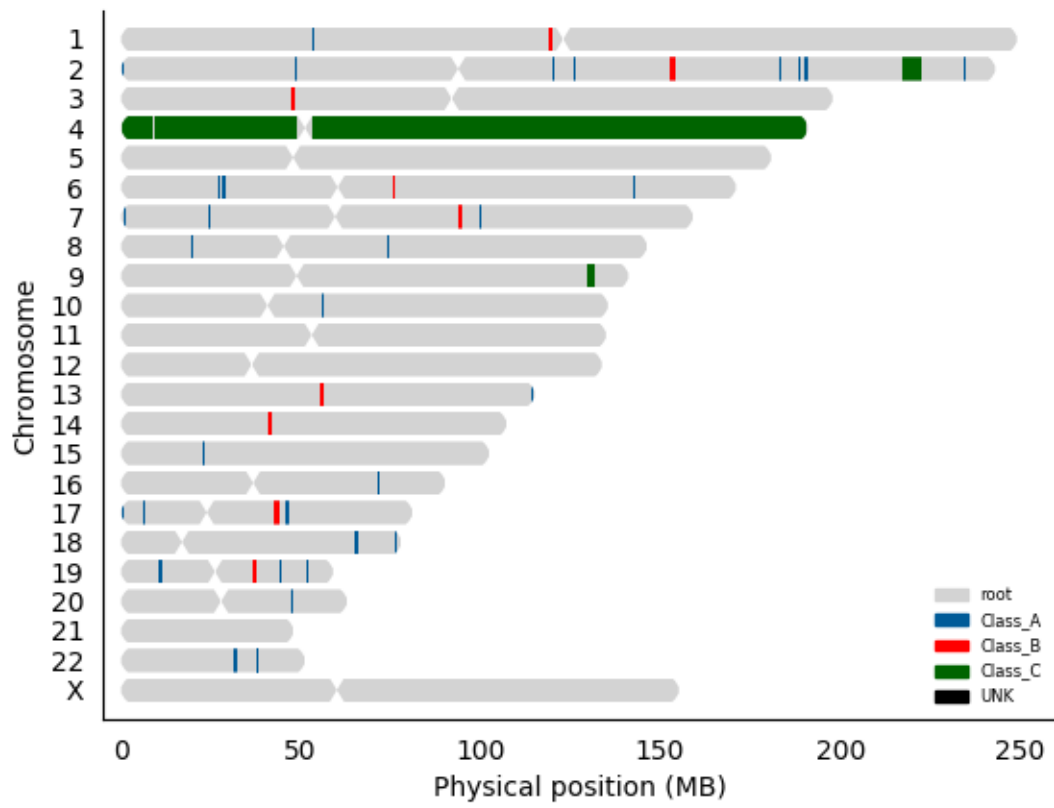



### Putative UPD21

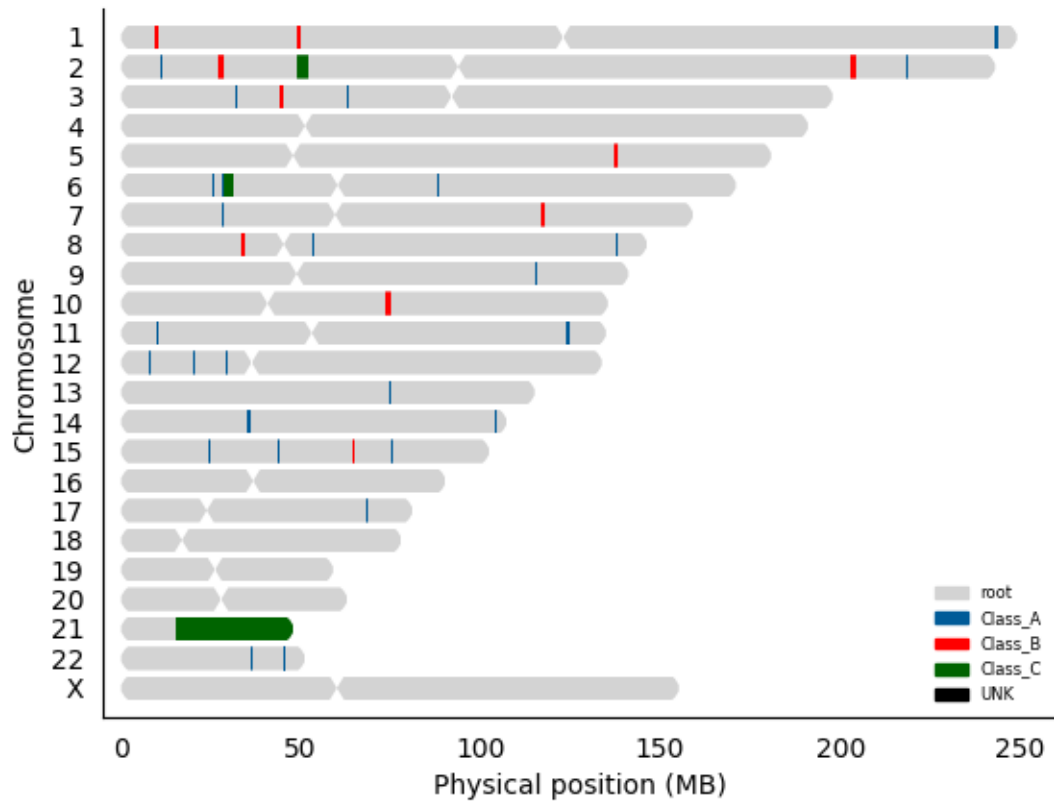

### Putative UPD13

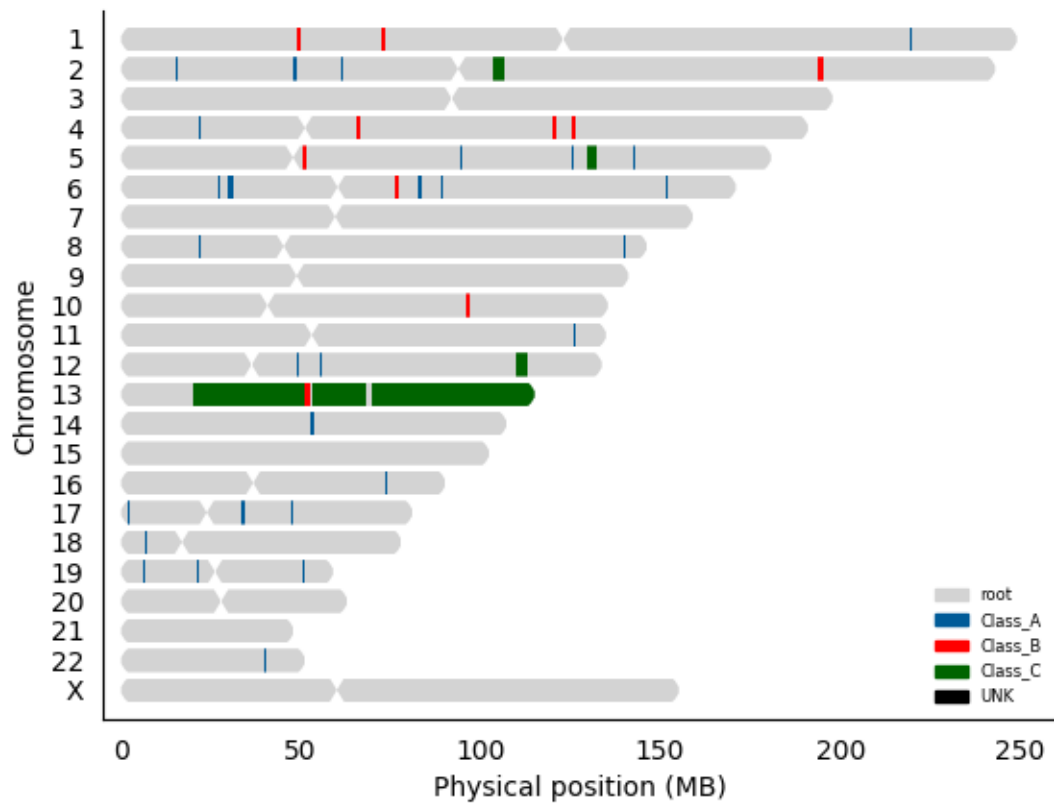

### Putative UPD4

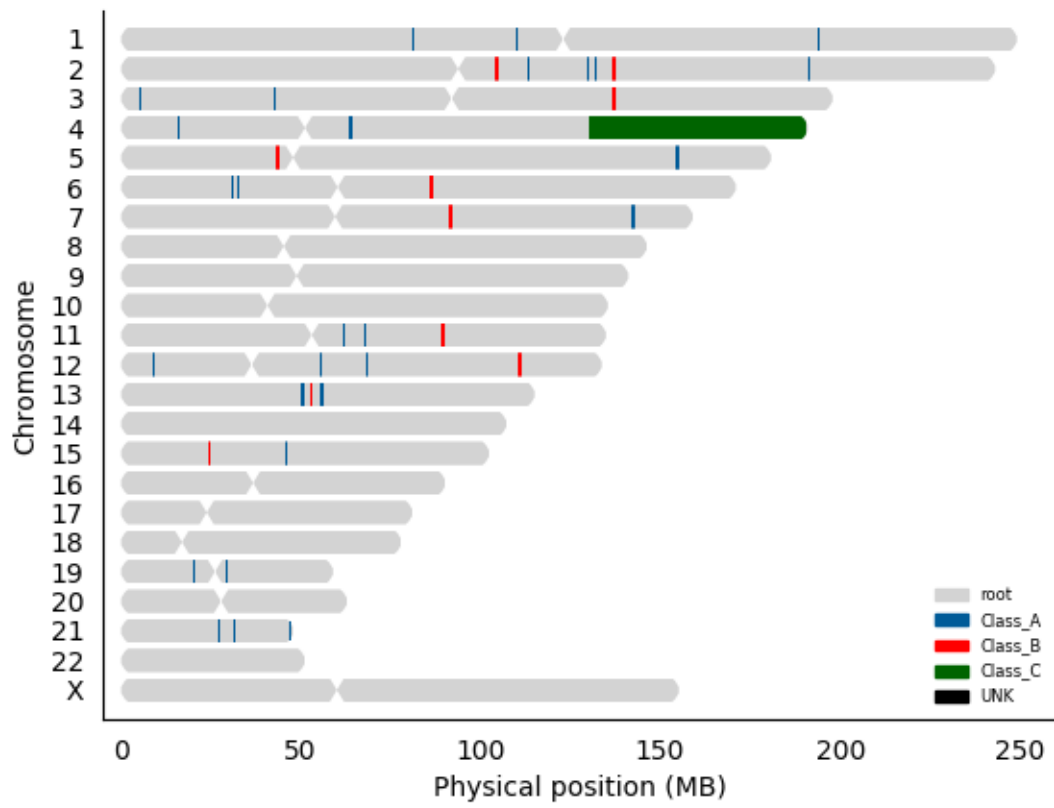

### Putative UPD19

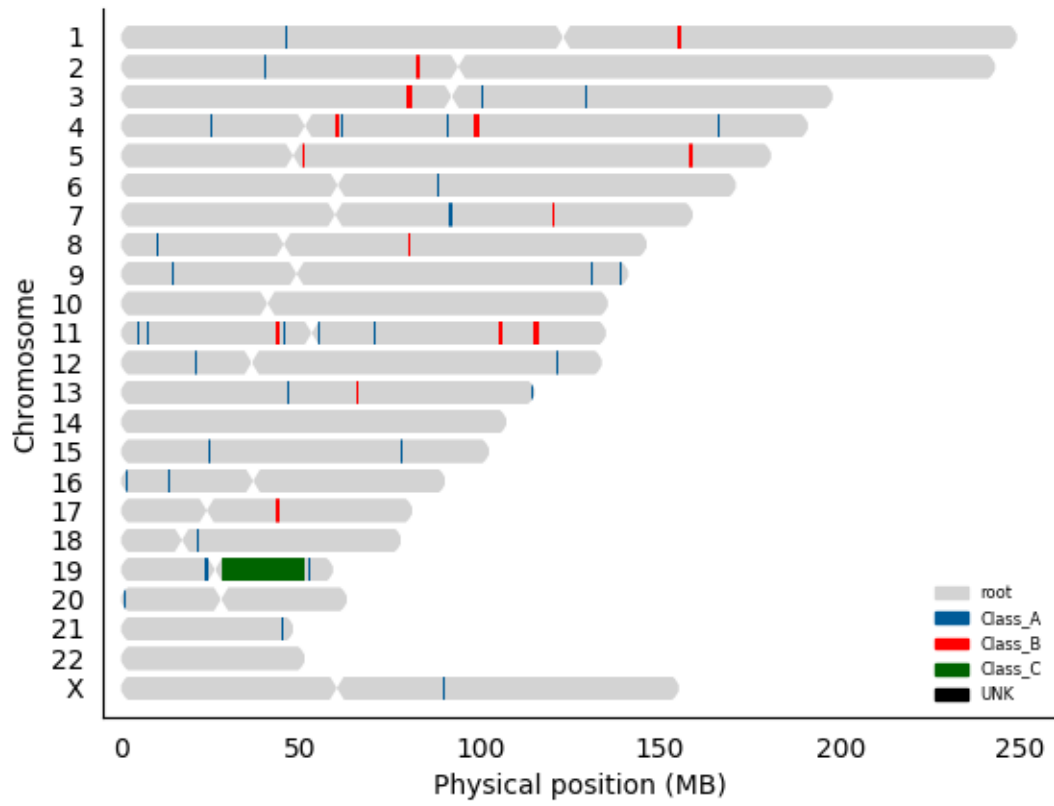

### Putative UPD4

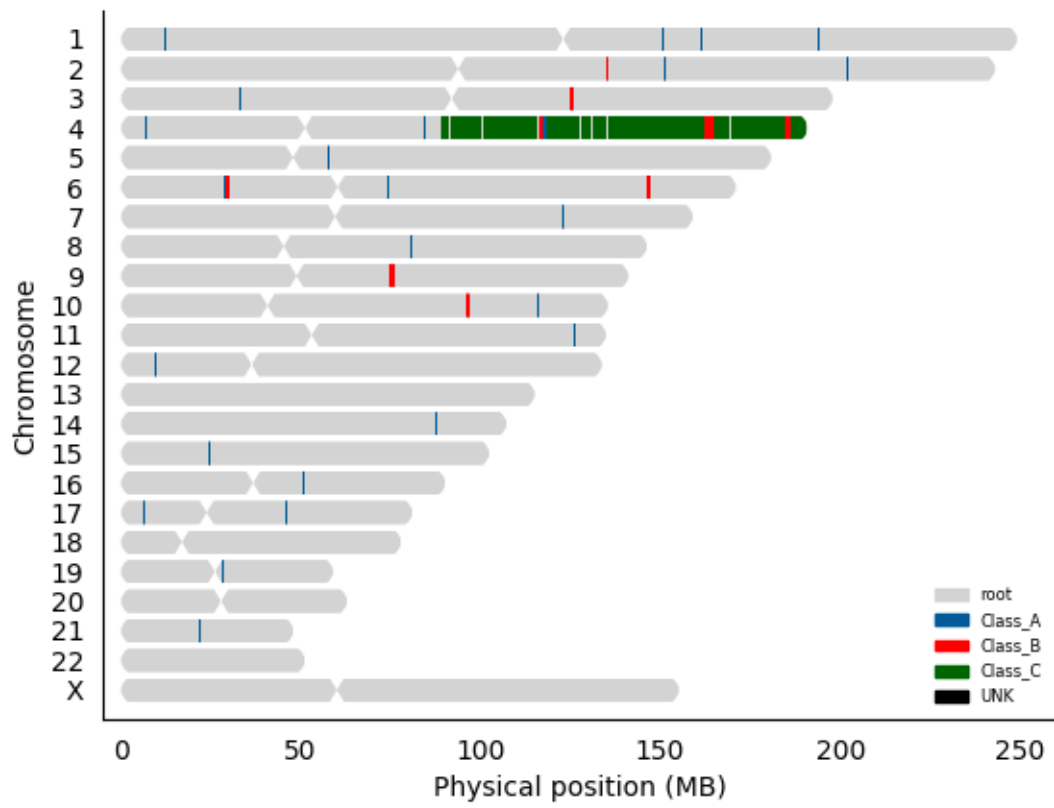

### Putative UPD13

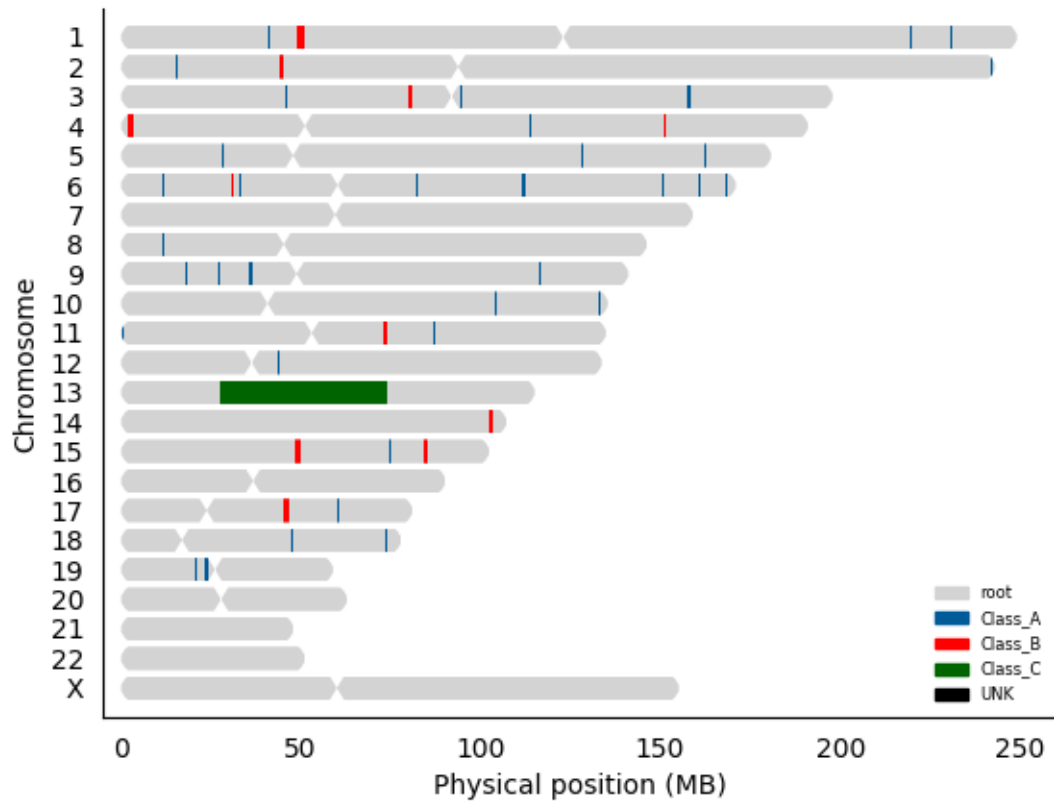

### Putative UPD19

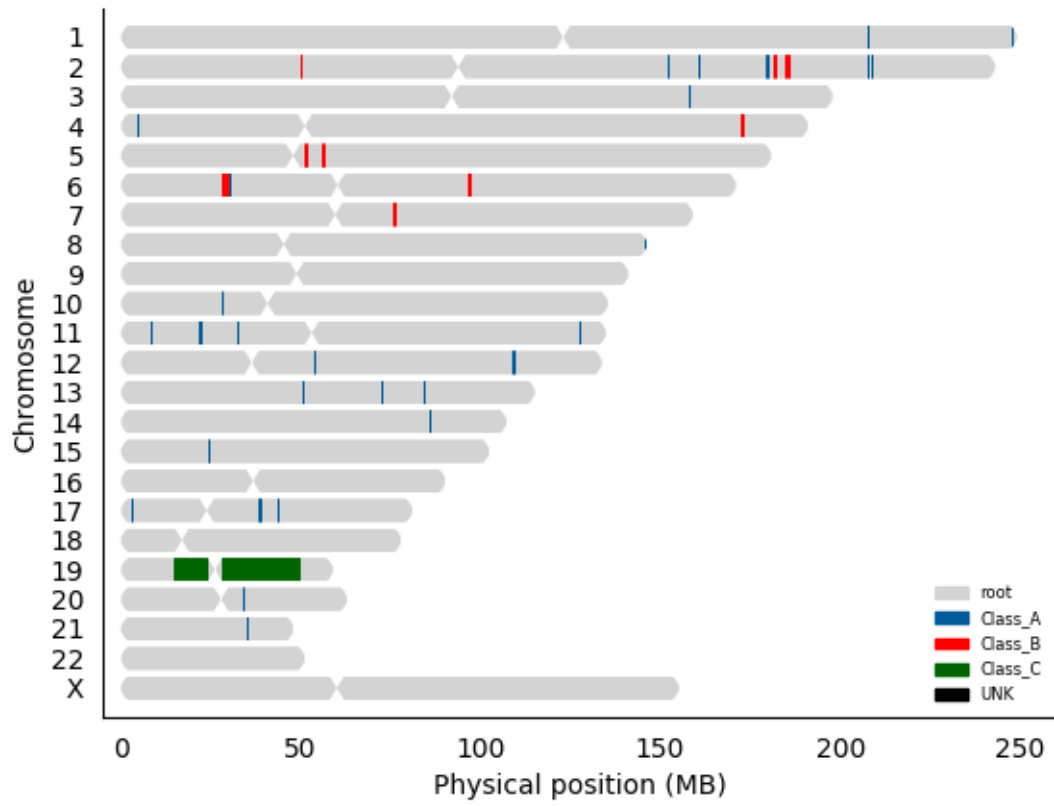

### Putative UPD13

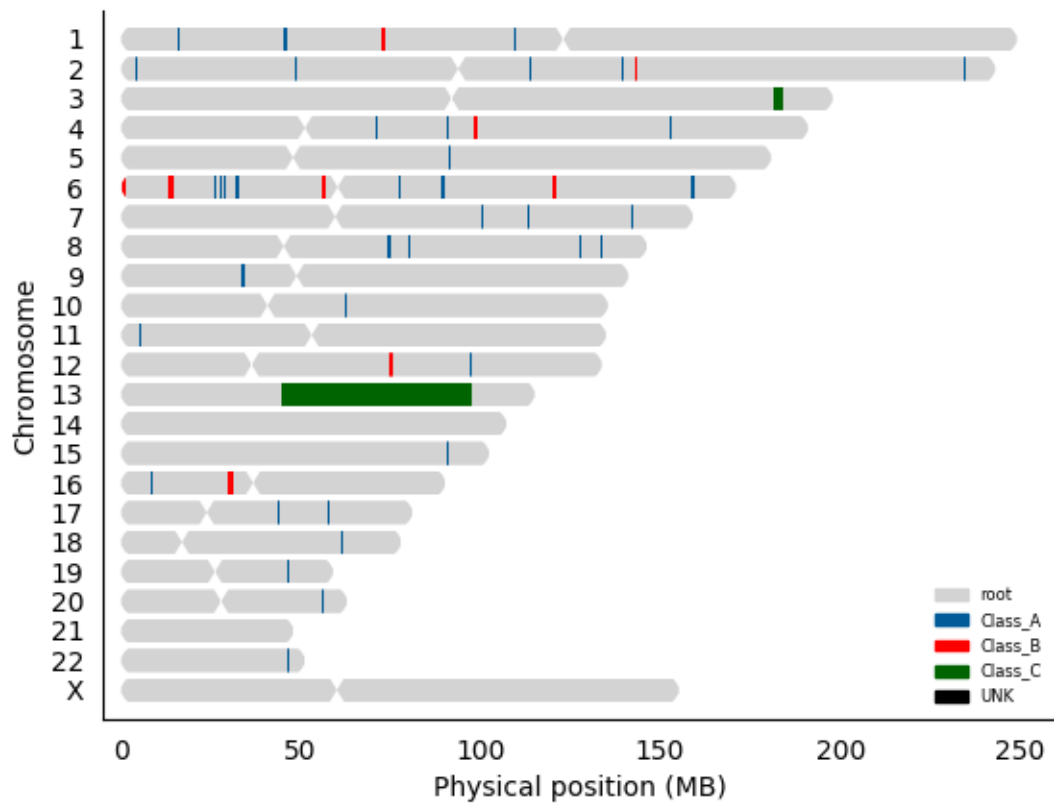



### Putative UPD4

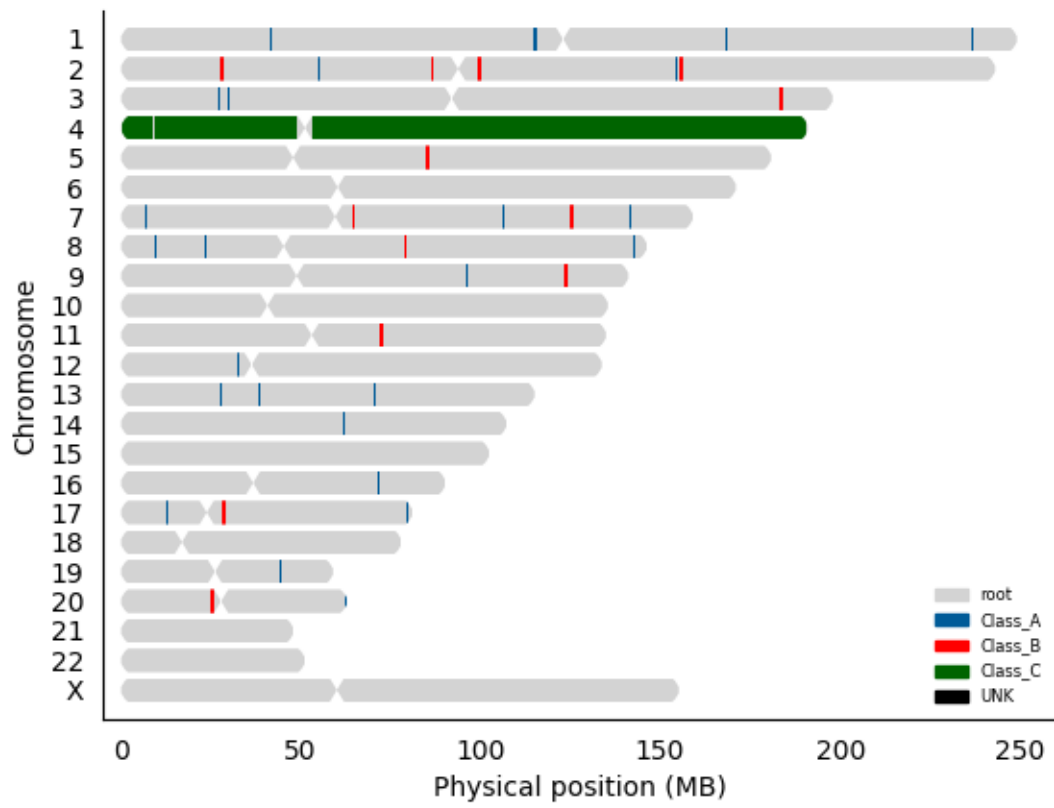

### Putative UPD19

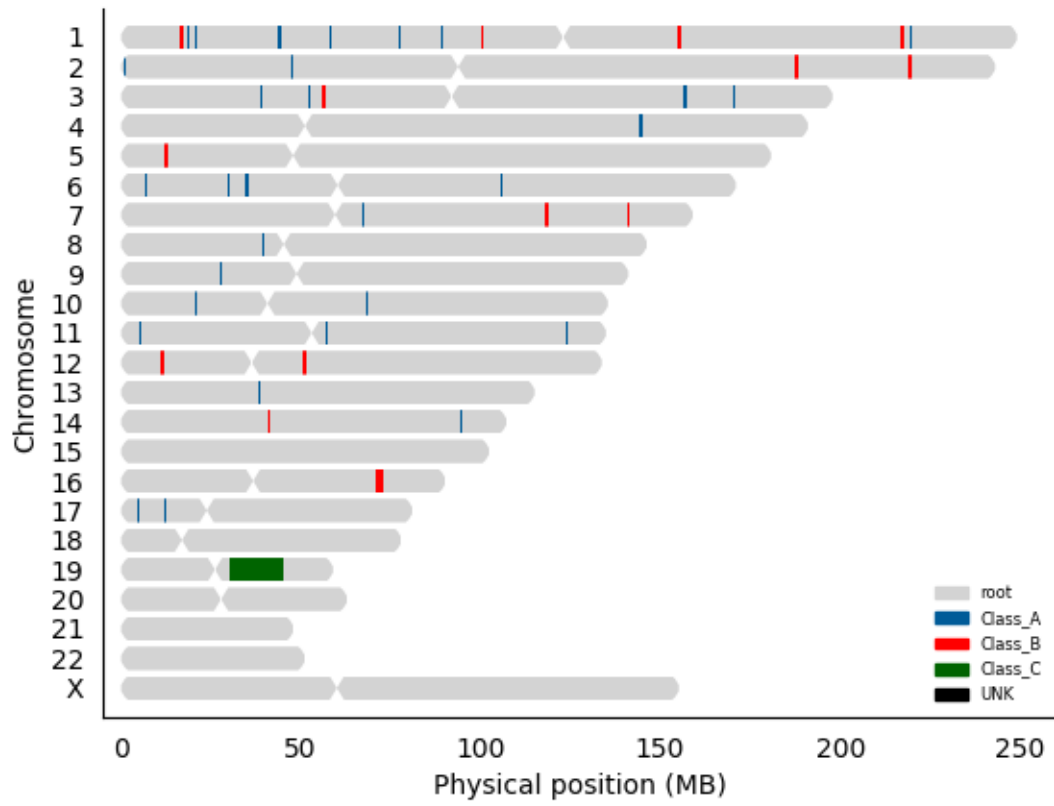

### Putative UPD13

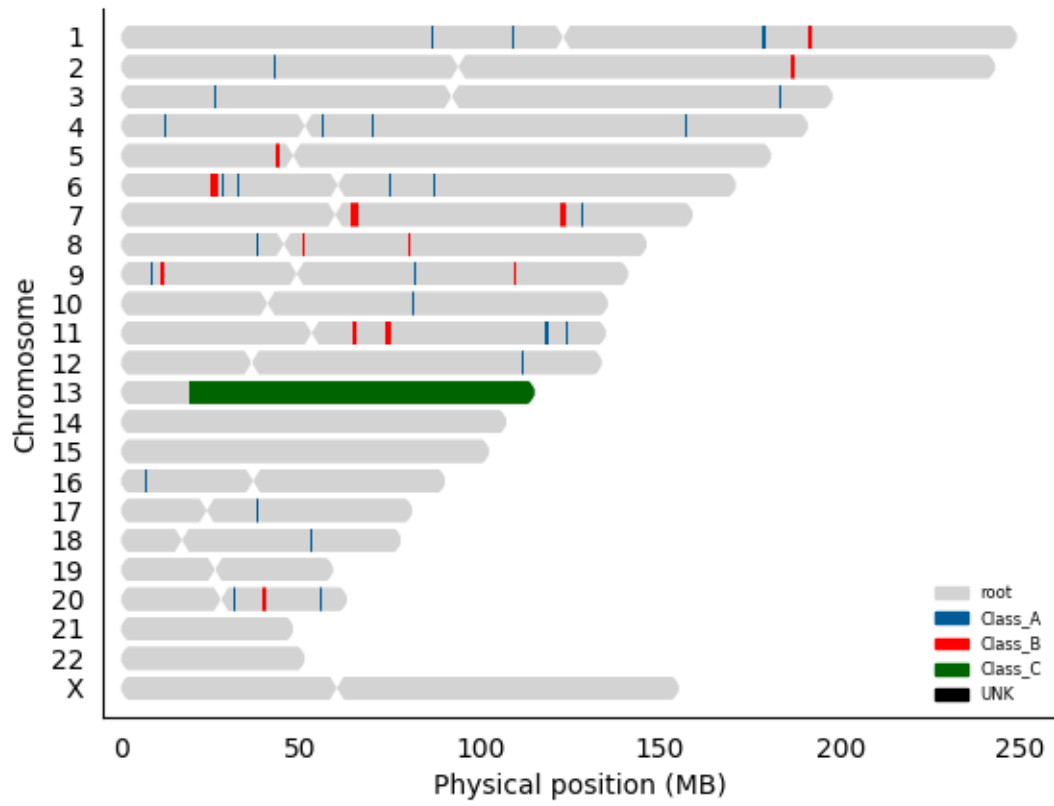

### Putative UPD3

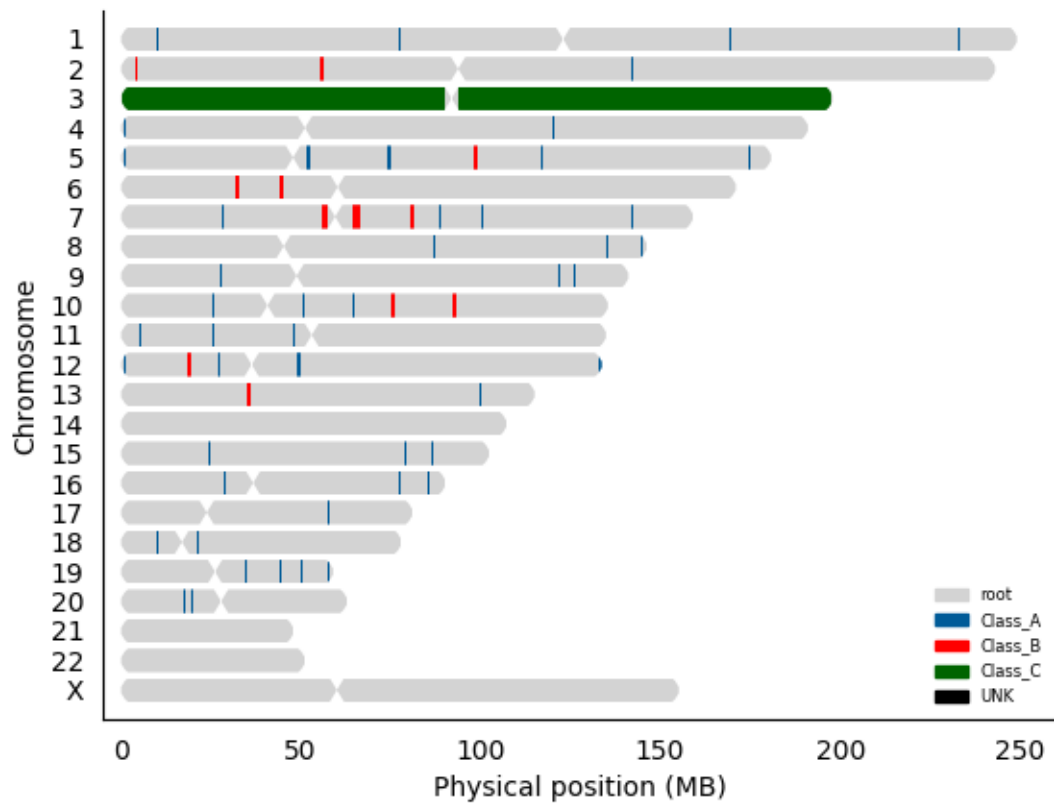

### Putative UPD1

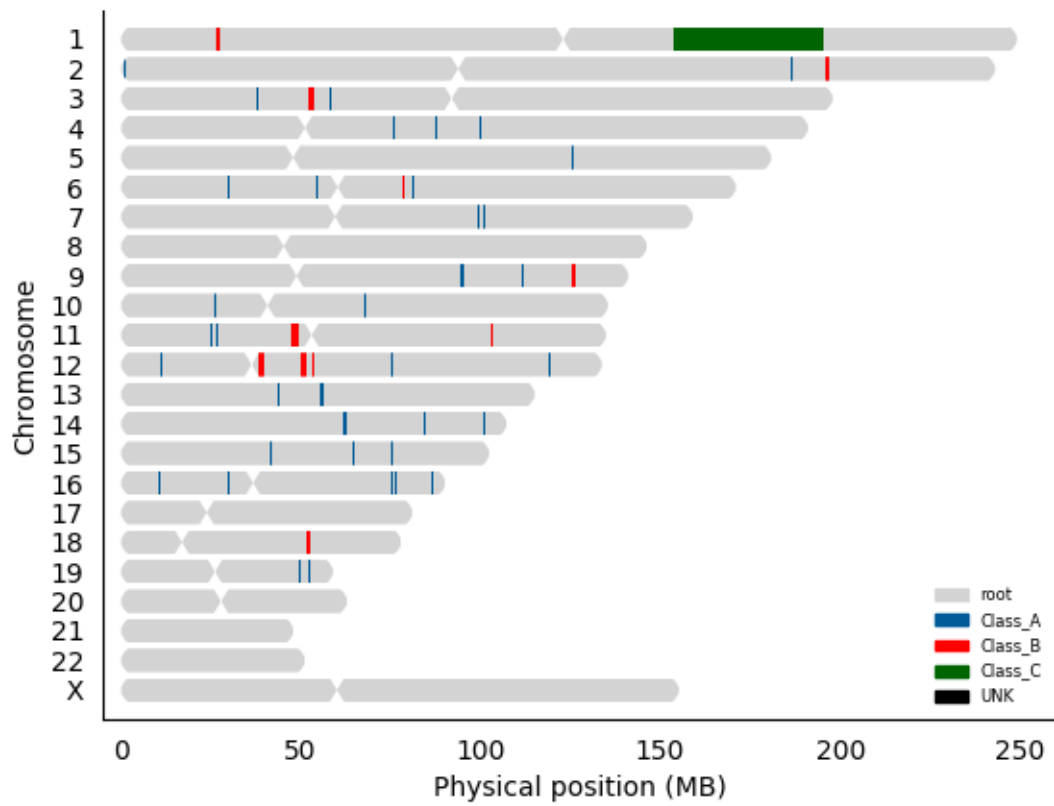

### Putative UPD19

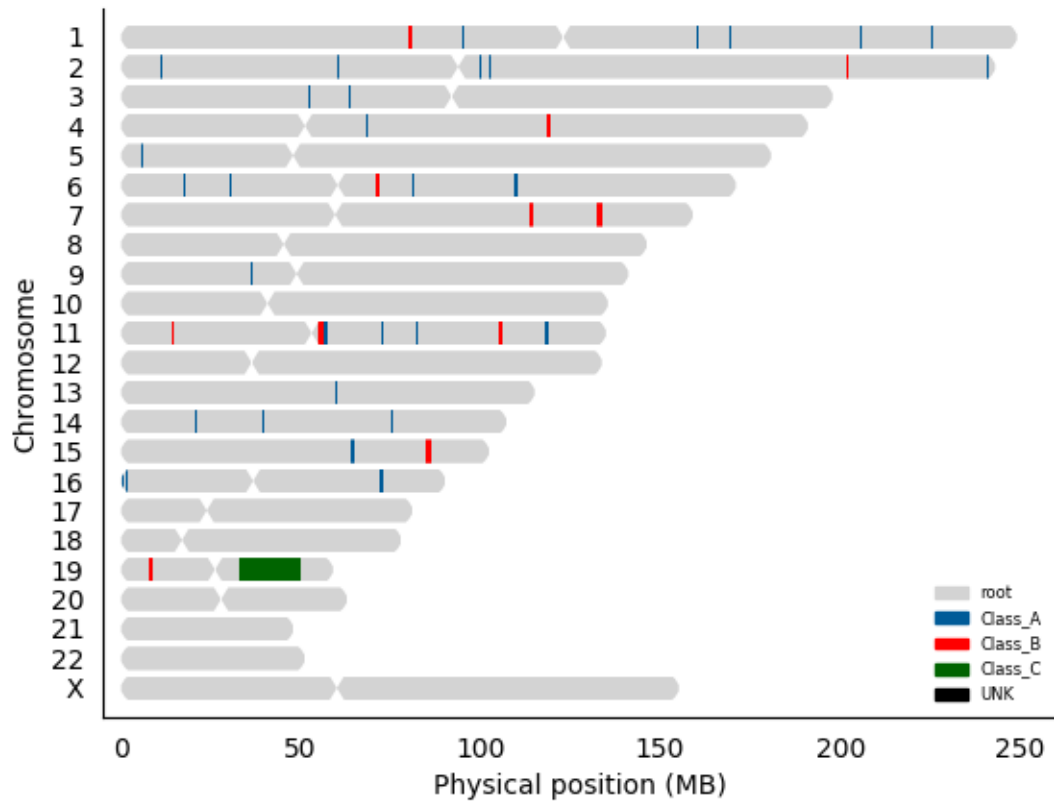

### Putative UPD3

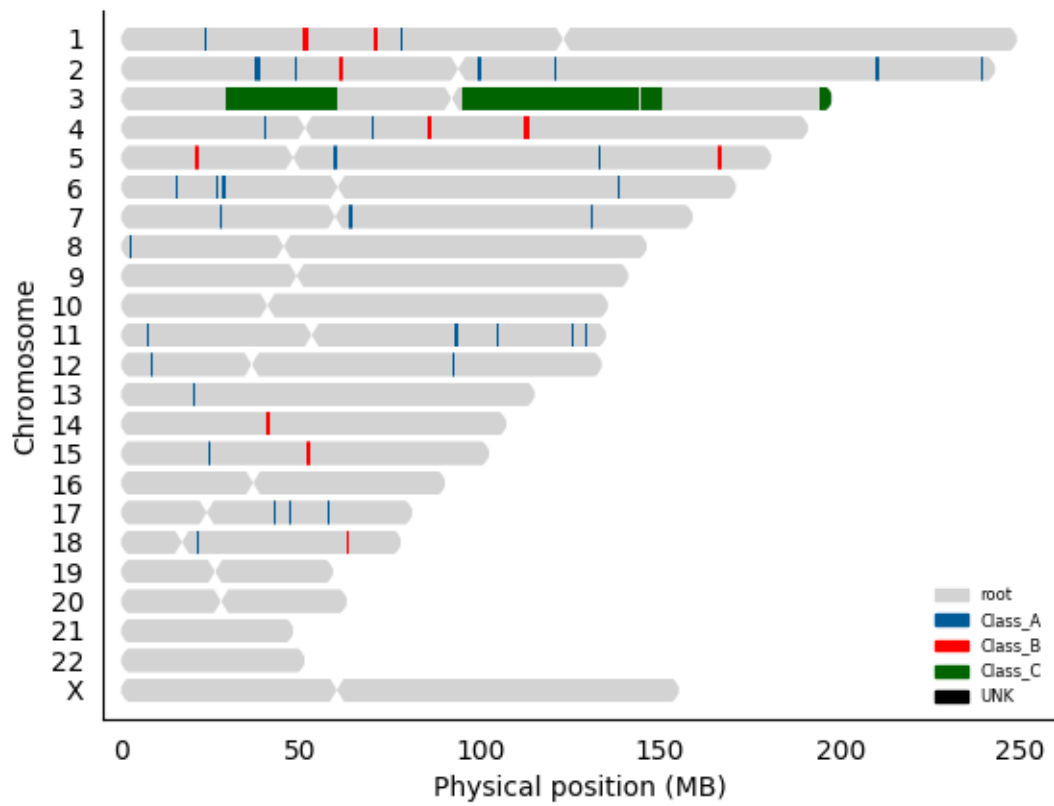

### Putative UPD19

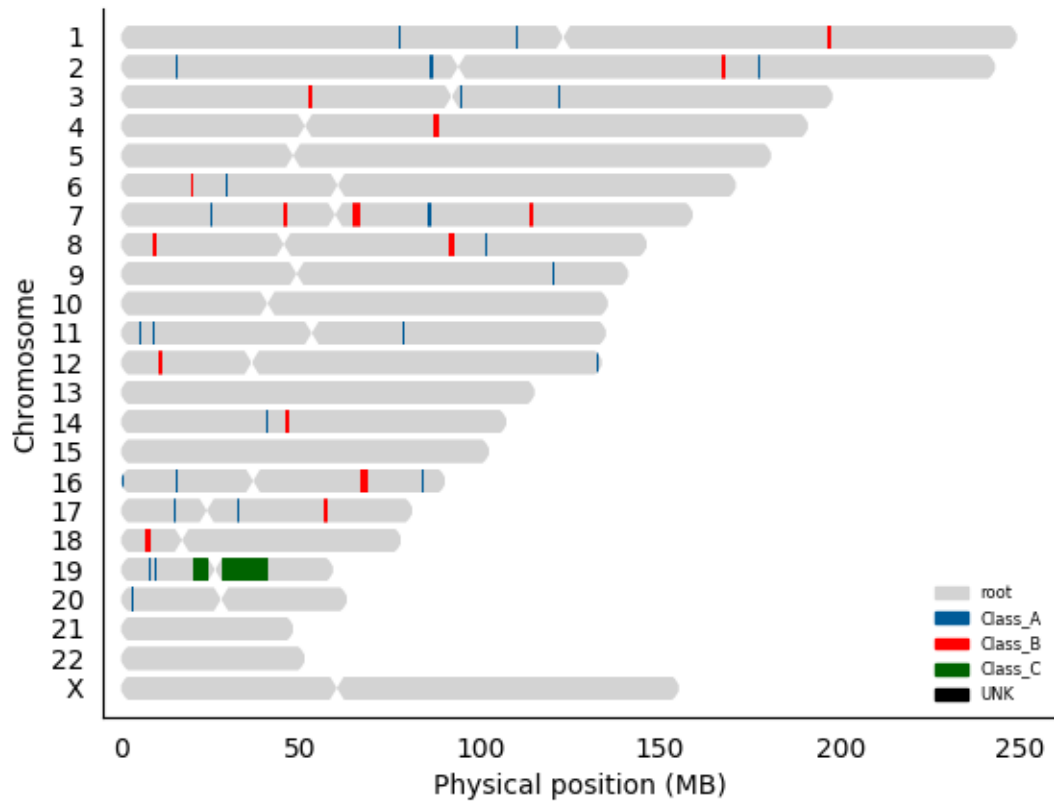



### Putative UPD3

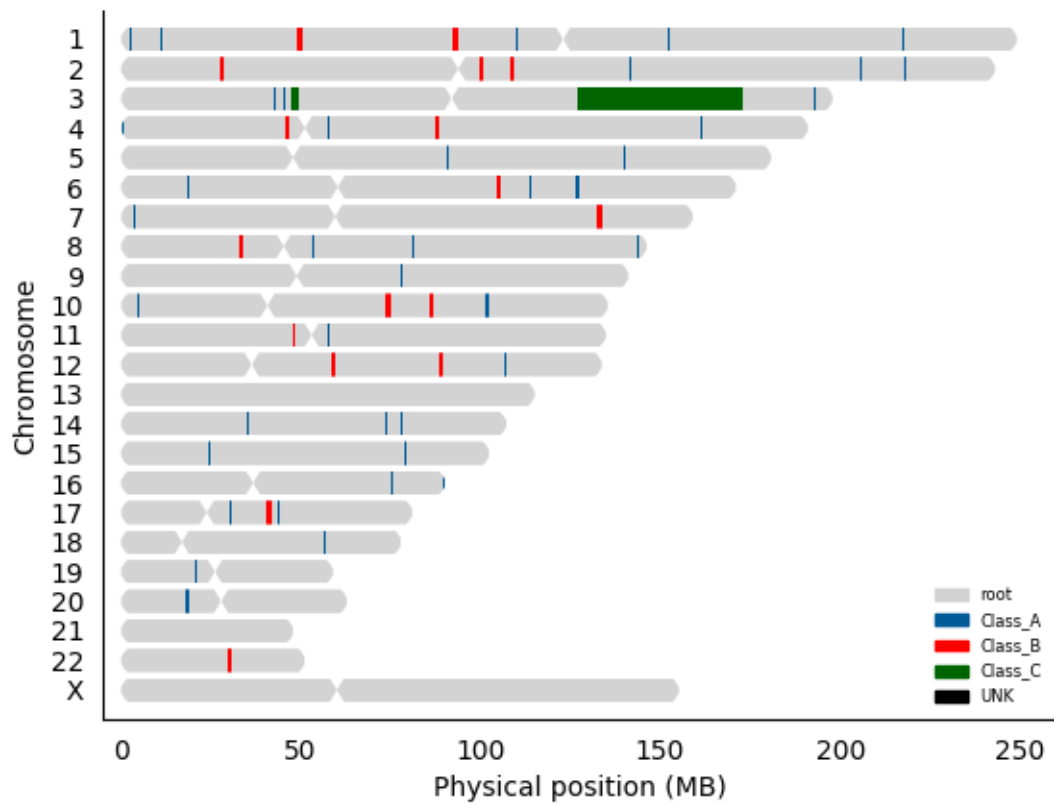

### Putative UPD12

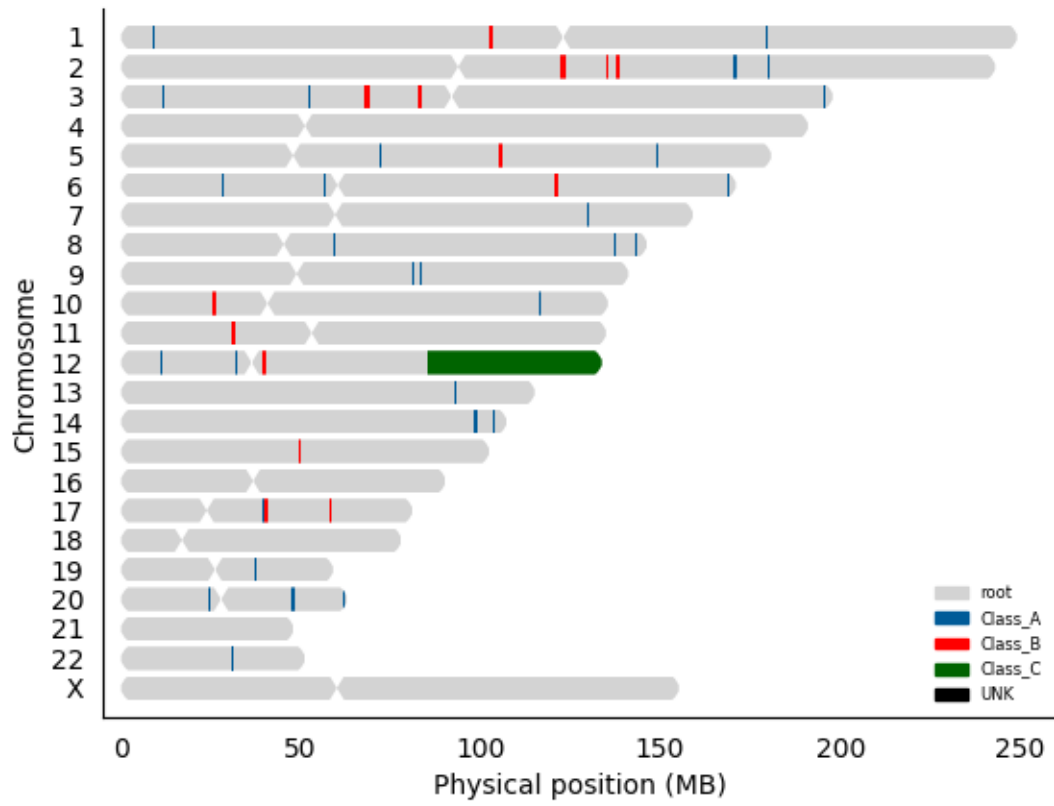

### Putative UPD18

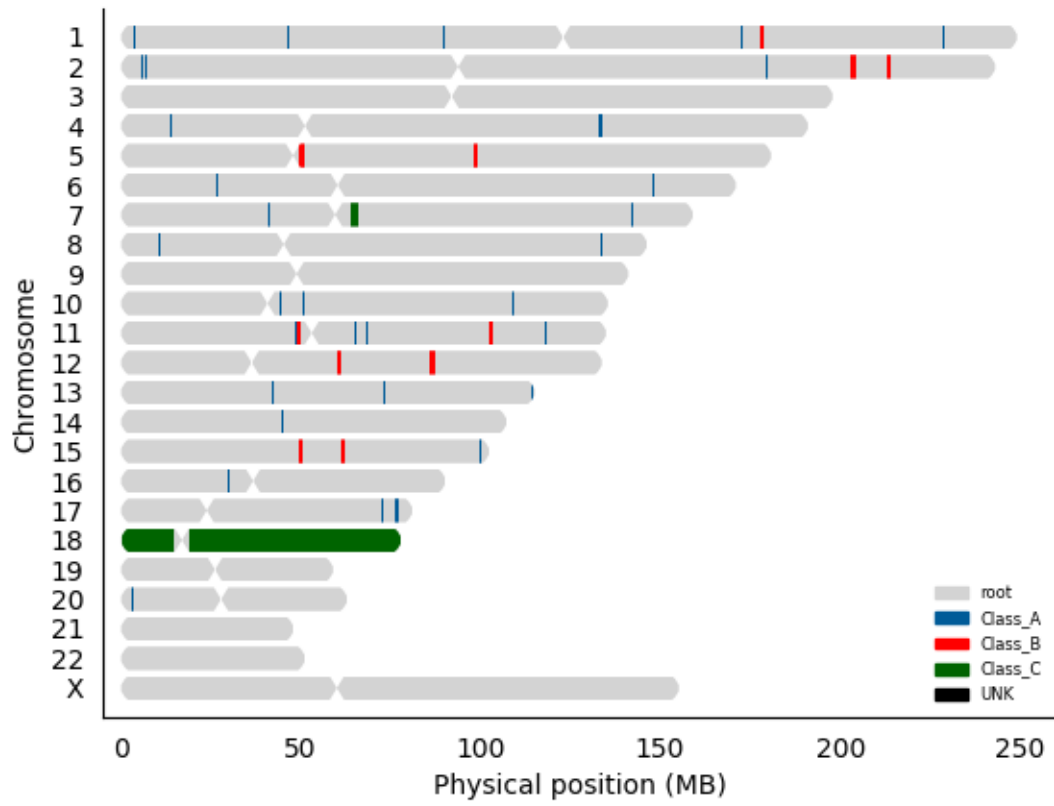

### Putative UPD1

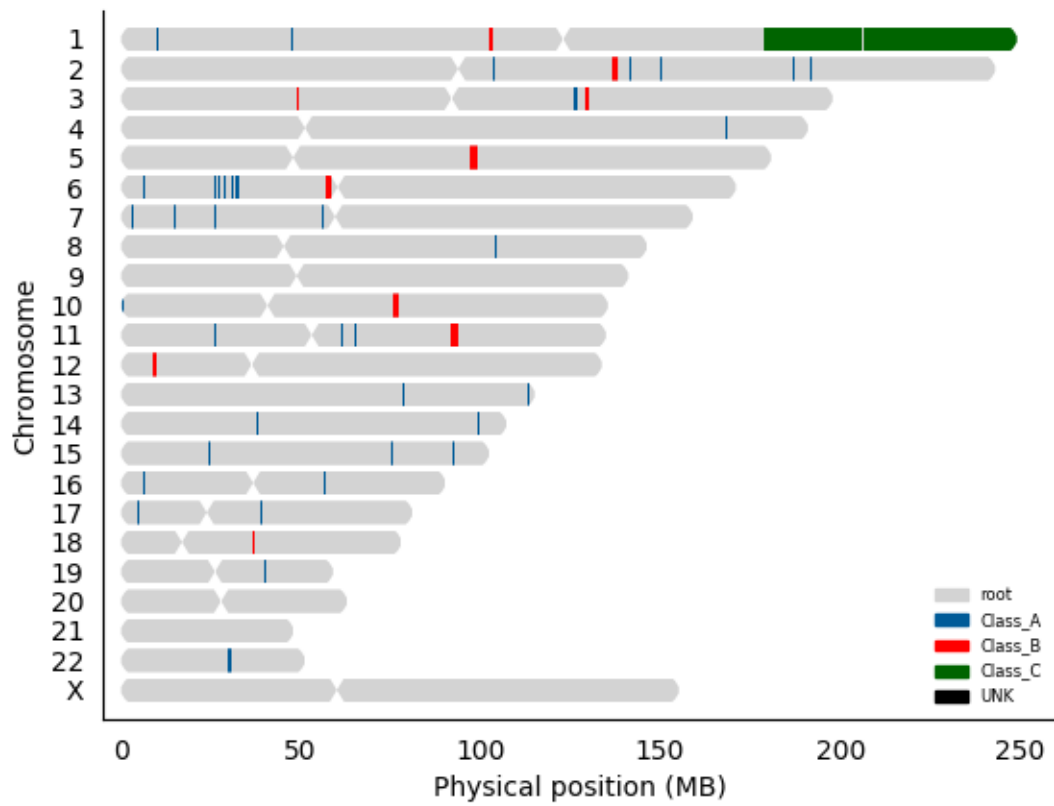

### Putative UPD3

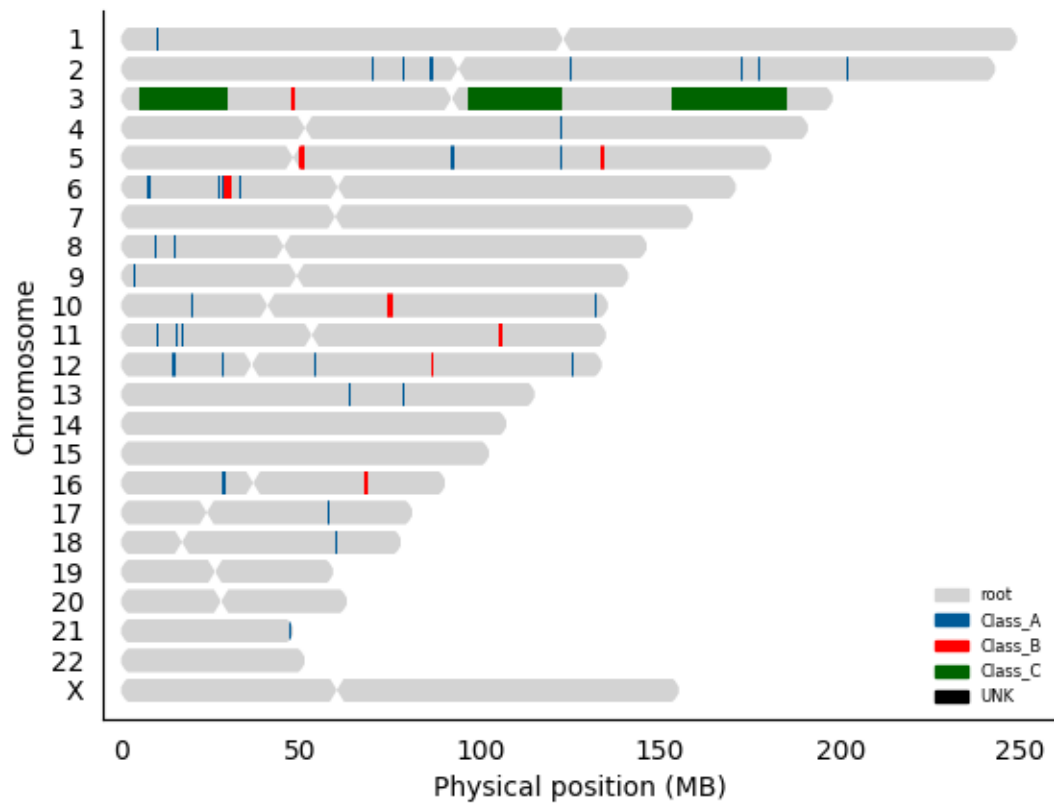

### Putative UPD18

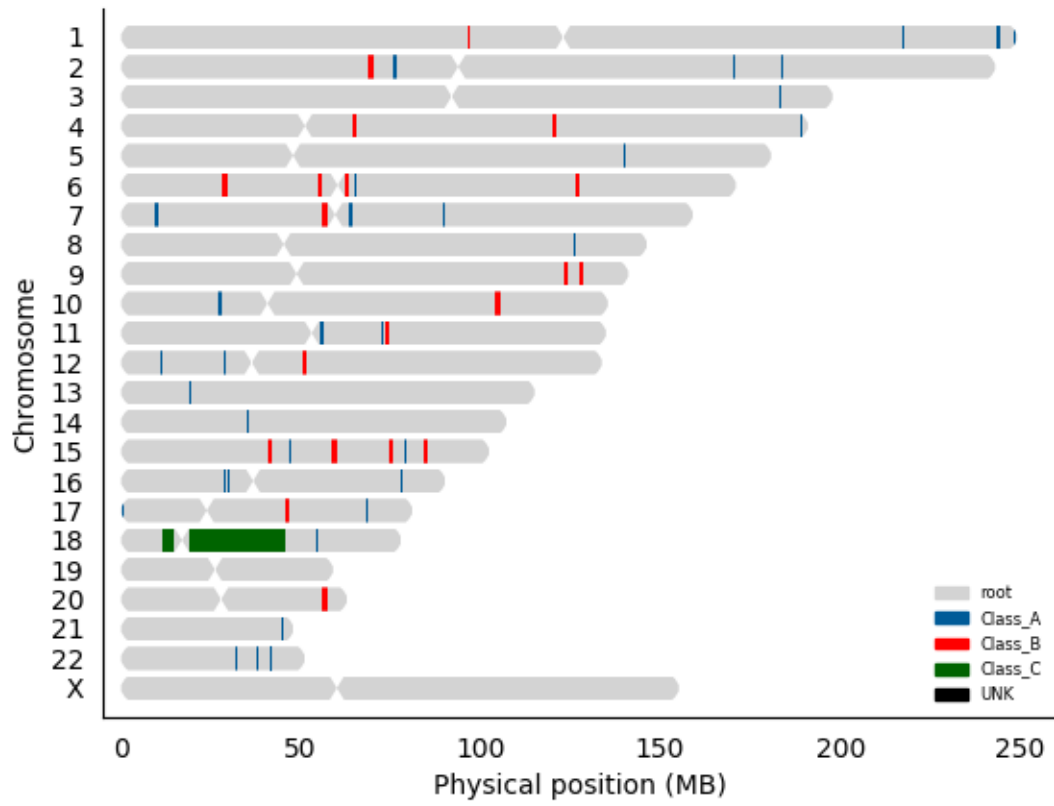

### Putative UPD1

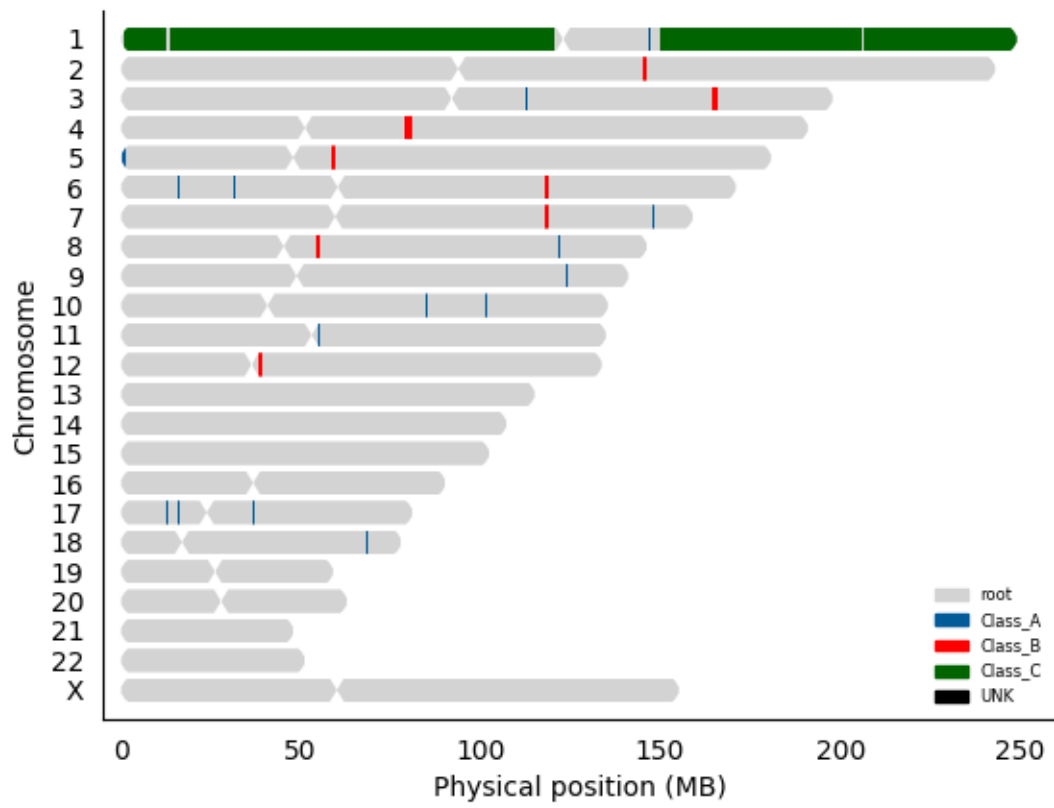

### Putative UPD3

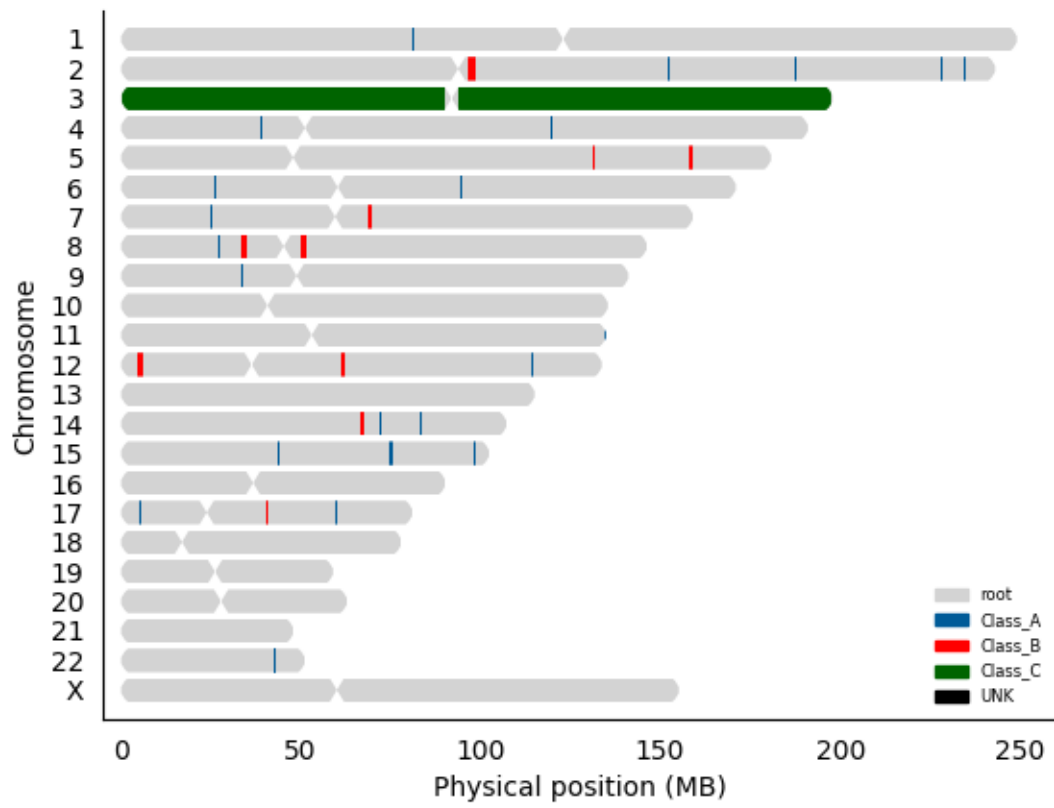



### Putative UPD18

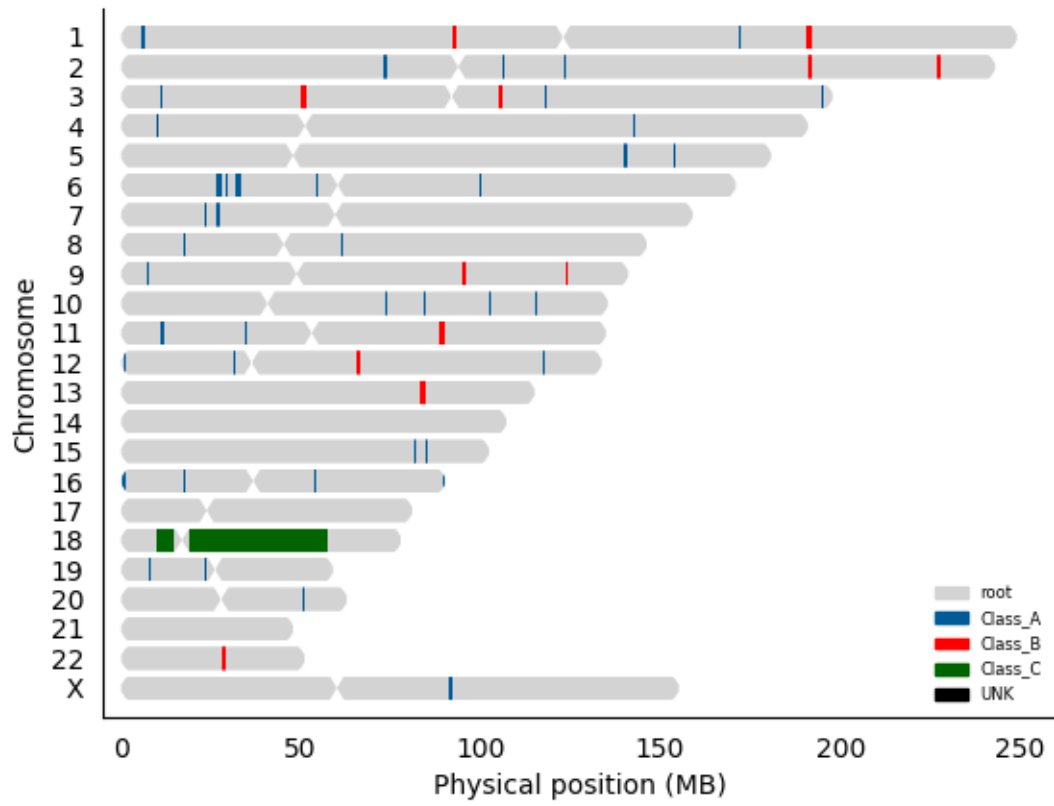

### Putative UPD12

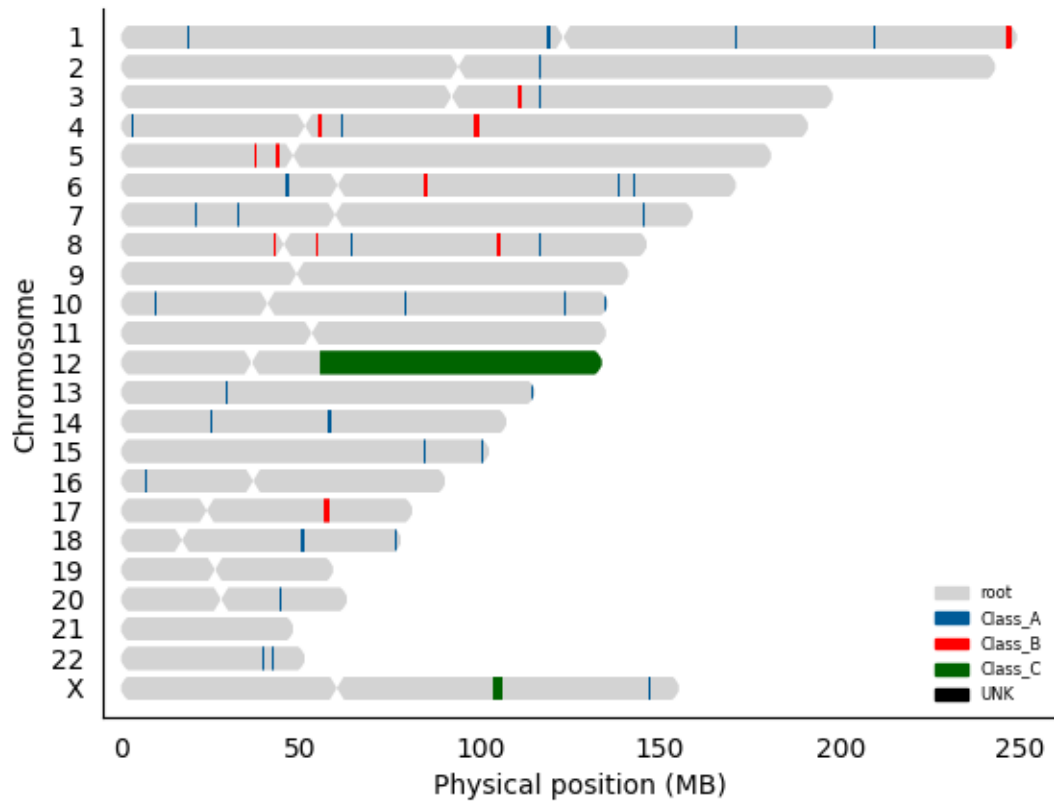

### Putative UPD2

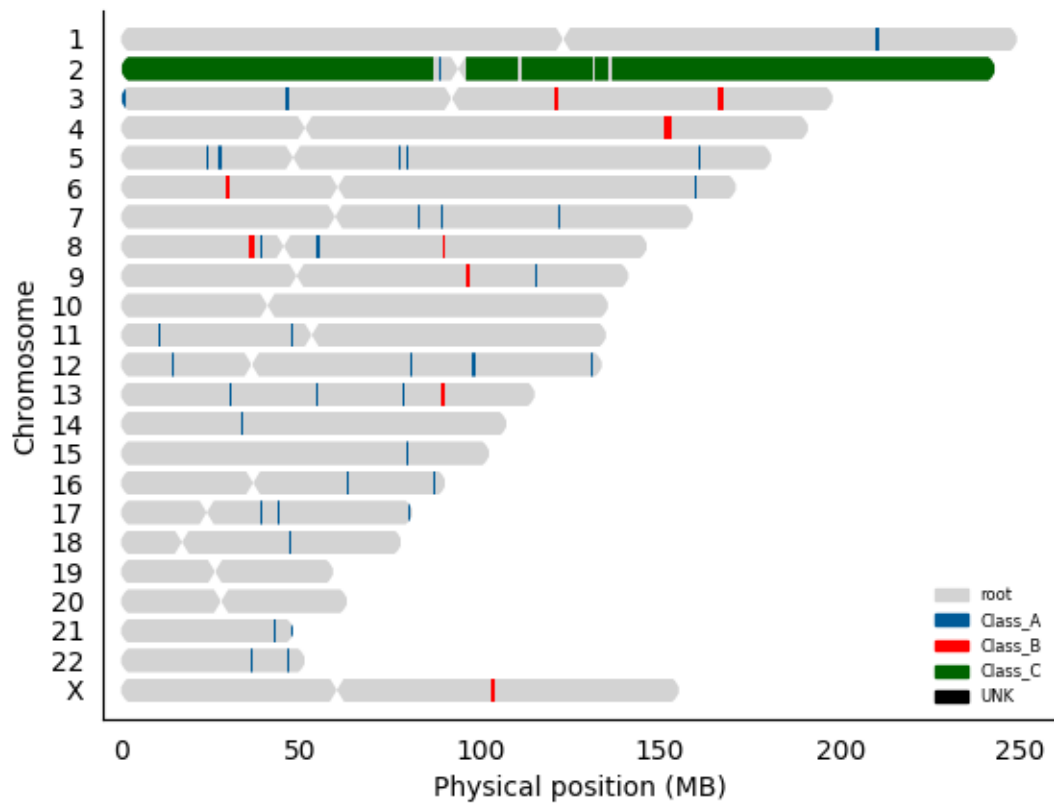

### Putative UPD18

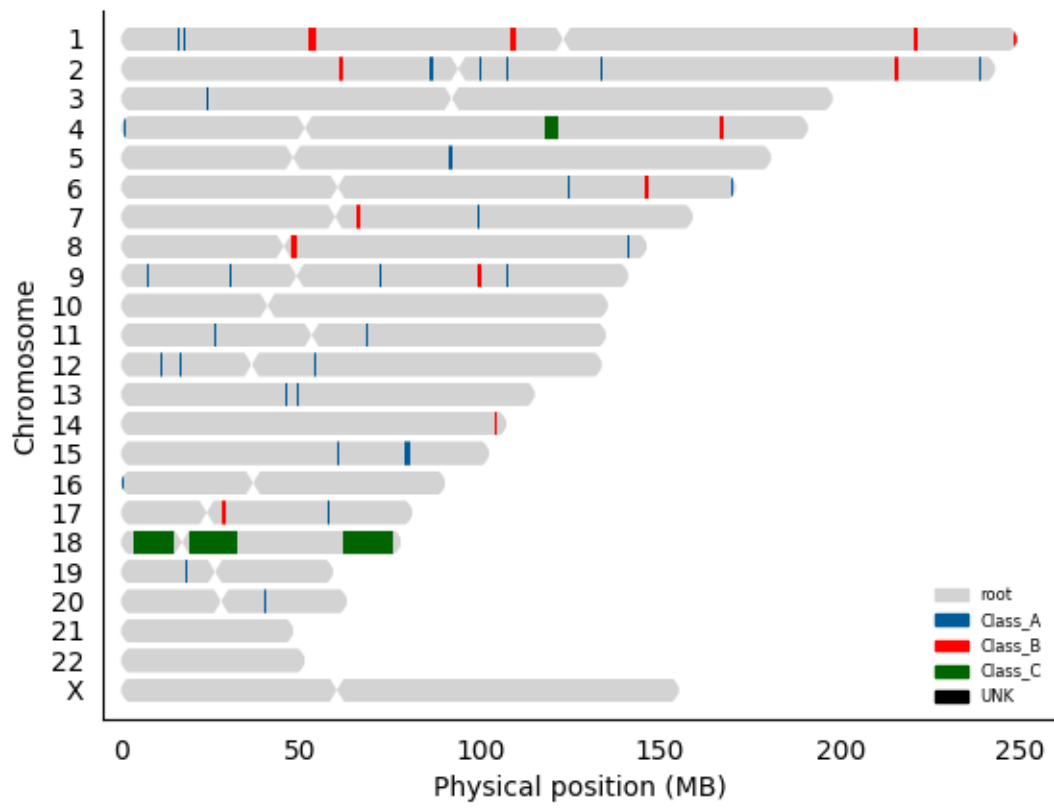

### Putative UPD12

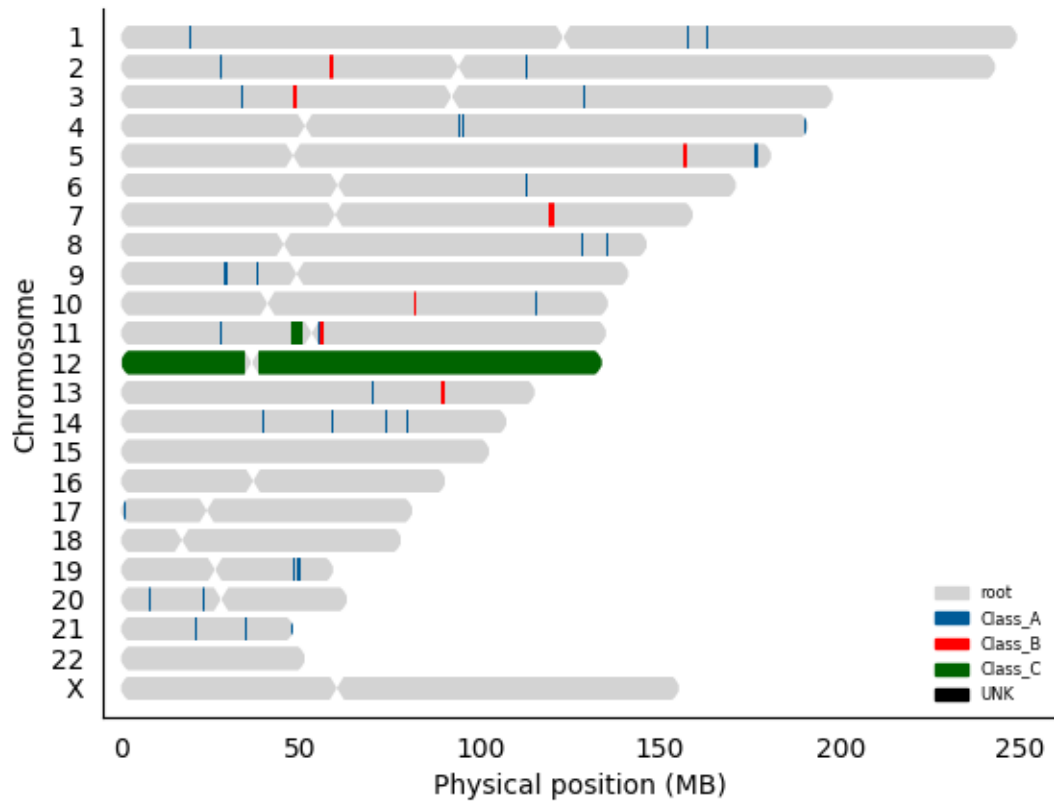

### Putative UPD2

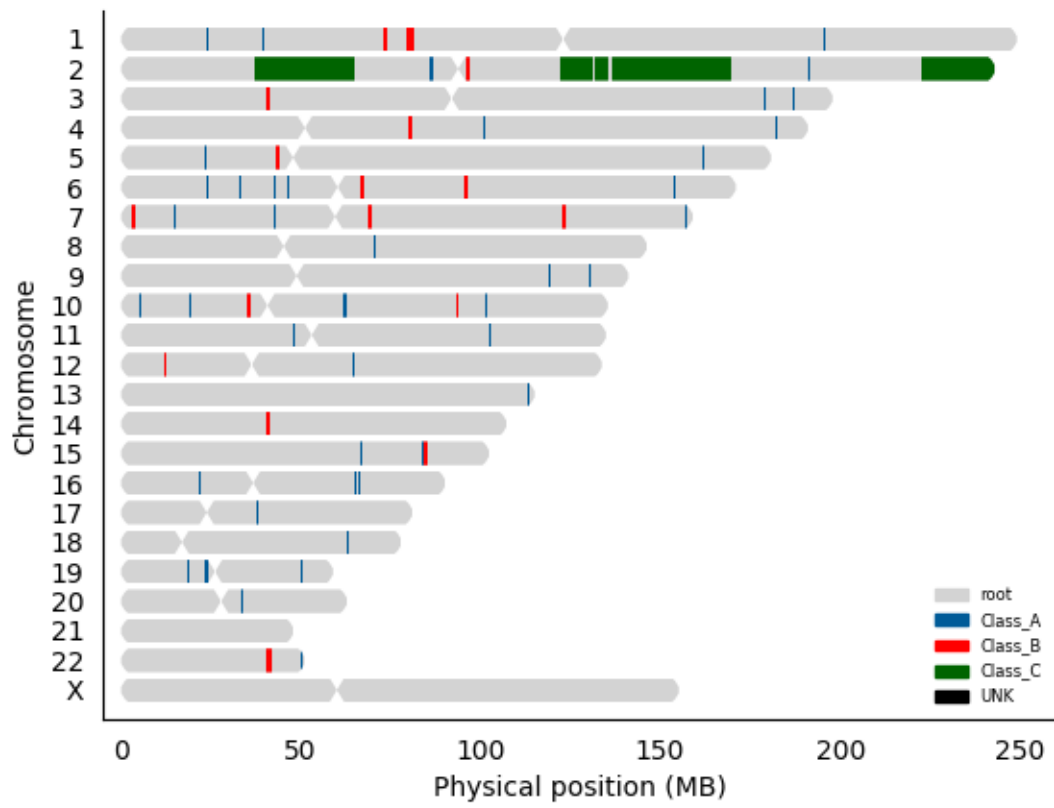

### Putative UPD18

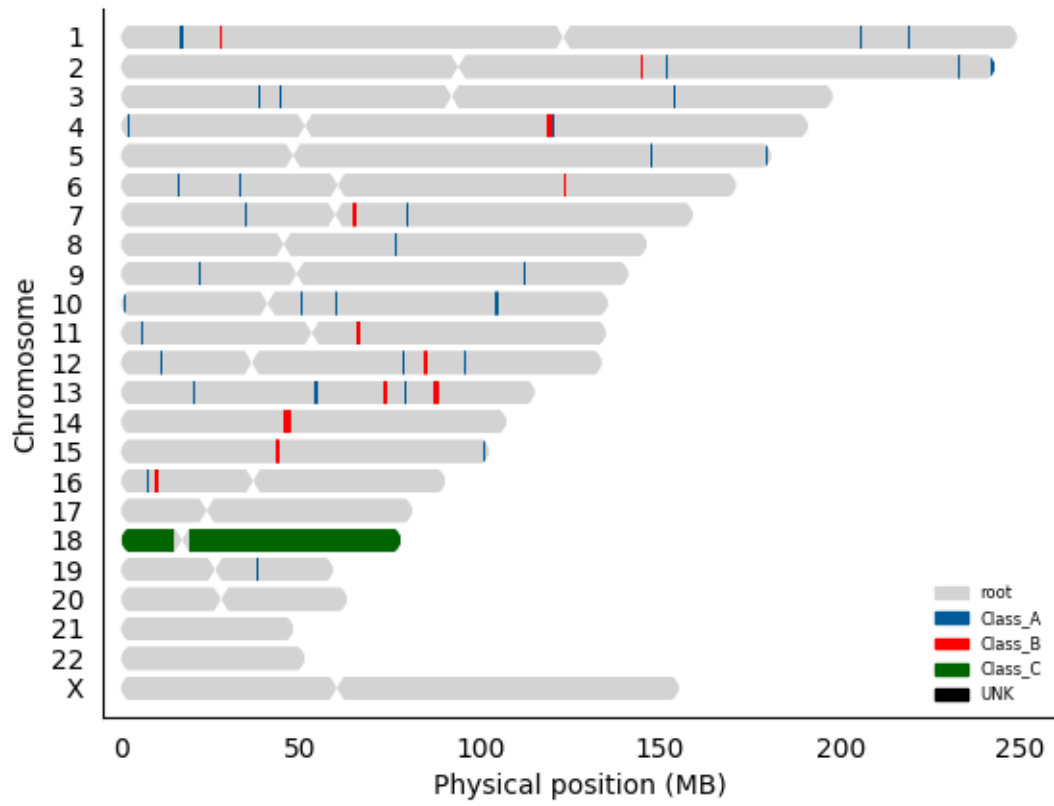

### Putative UPD1

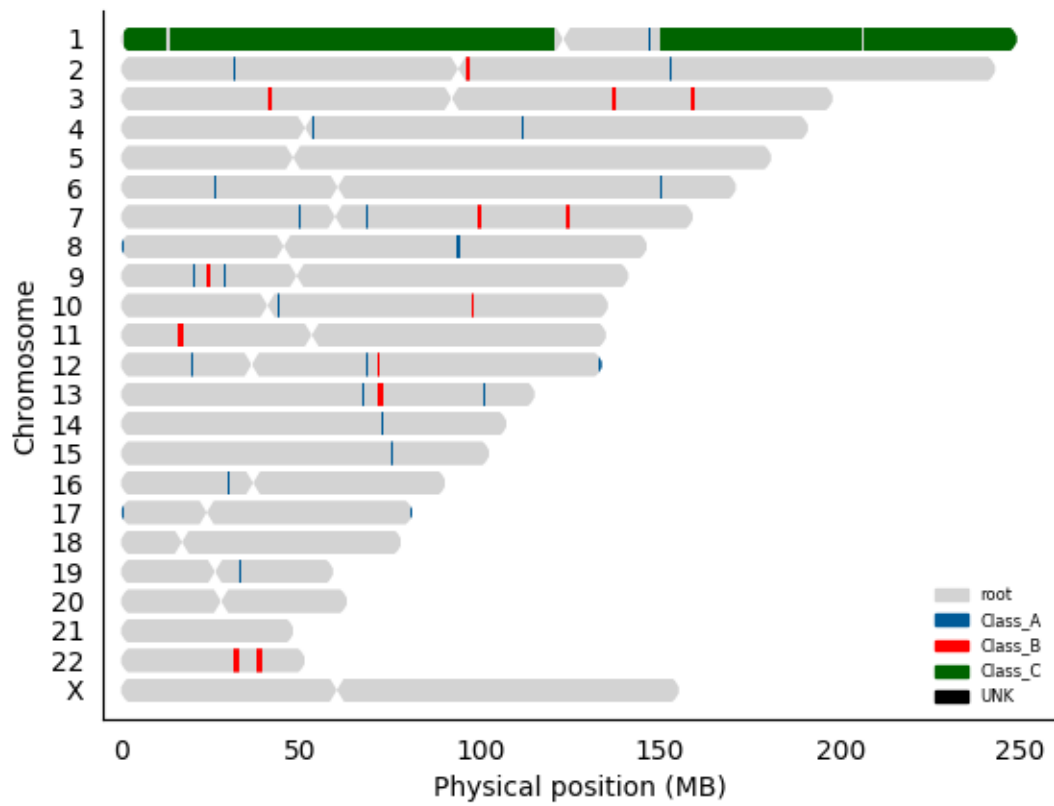



### Putative UPD2

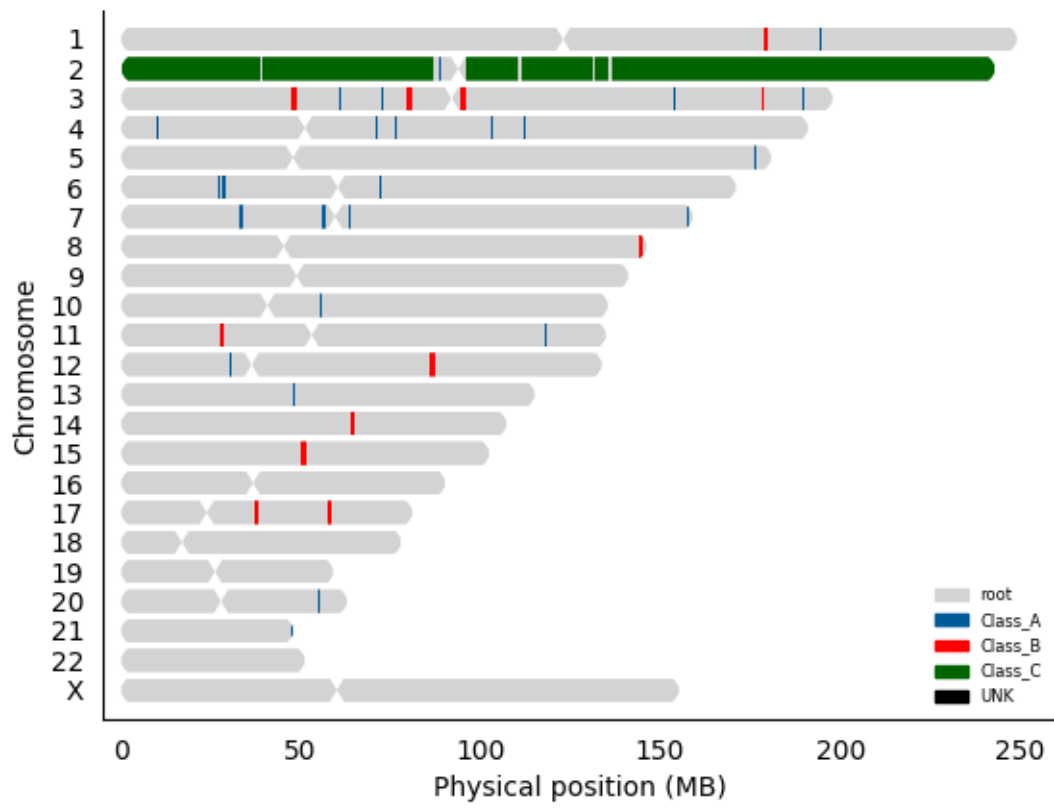

### Putative UPD17

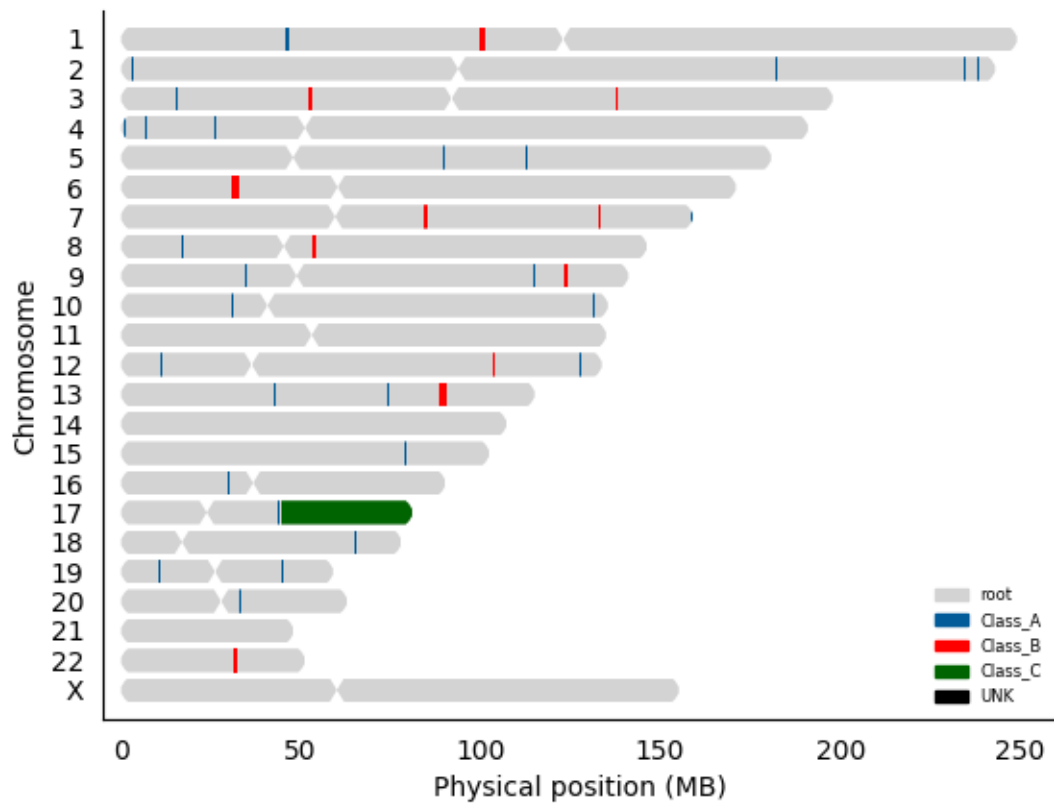

### Putative UPD12

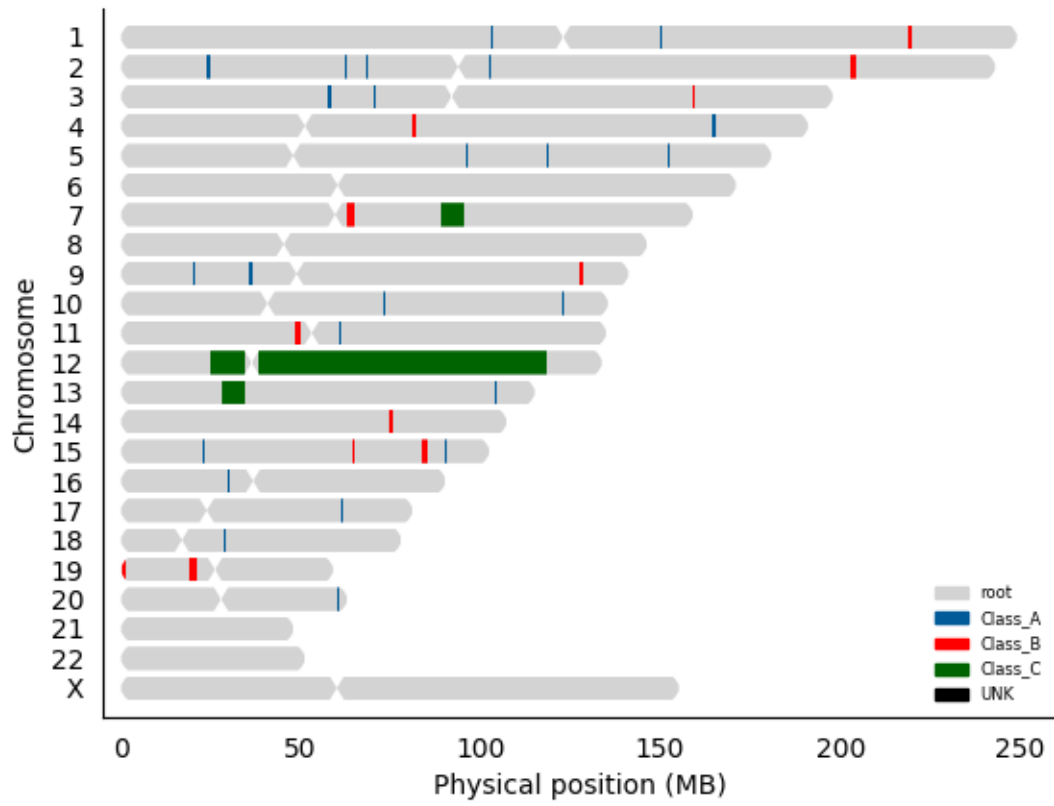

### Putative UPD2

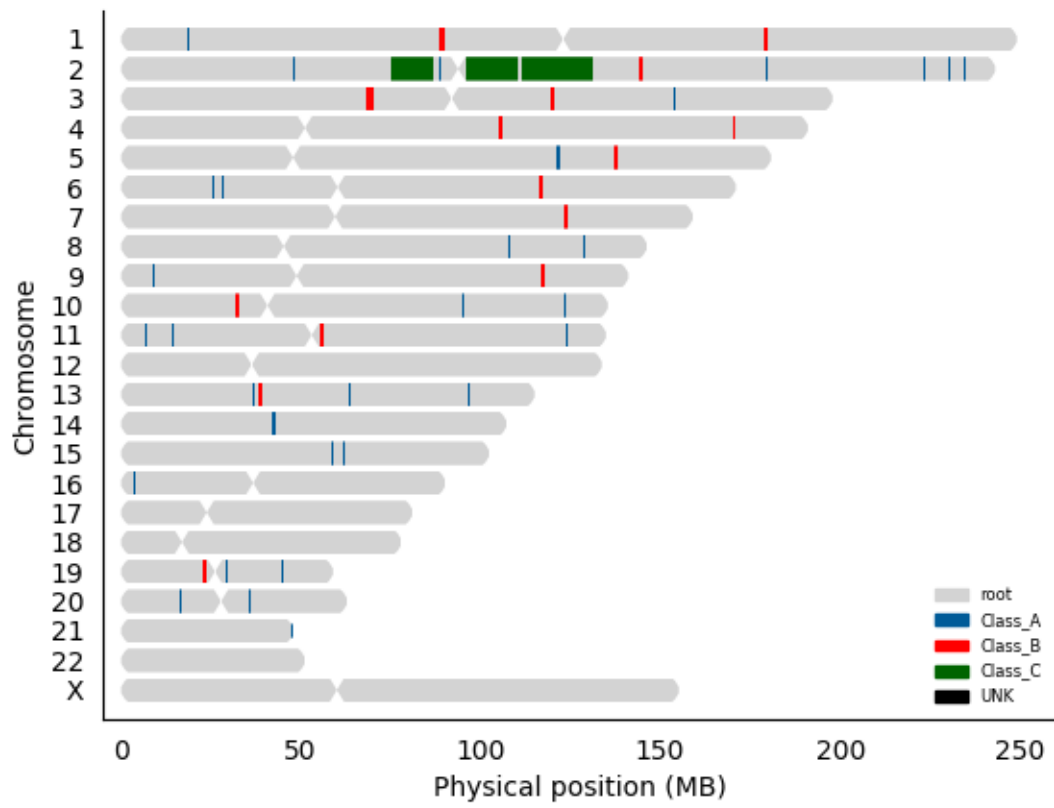

### Putative UPD17

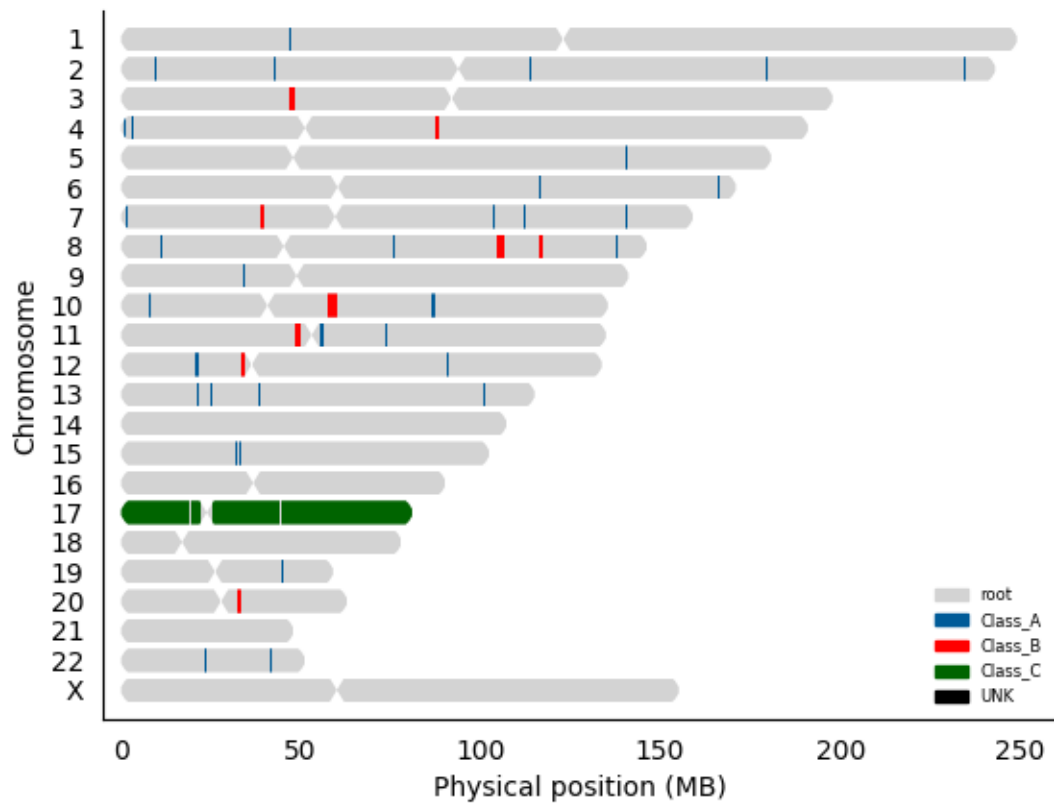

### Putative UPD1

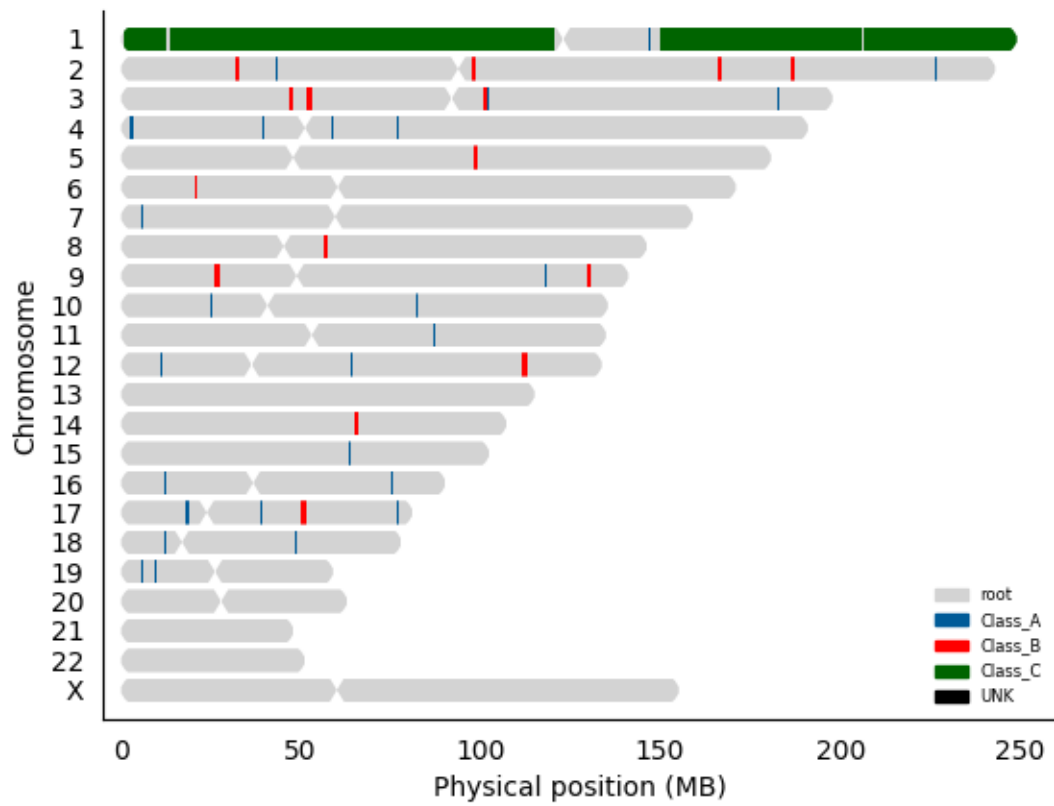

### Putative UPD2

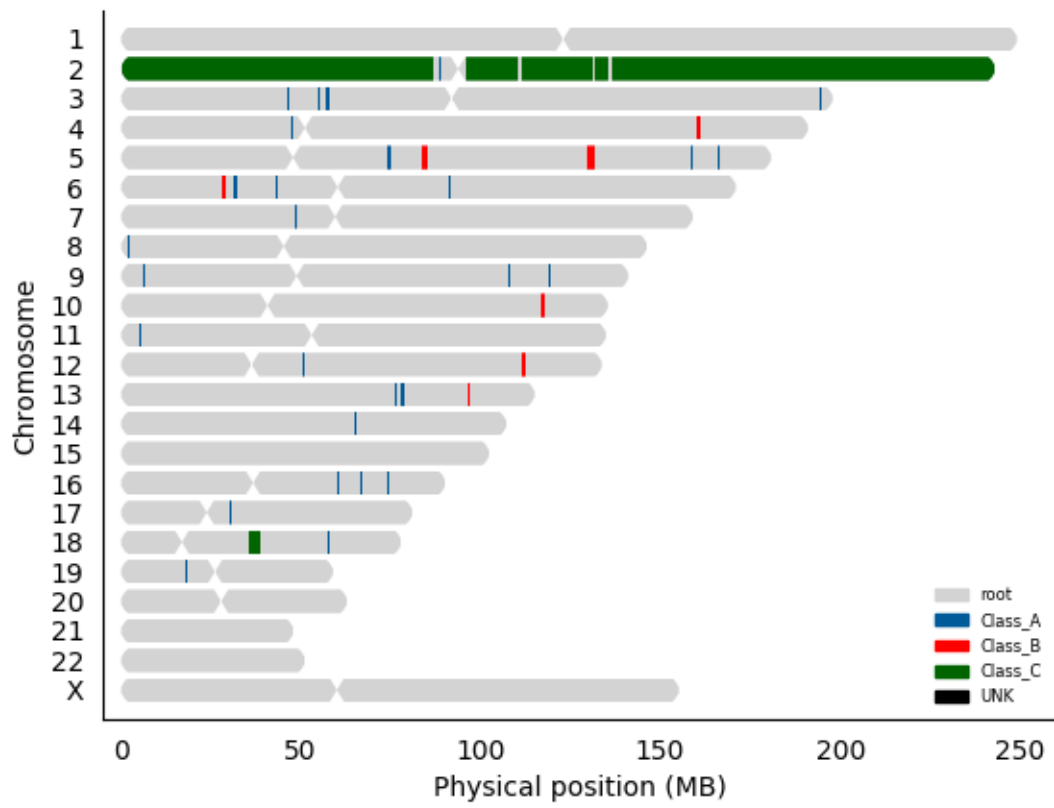

### Putative UPD17

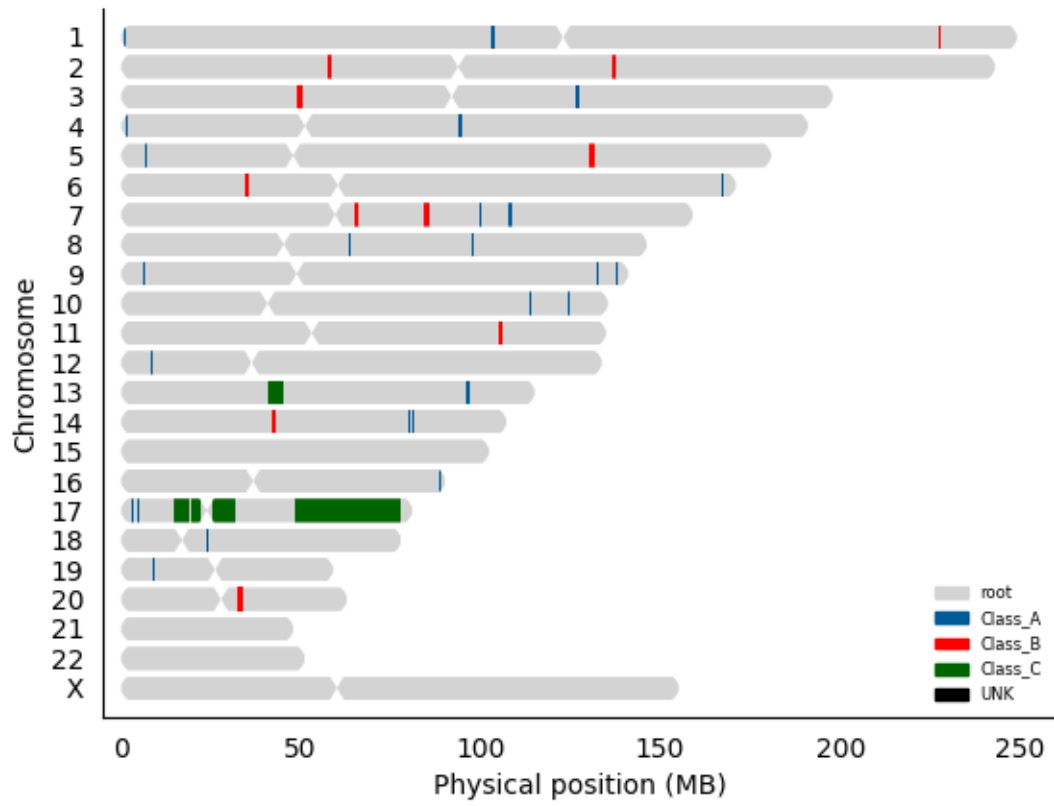



### Putative UPD11

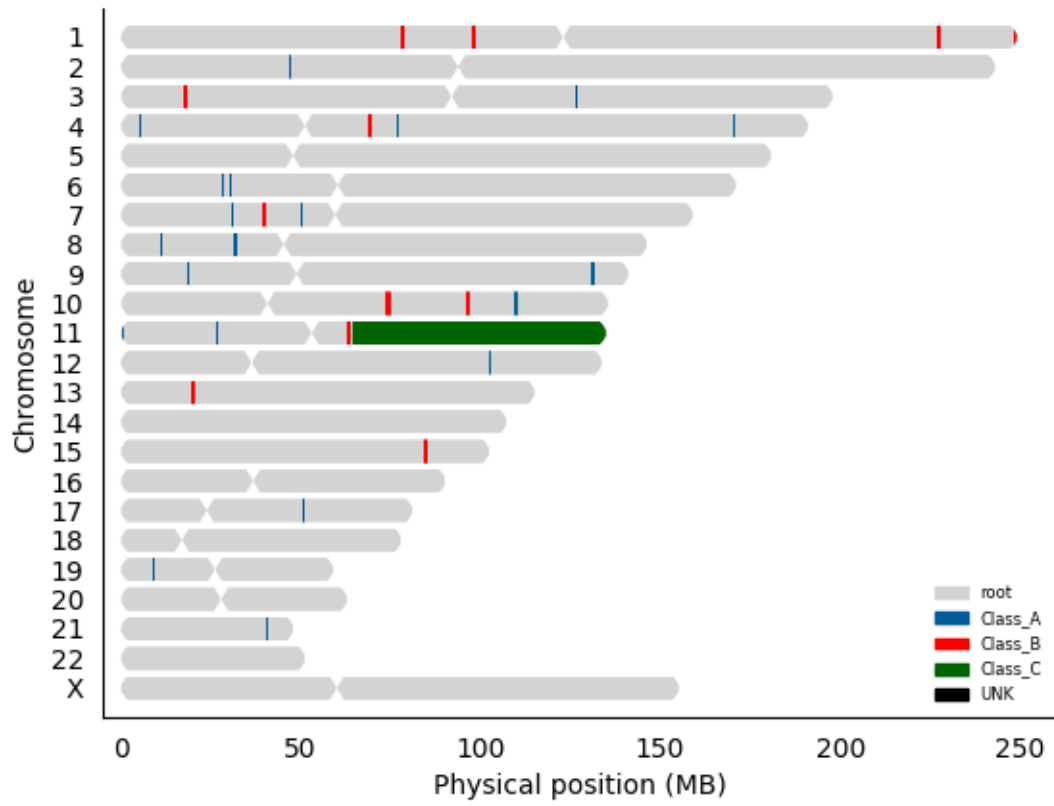

### Putative UPD2

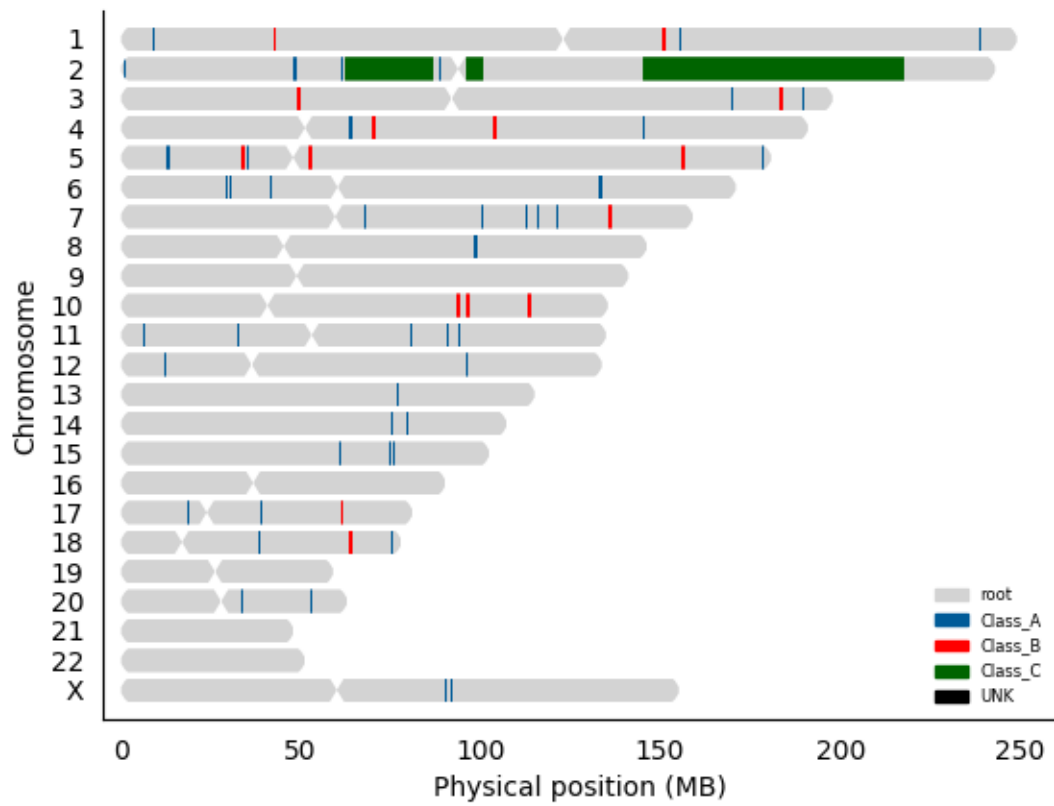

### Putative UPD17

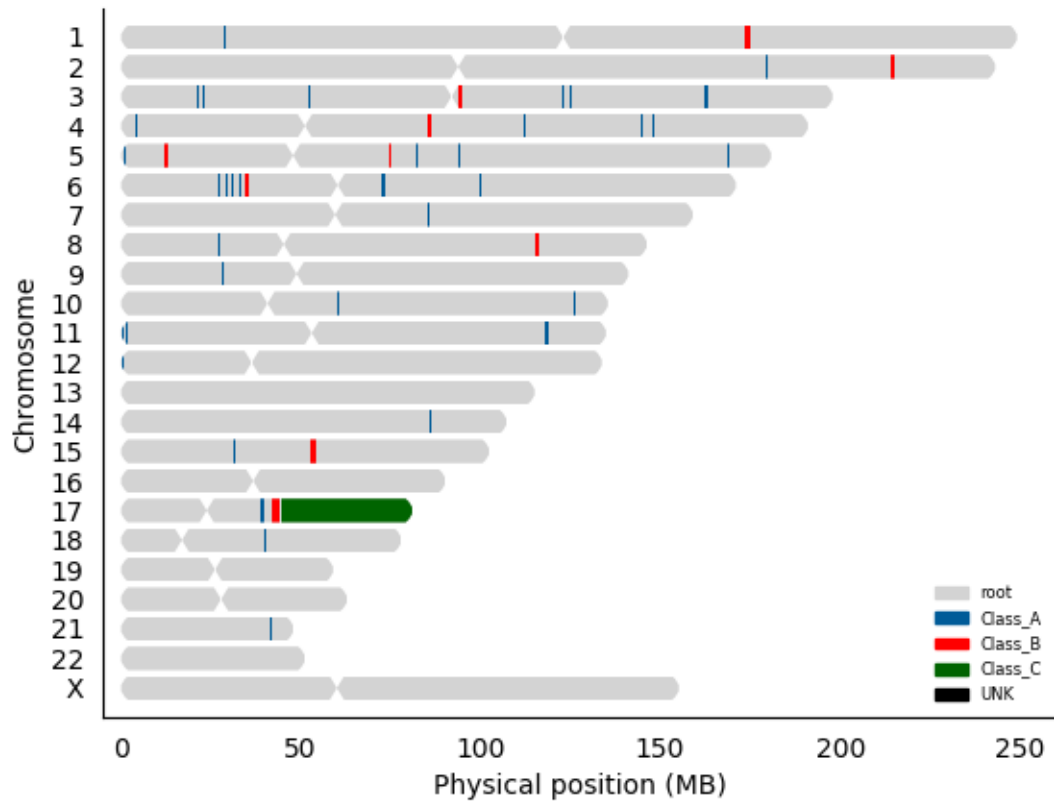

### Putative UPD11

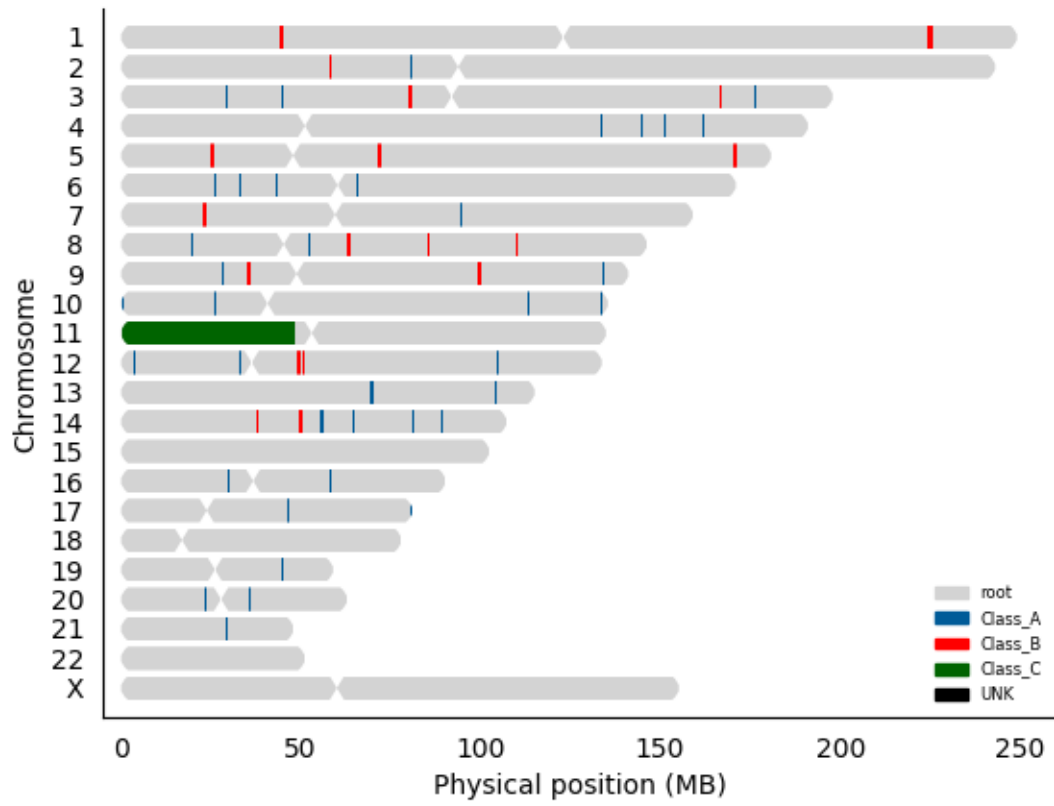

### Putative UPDX

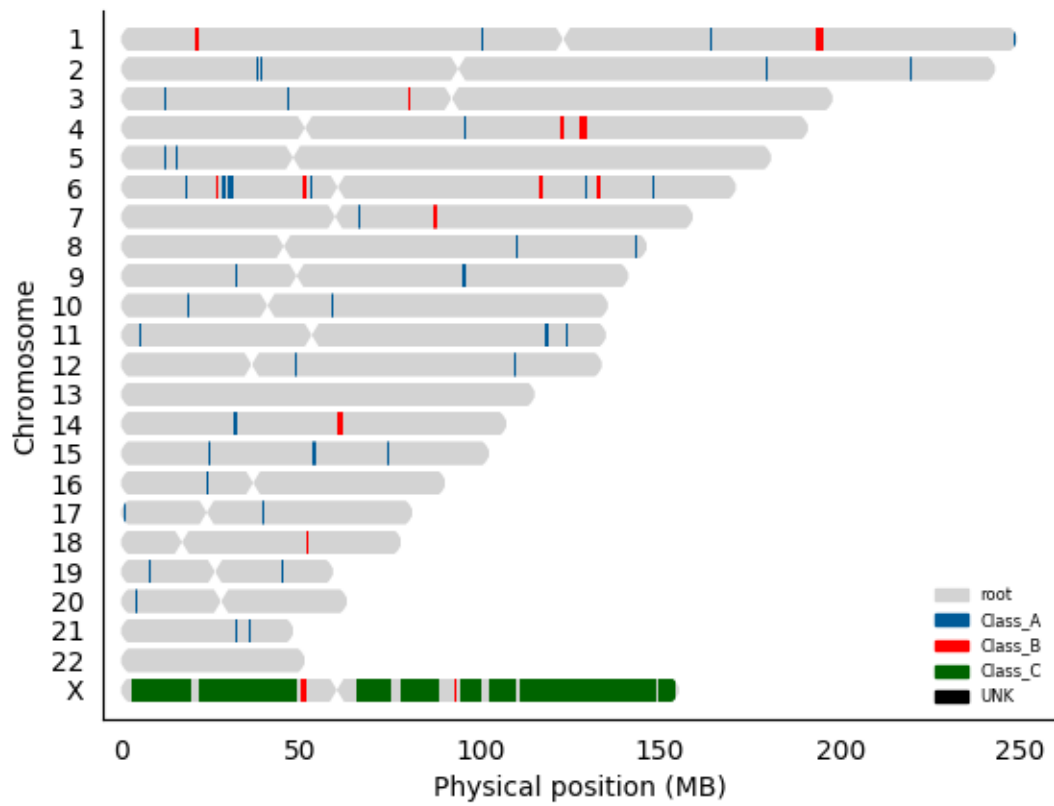

### Putative UPD17

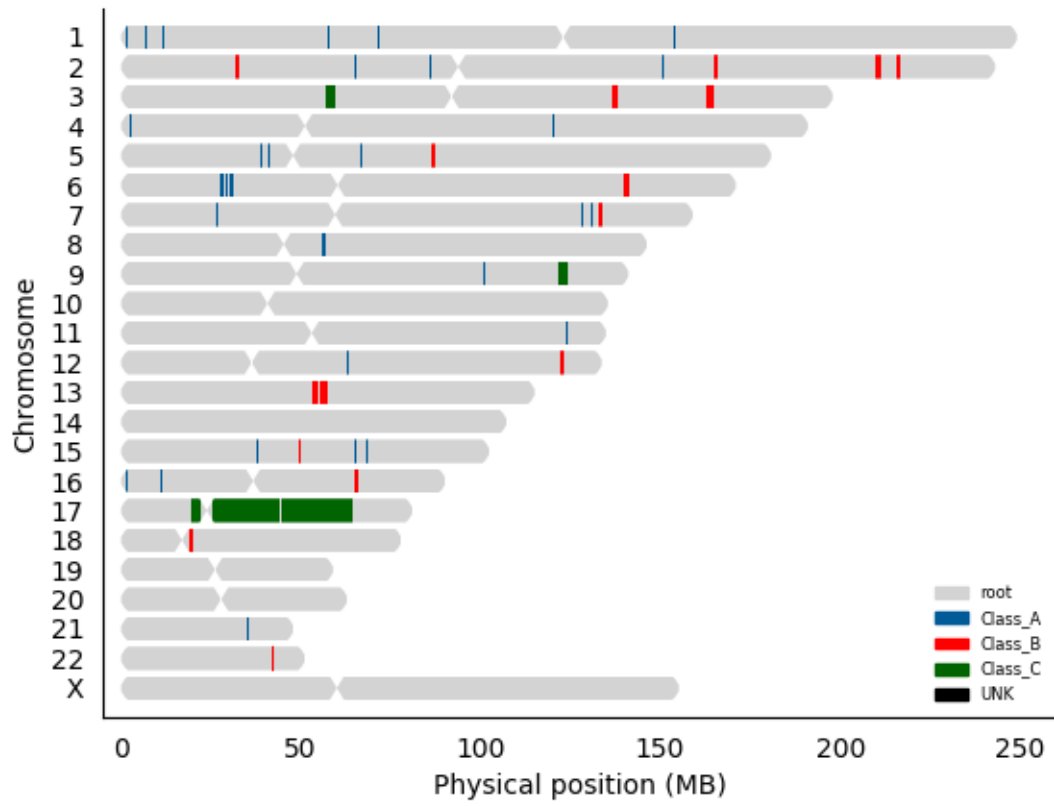

### Putative UPD11

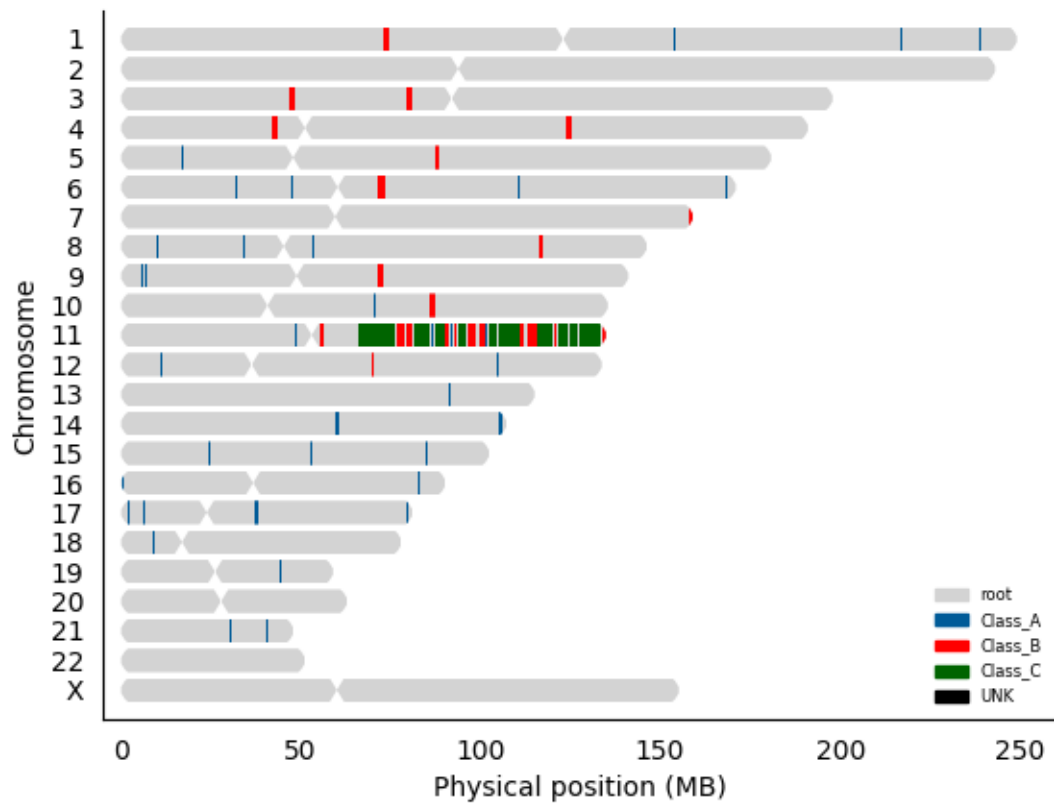

### Putative UPDX

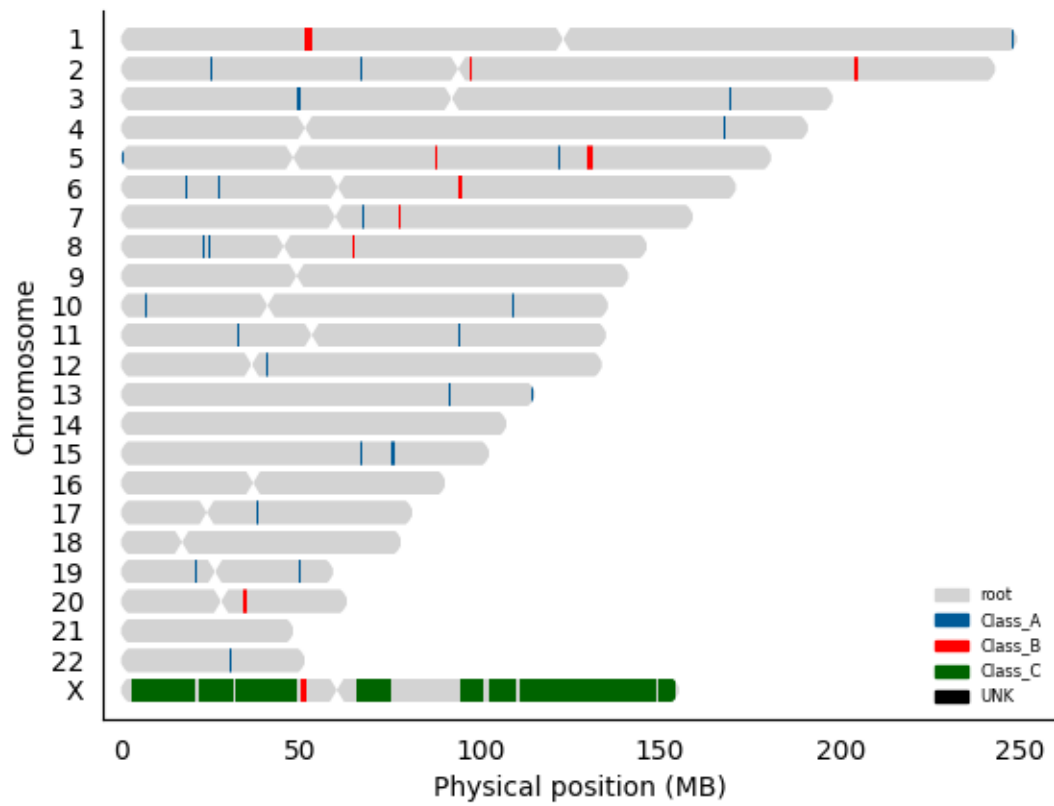



### Putative UPD17

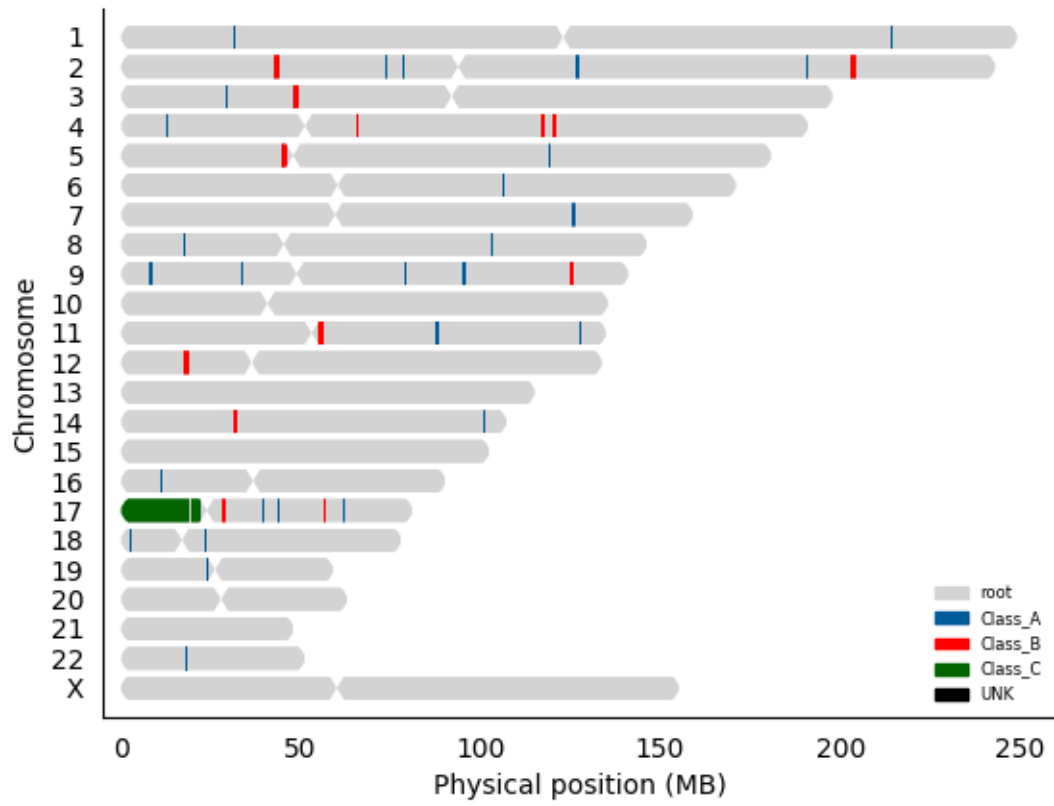

### Putative UPD11

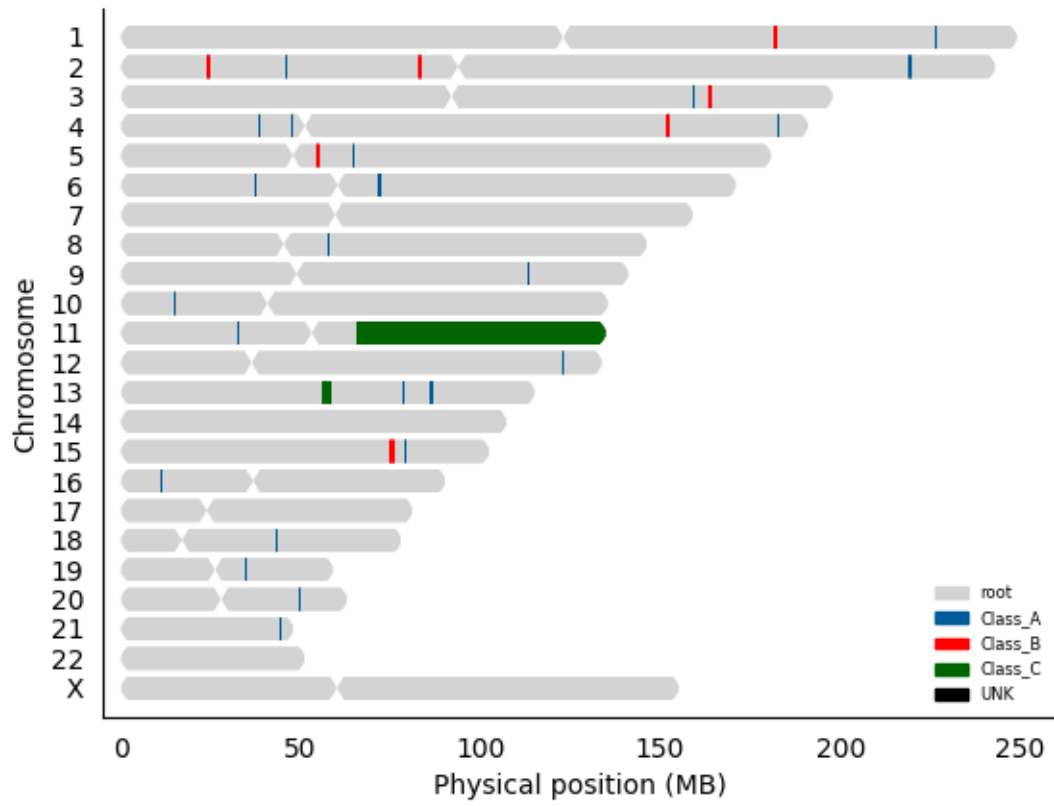

### Putative UPD16

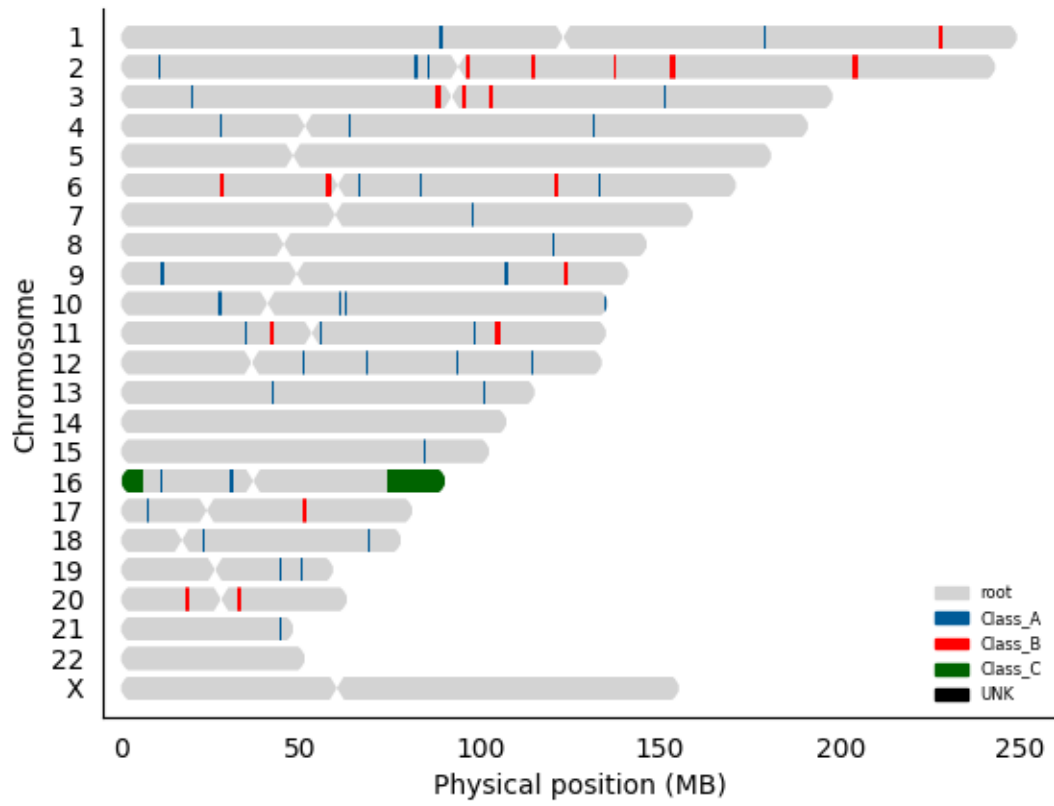

### Putative UPDX

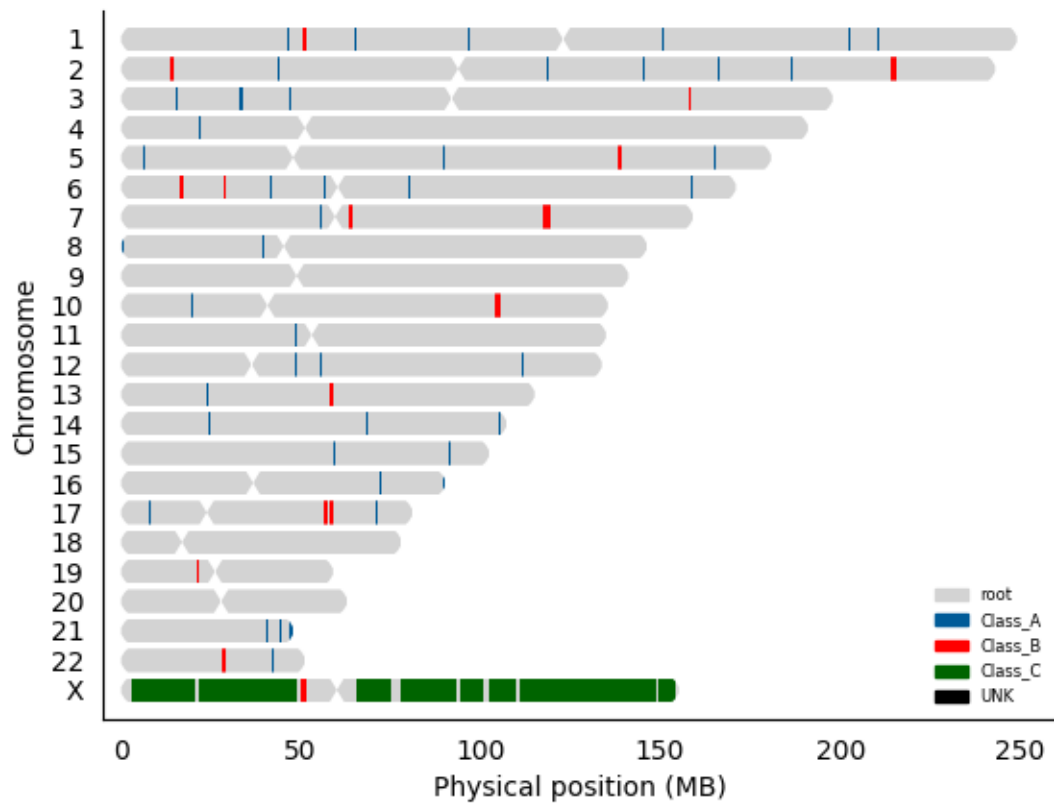

### Putative UPD11

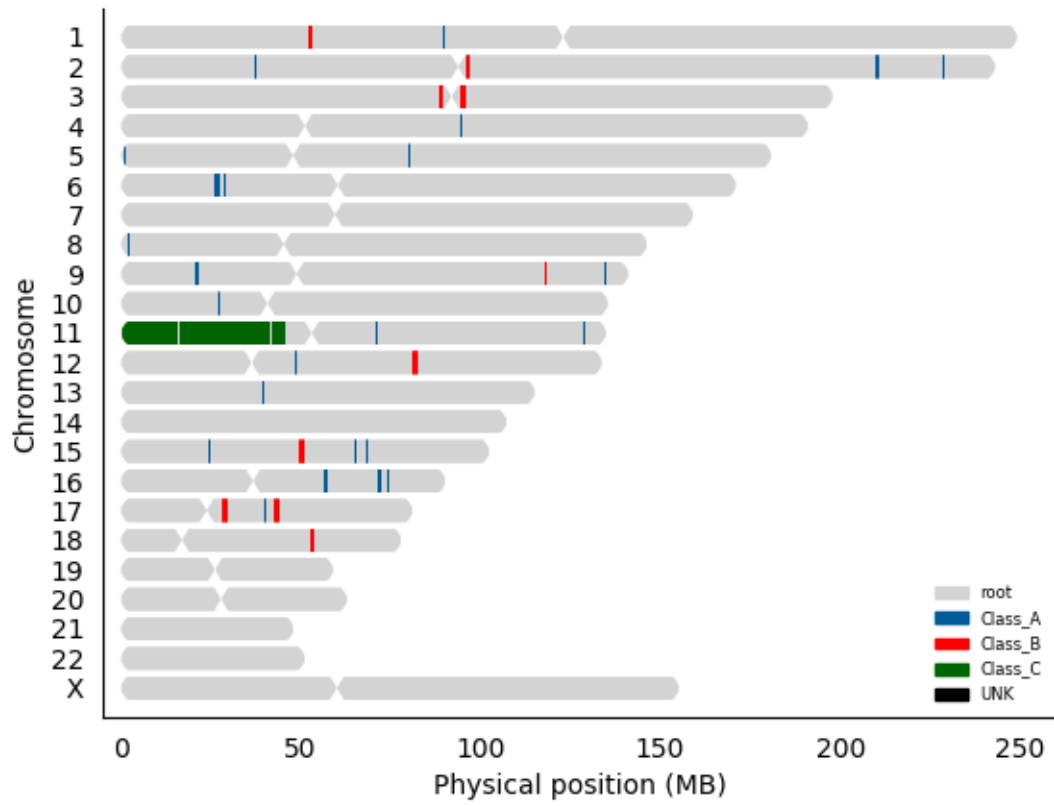

### Putative UPDX

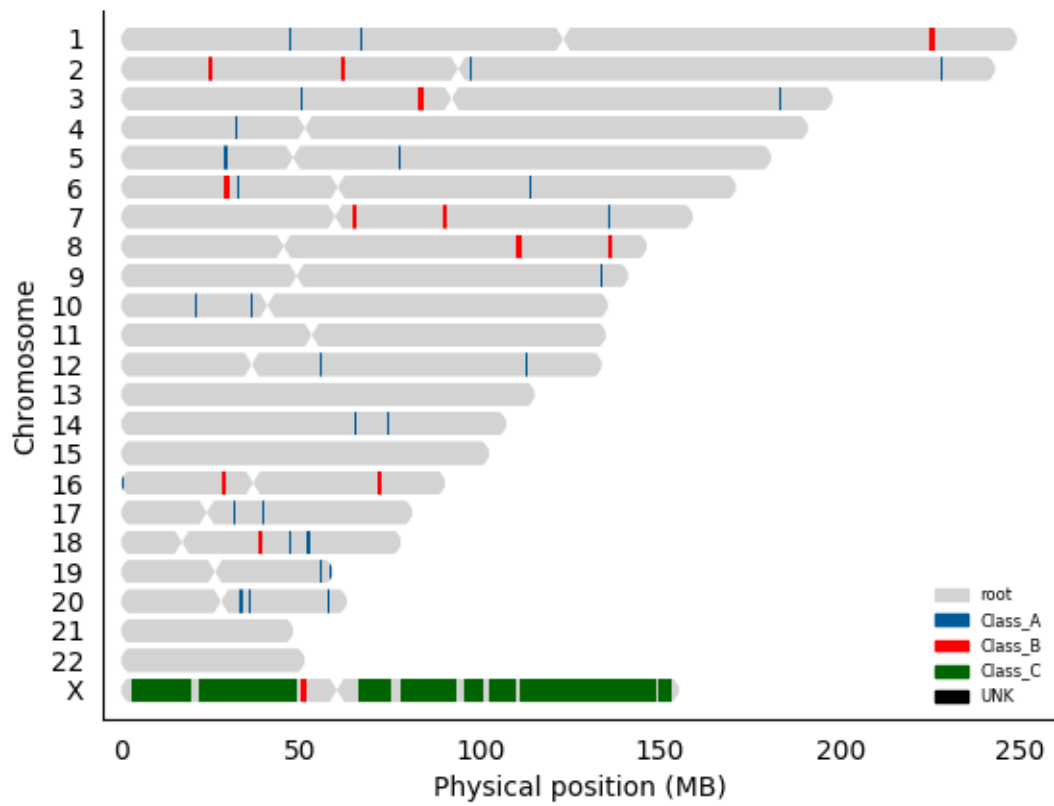

### Putative UPD16

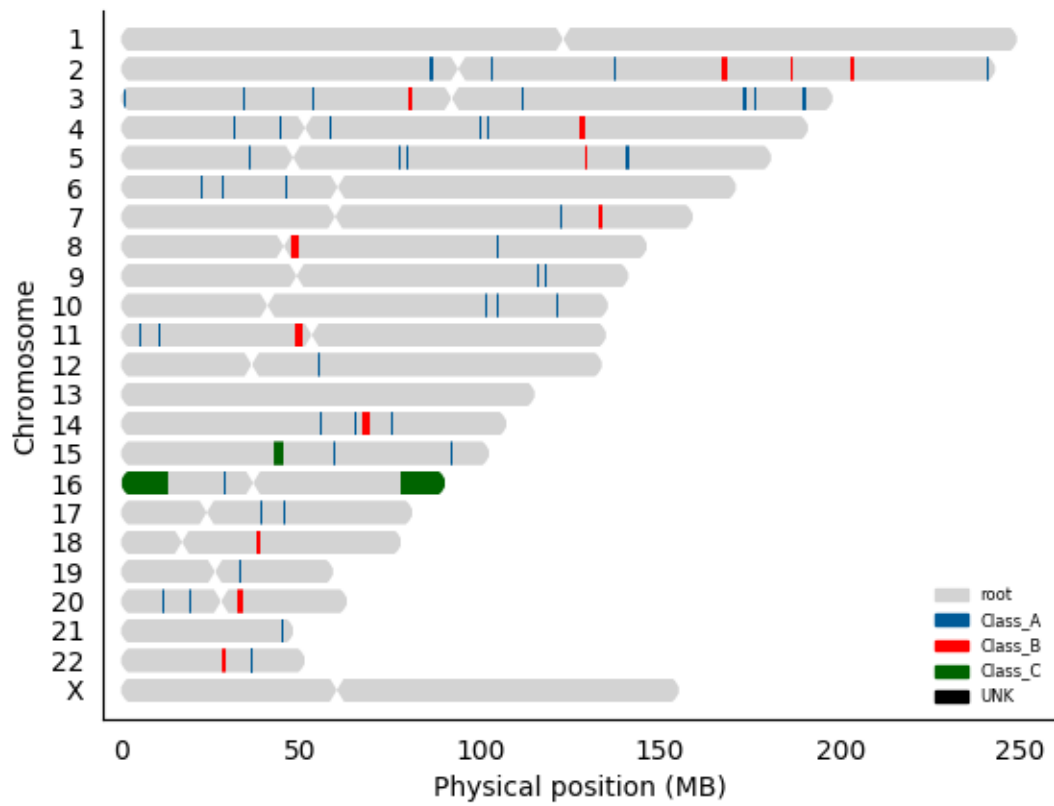

### Putative UPD11

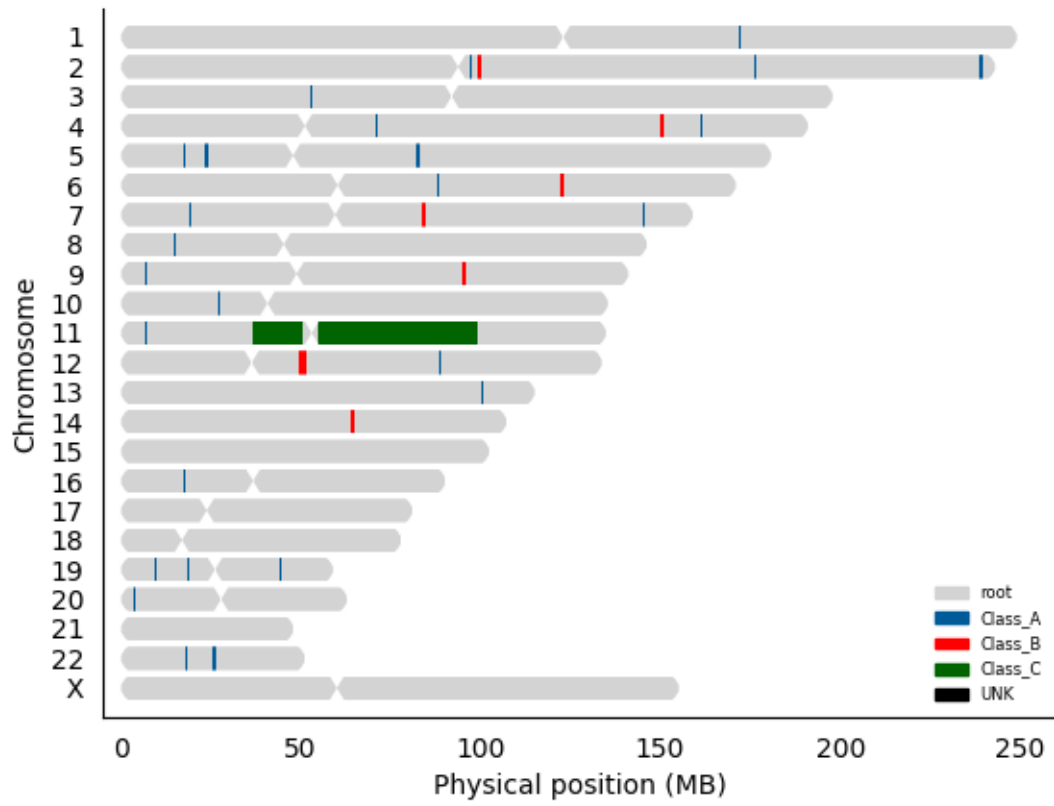



### Putative UPDX

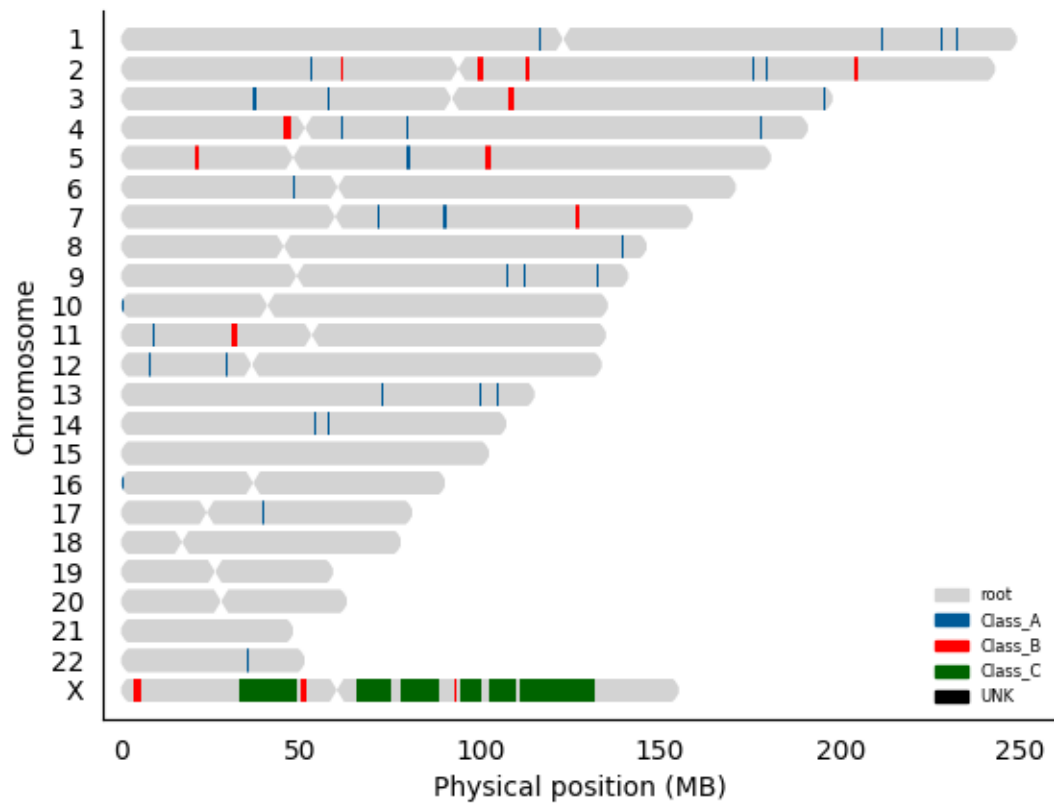

### Putative UPD16

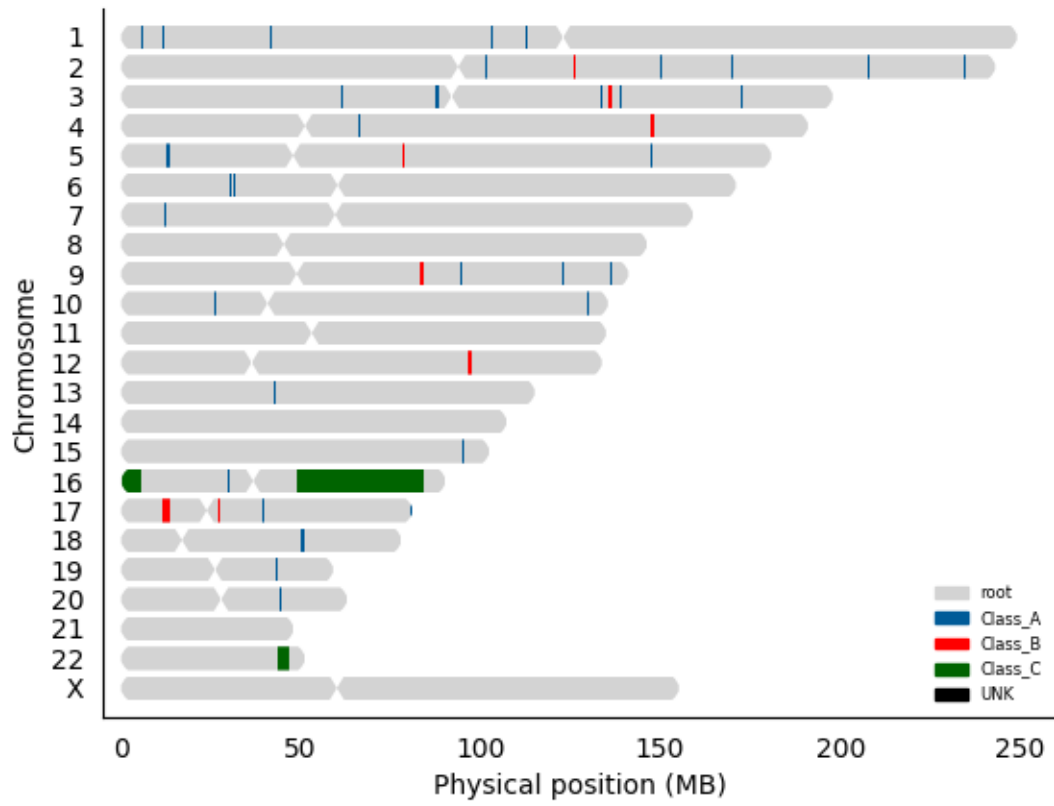

### Putative UPD10

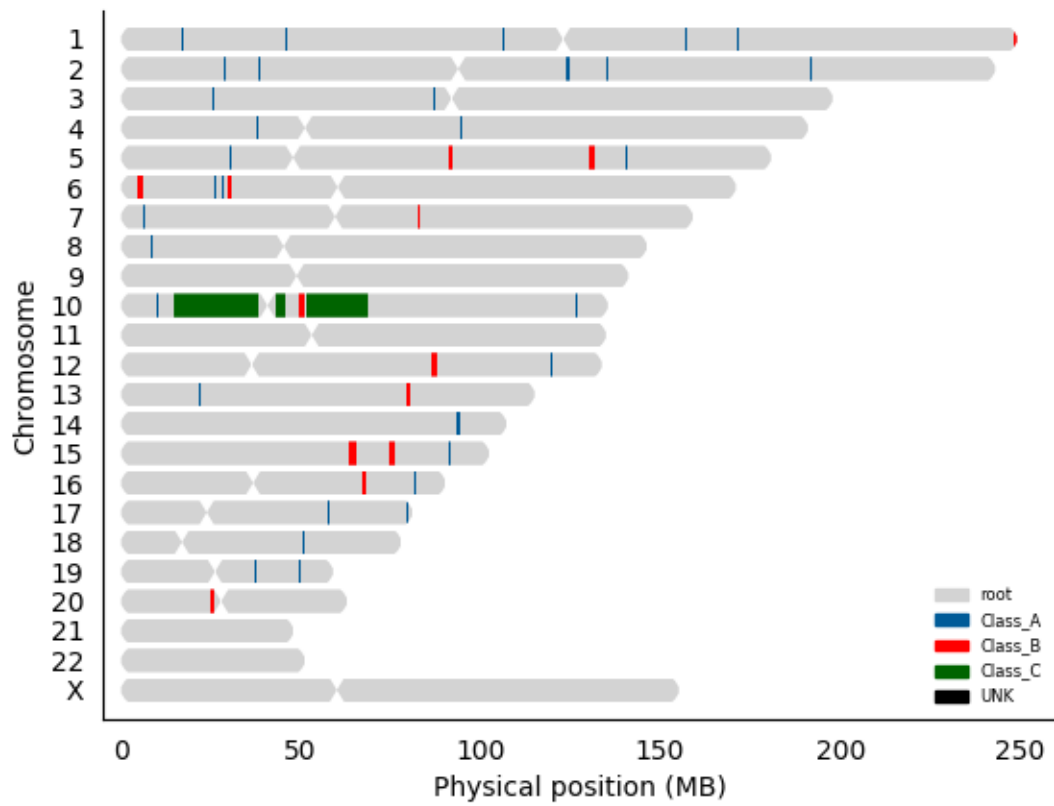

### Putative UPDX

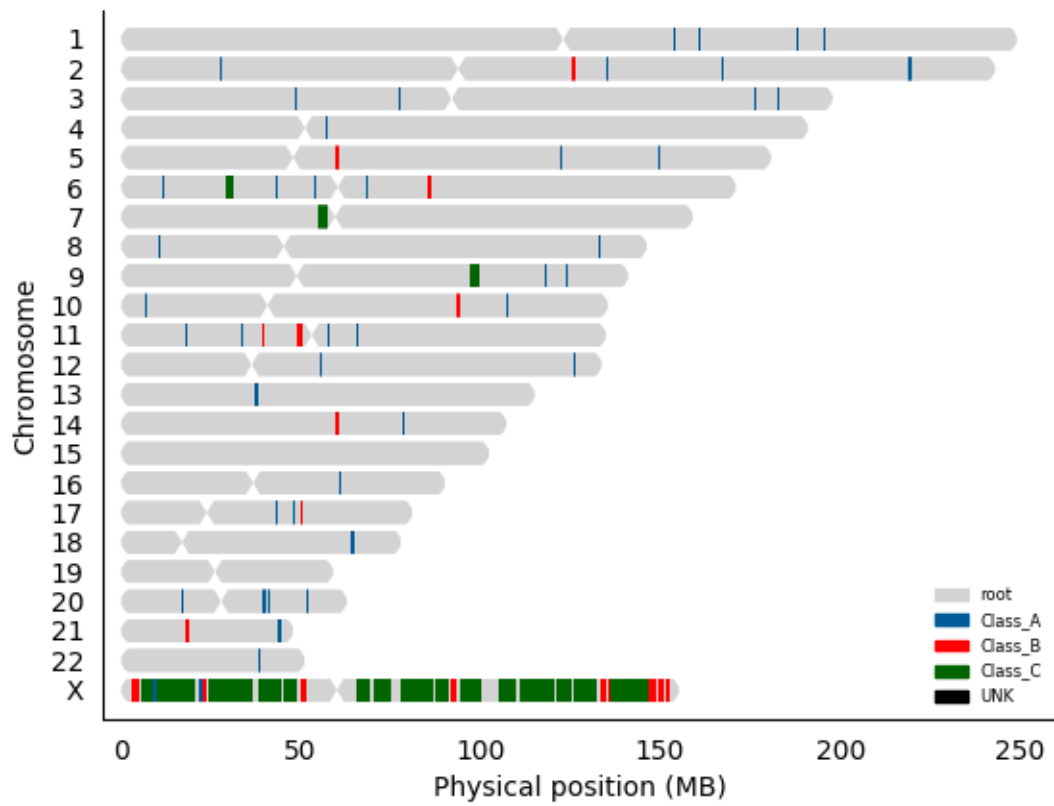

### Putative UPD16

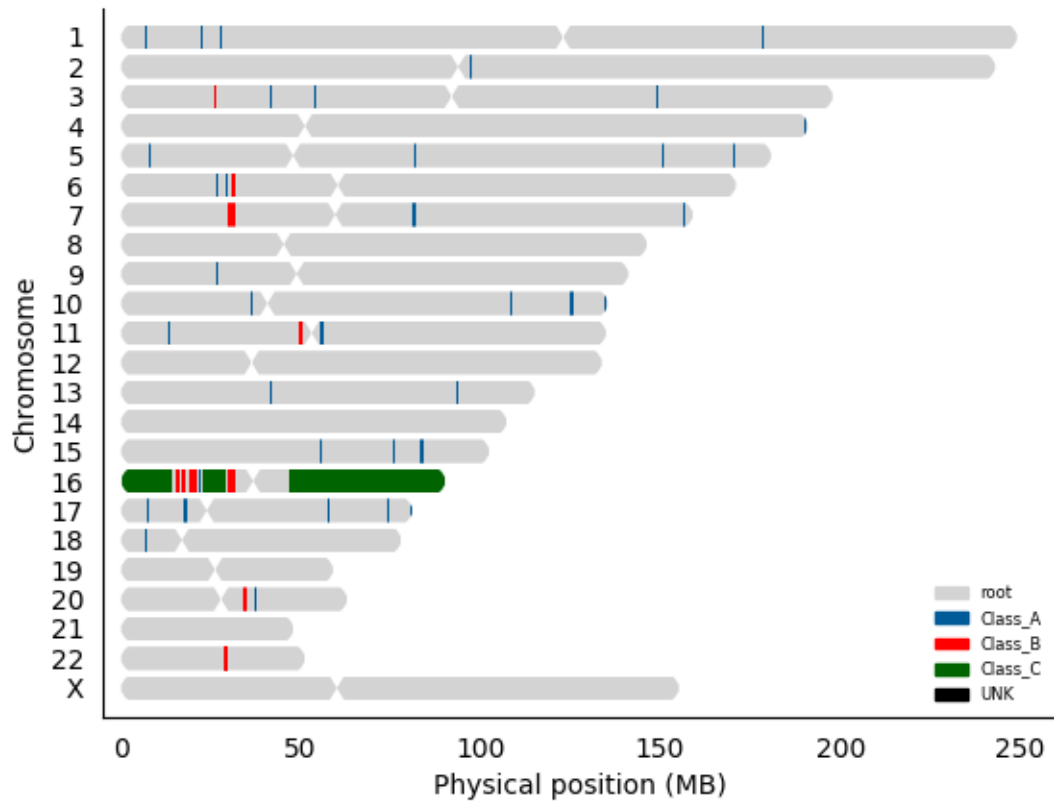

### Putative UPD10

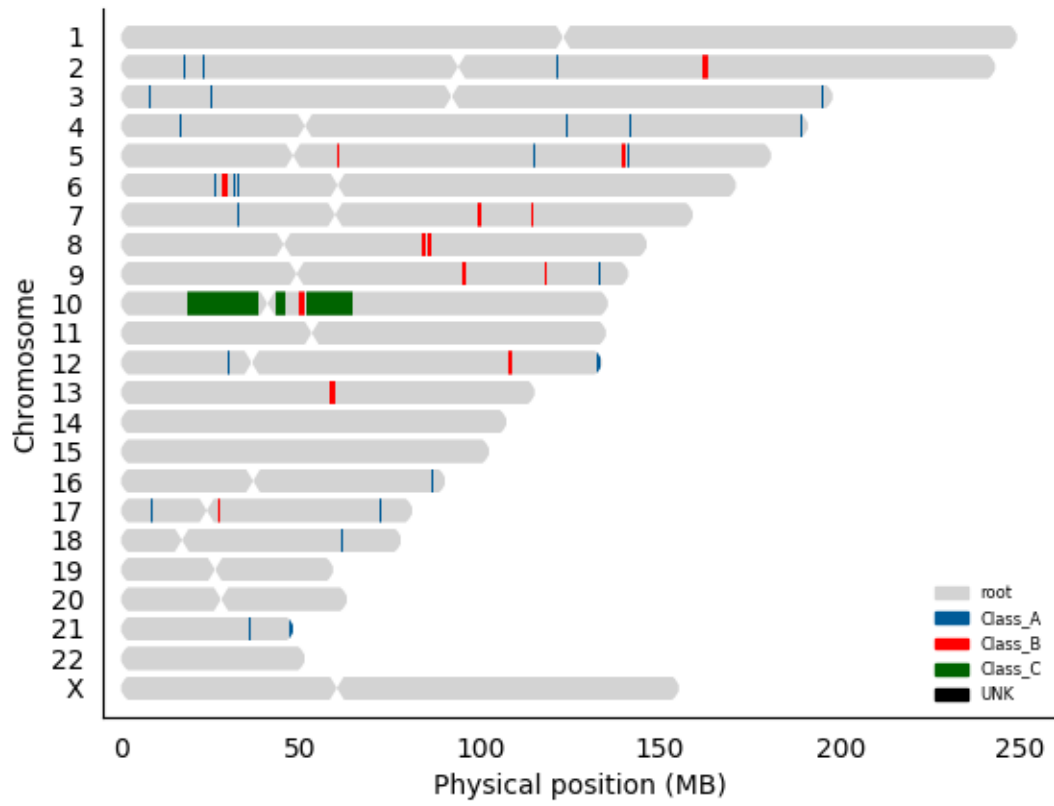

### Putative UPDX

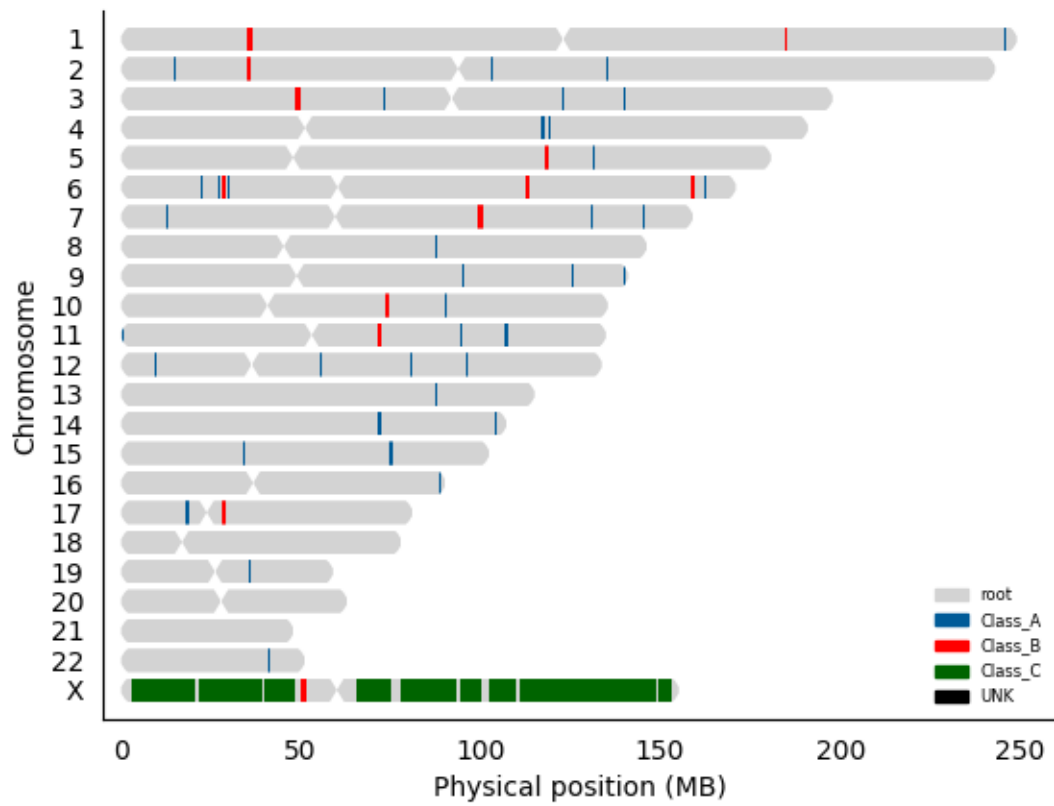

### Putative UPD16

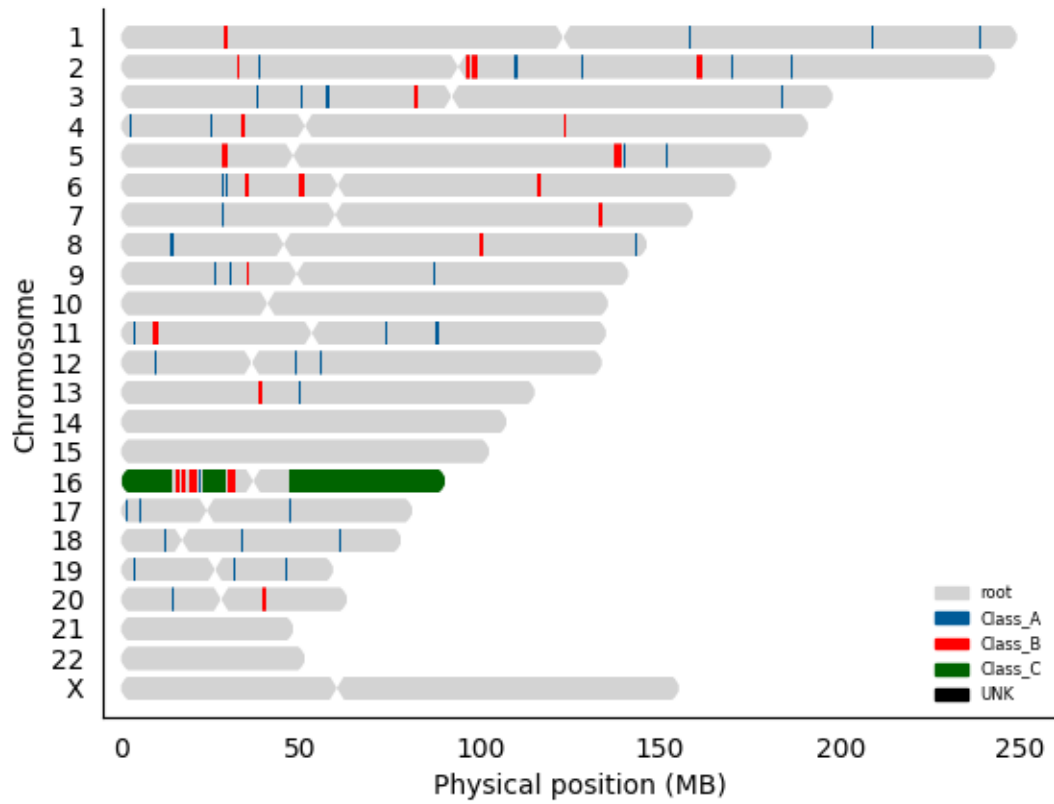



### Putative UPD10

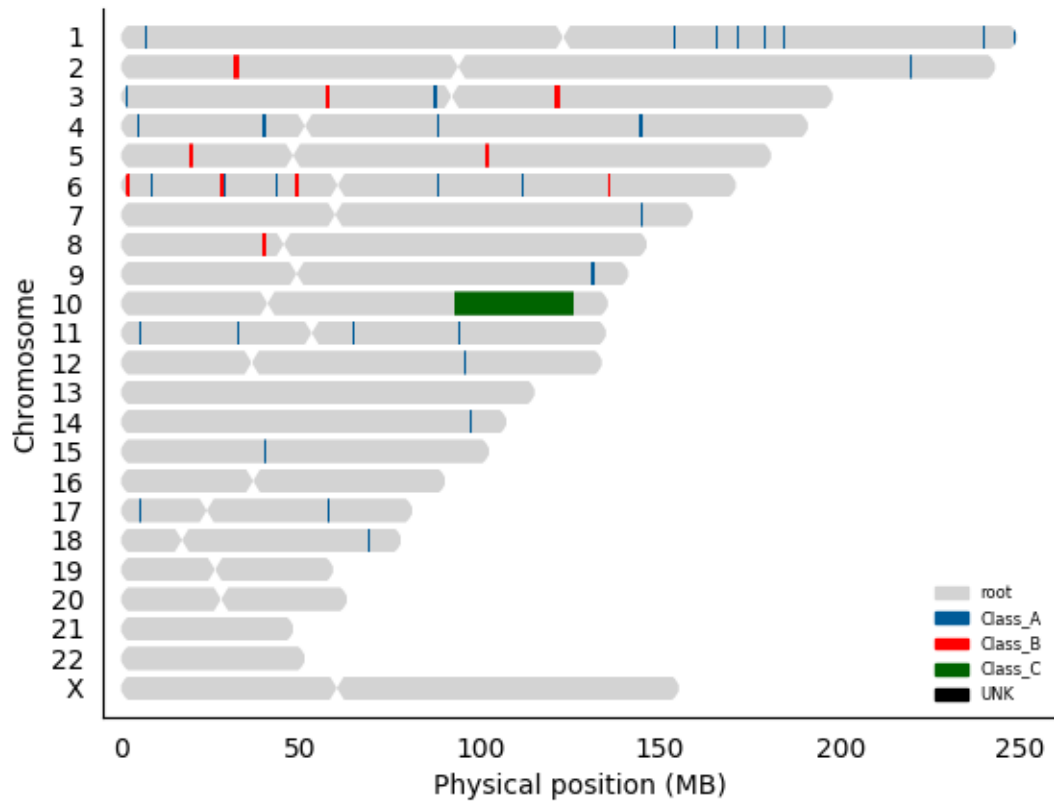

### Putative UPDX

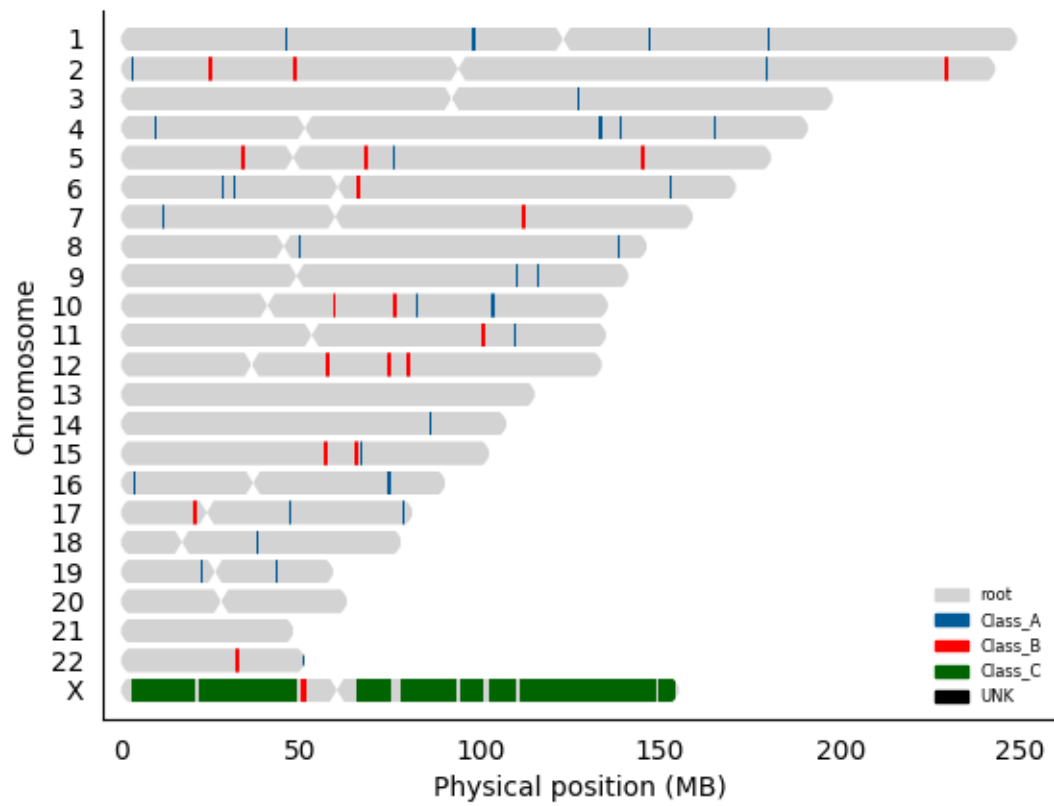

### Putative UPD16

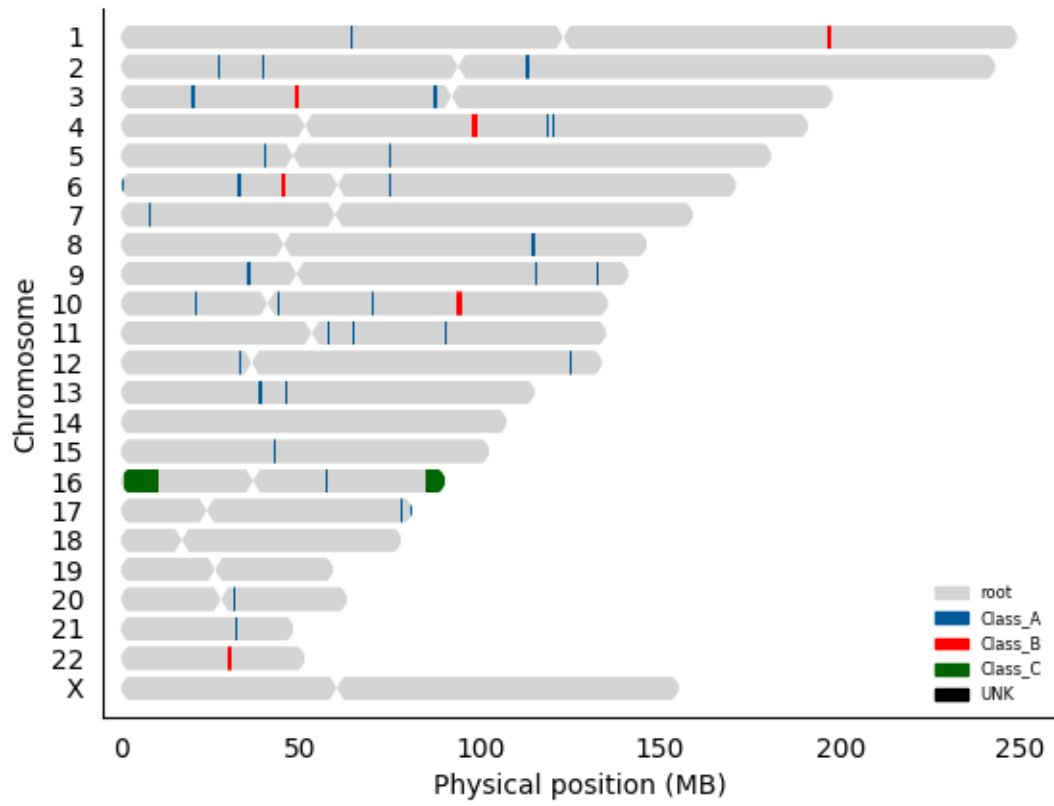

### Putative UPD10

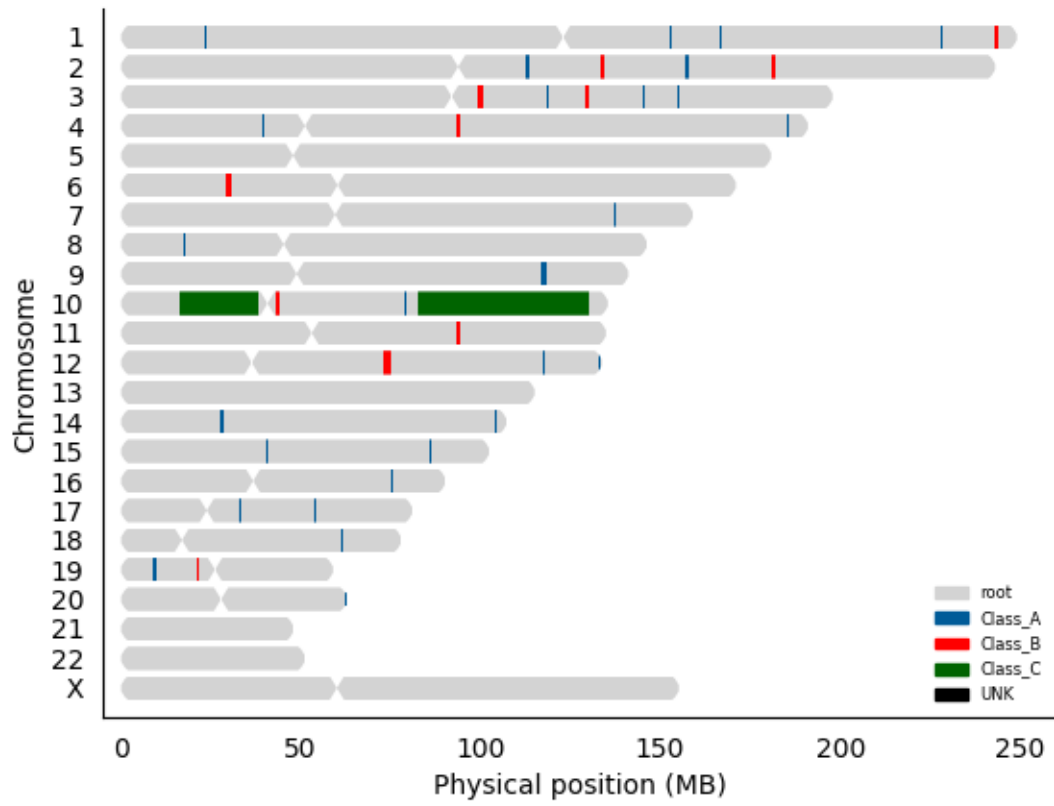

Supplement: mmc2.pdf [file mmc2.pdf]
